# Supplementary material for: Central role of Tim17 in mitochondrial presequence protein translocation
Source: PubMed Central journal article supplement (PMC10511324; doi:10.1038/s41586-023-06477-8), 2023-08-01
Supplement: 41586_2023_6477_MOESM1_ESM.pdf [file 41586_2023_6477_MOESM1_ESM.pdf]

**Supplementary information**

---

**Central role of Tim17 in mitochondrial  
presequence protein translocation**

---

In the format provided by the  
authors and unedited

## Supplementary Information

### Central role of Tim17 in mitochondrial presequence protein translocation

Fielden et al.

#### Table of contents:

Supplementary Figure 1. Uncropped versions of gels/western blots of this study

Supplementary Table 1. Yeast strains used in this study

Supplementary Table 2. Plasmids used in this study

Supplementary Table 3. Primers used in this study

Supplementary Table 4. Antibodies used in this study

#### References:

- Ieva, R. *et al.* Mgr2 functions as lateral gatekeeper for preprotein sorting in the mitochondrial inner membrane. *Mol. Cell* **56**, 641–652 (2014).
- Gomkale, R. *et al.* Mapping protein interactions in the active TOM-TIM23 supercomplex. *Nat. Commun.* **12**, 5715 (2021).
- Chacinska, A. *et al.* Mitochondrial presequence translocase: switching between TOM tethering and motor recruitment involves Tim21 and Tim17. *Cell* **120**, 817–829 (2005).
- Gebert, M. *et al.* Mgr2 promotes coupling of the mitochondrial presequence translocase to partner complexes. *J. Cell Biol.* **197**, 595–604 (2012).
- Qiu, J. *et al.* Coupling of Mitochondrial Import and Export Translocases by Receptor-Mediated Supercomplex Formation. *Cell* **154**, 596–608 (2013).
- Longtine, M. S. *et al.* Additional modules for versatile and economical PCR-based gene deletion and modification in *Saccharomyces cerevisiae*. *Yeast* **14**, 953–961 (1998).
- Chacinska, A. *et al.* Distinct Forms of Mitochondrial TOM-TIM Supercomplexes Define Signal-Dependent States of Preprotein Sorting. *Mol. Cell. Biol.* **30**, 307–318 (2010).
- Voos, W. *et al.* Mitochondrial GrpE is present in a complex with hsp70 and preproteins in transit across membranes. *Mol. Cell. Biol.* **14**, 6627–6634 (1994).
- Janke, C. *et al.* A versatile toolbox for PCR-based tagging of yeast genes: new fluorescent proteins, more markers and promoter substitution cassettes. *Yeast* **21**, 947–962 (2004).
- Morgenstern, M. *et al.* Definition of a High-Confidence Mitochondrial Proteome at Quantitative Scale. *Cell Rep.* **19**, 2836–2852 (2017).
- Priesnitz, C. *et al.* Coupling to Pam16 differentially controls the dual role of Pam18 in protein import and respiratory chain formation. *Cell Rep.* **39**, 110619 (2022).
- Böttinger, L. *et al.* A complex of Cox4 and mitochondrial Hsp70 plays an important role in the assembly of the cytochrome *c* oxidase. *Mol. Biol. Cell* **24**, 2609–2619 (2013).
- Vögtle, F. N. *et al.* Mutations in PMPCB Encoding the Catalytic Subunit of the Mitochondrial Presequence Protease Cause Neurodegeneration in Early Childhood. *Am. J. Hum. Genet.* **102**, 557–573 (2018).
- Rampelt, H. *et al.* The mitochondrial carrier pathway transports non-canonical substrates with an odd number of transmembrane segments. *BMC Biol.* **18**, 2 (2020).
- Weinhäupl, K. *et al.* Structural Basis of Membrane Protein Chaperoning through the Mitochondrial Intermembrane Space. *Cell* **175**, 1365–1379.e25 (2018).

**Supplementary Figure 1. Uncropped versions of gels/western blots of this study**

**Figure 1c**

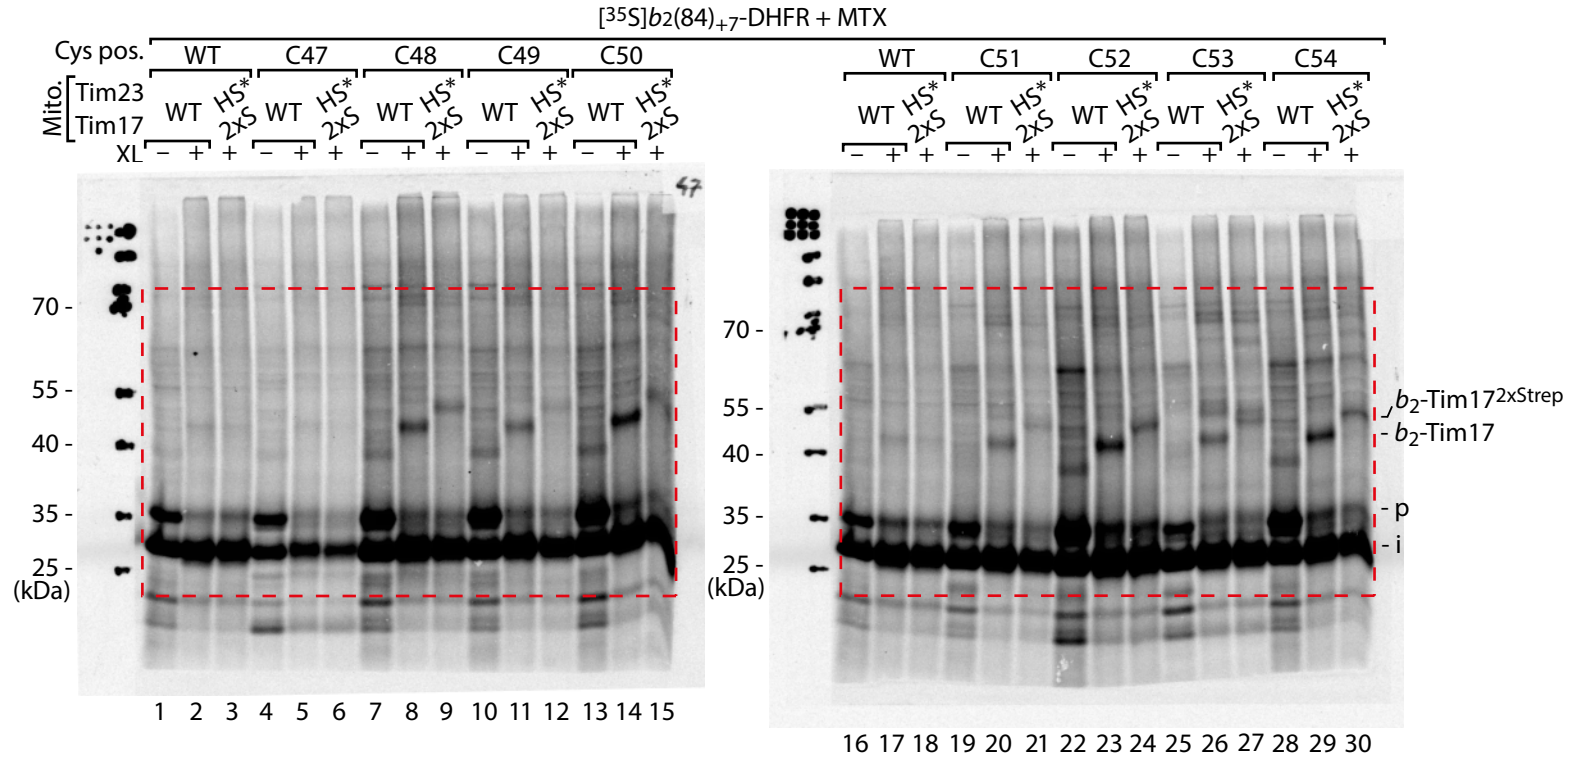

**Figure 1d**

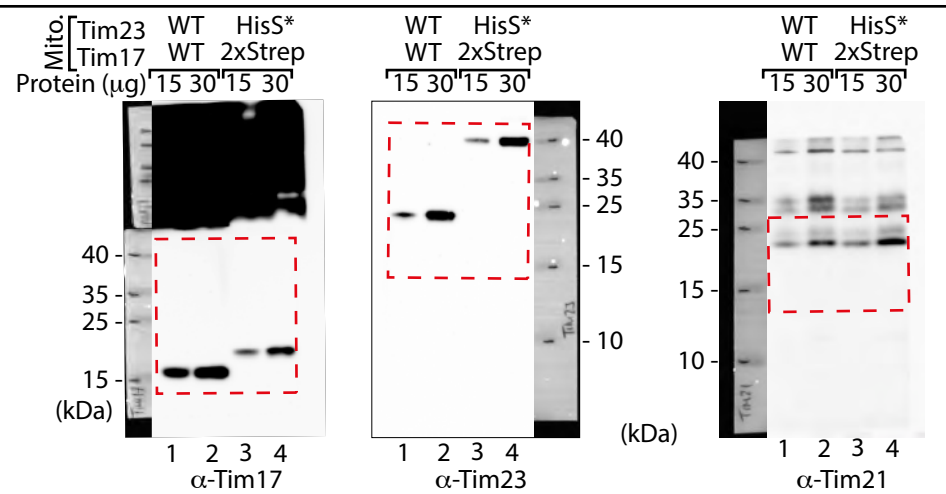

**Figure 1f**

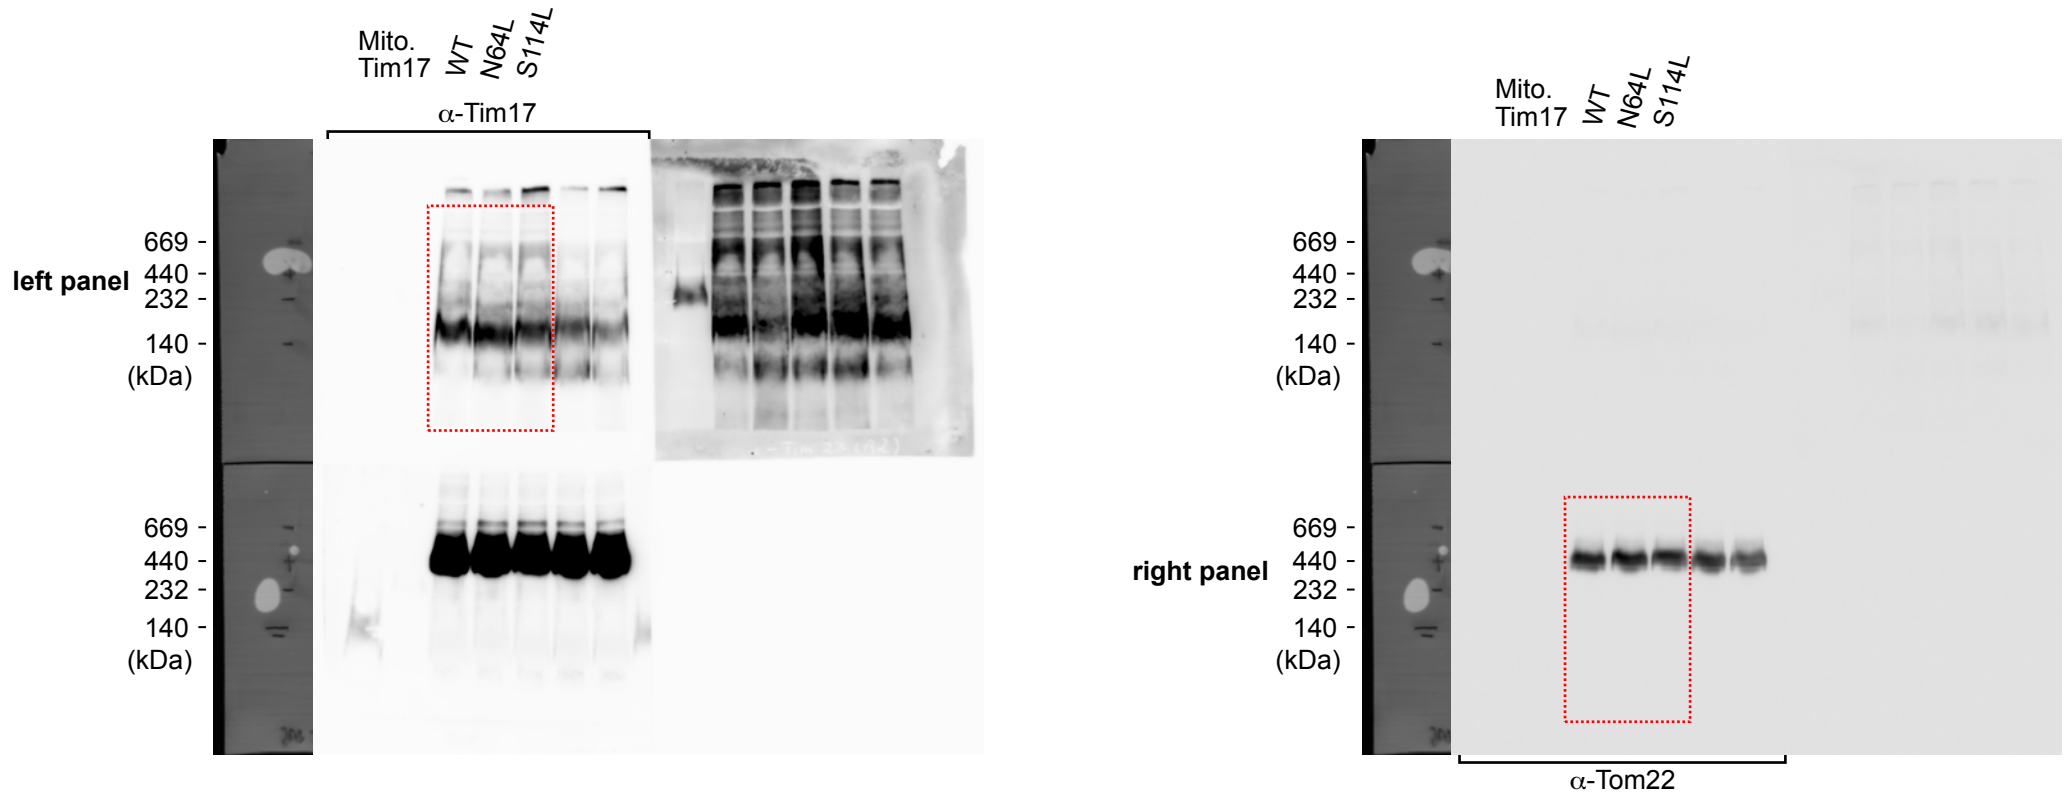



**Figure 1g**

**left panel**

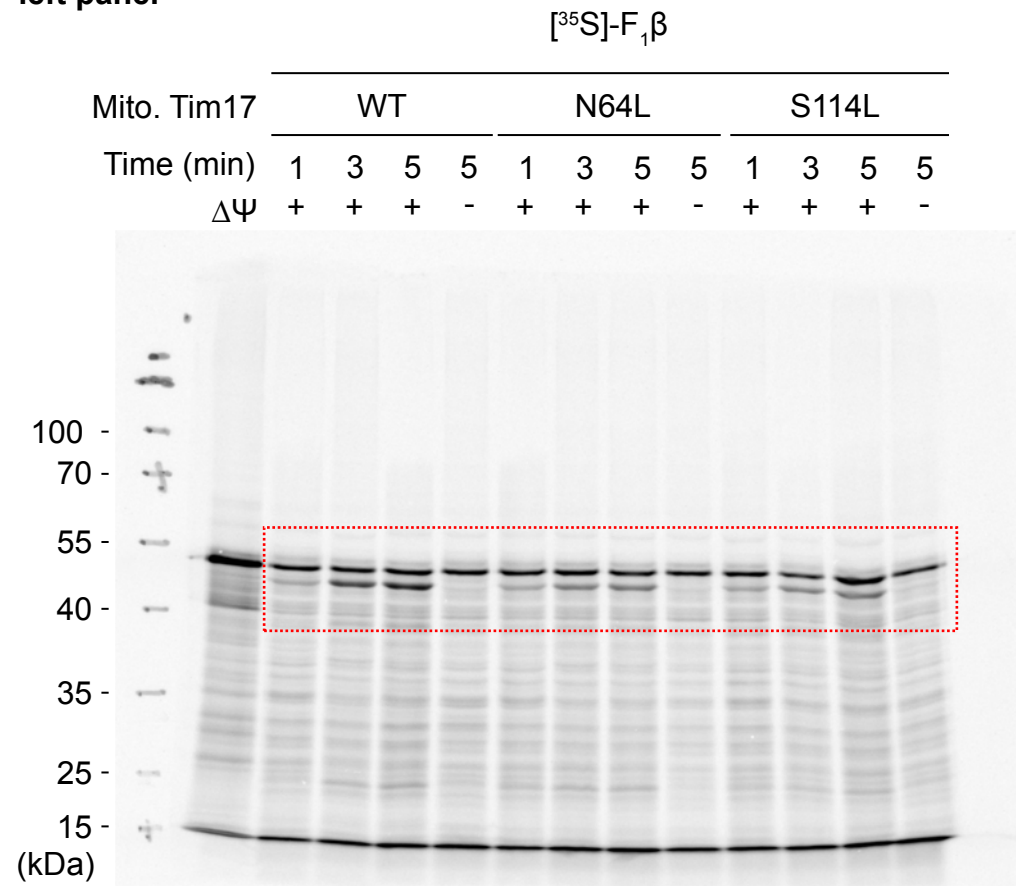

**right panel**

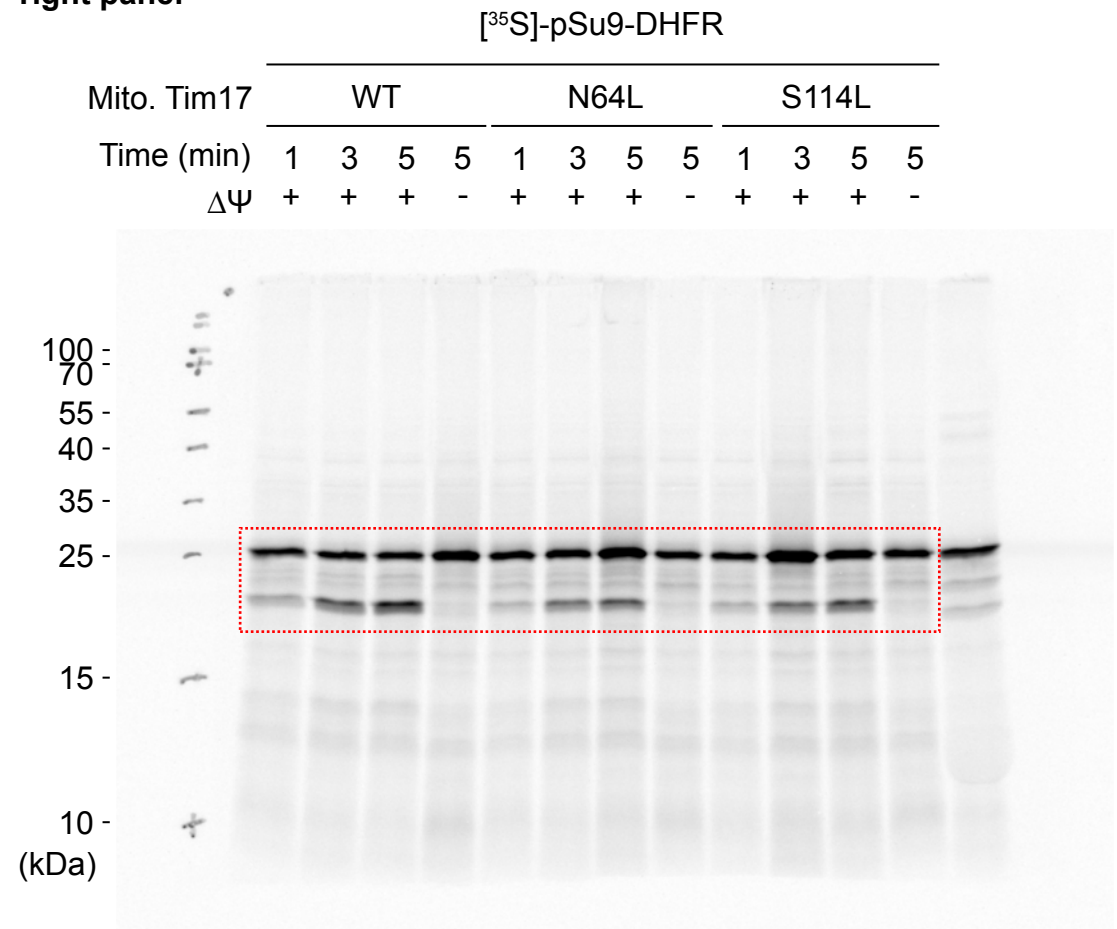

**Figure 2b**

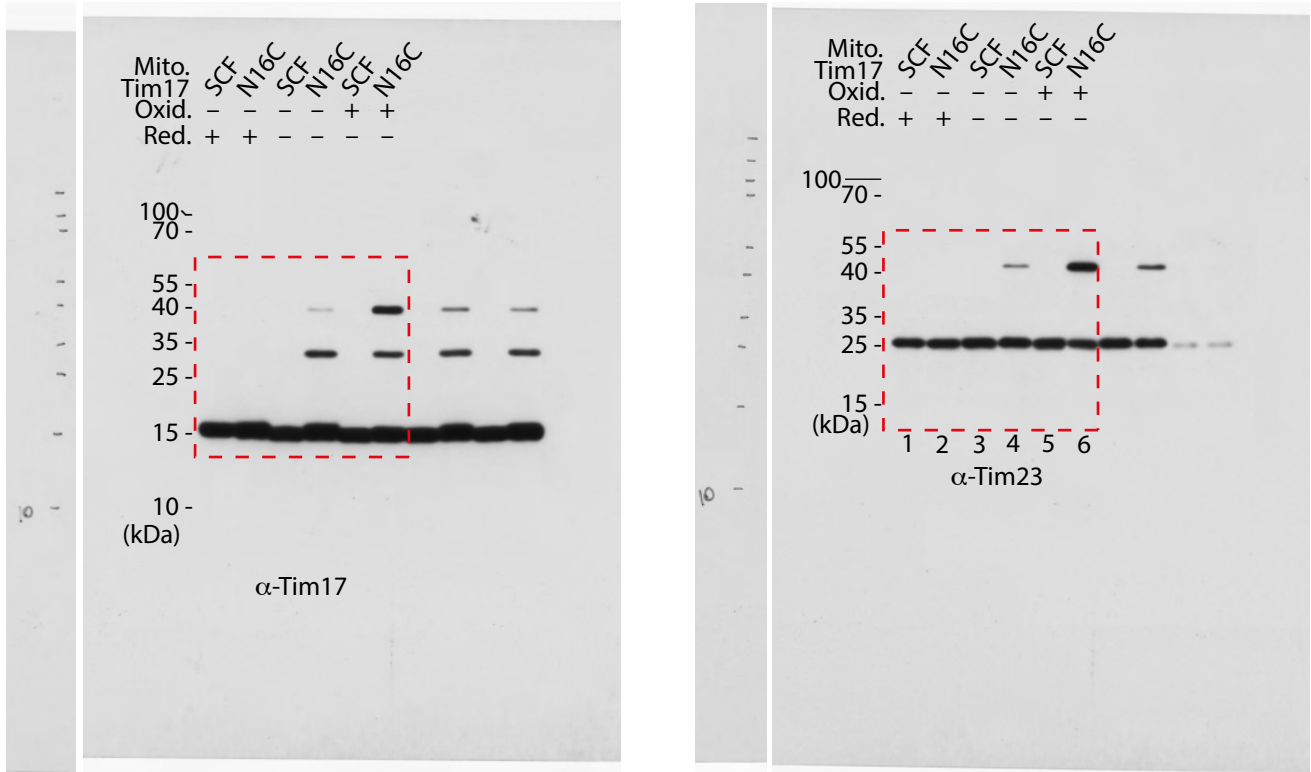

**Figure 2c**

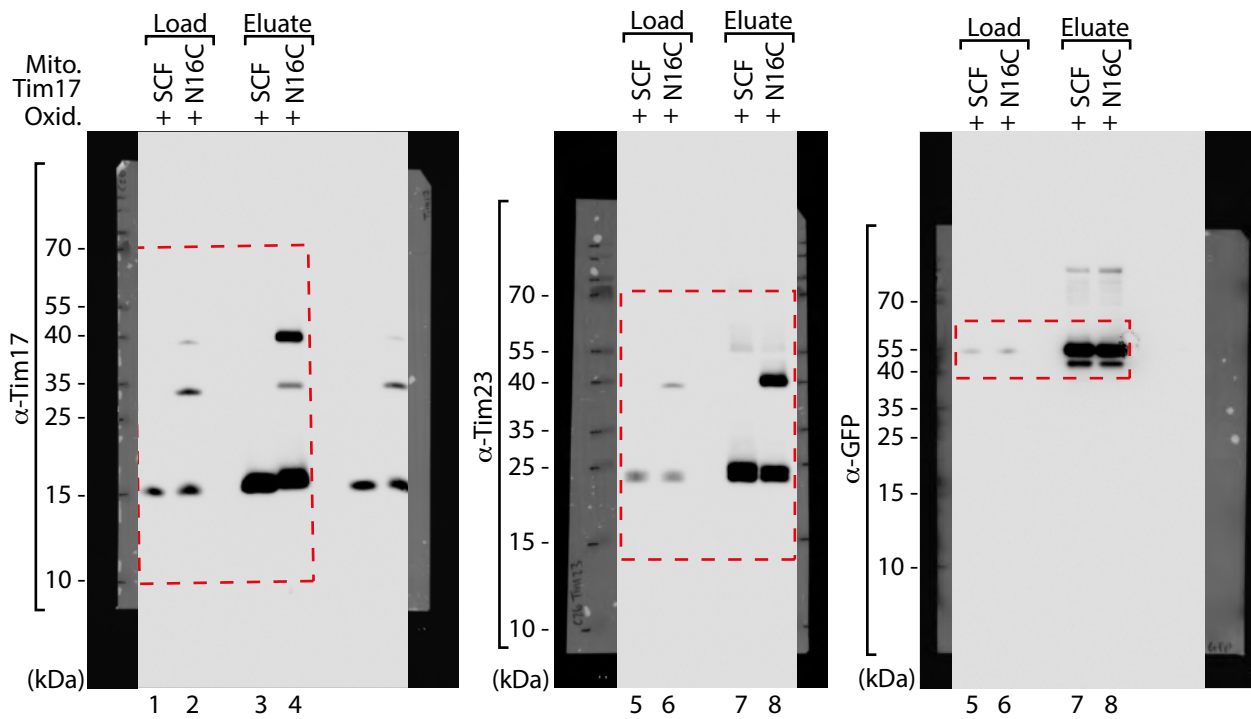

Figure 2d

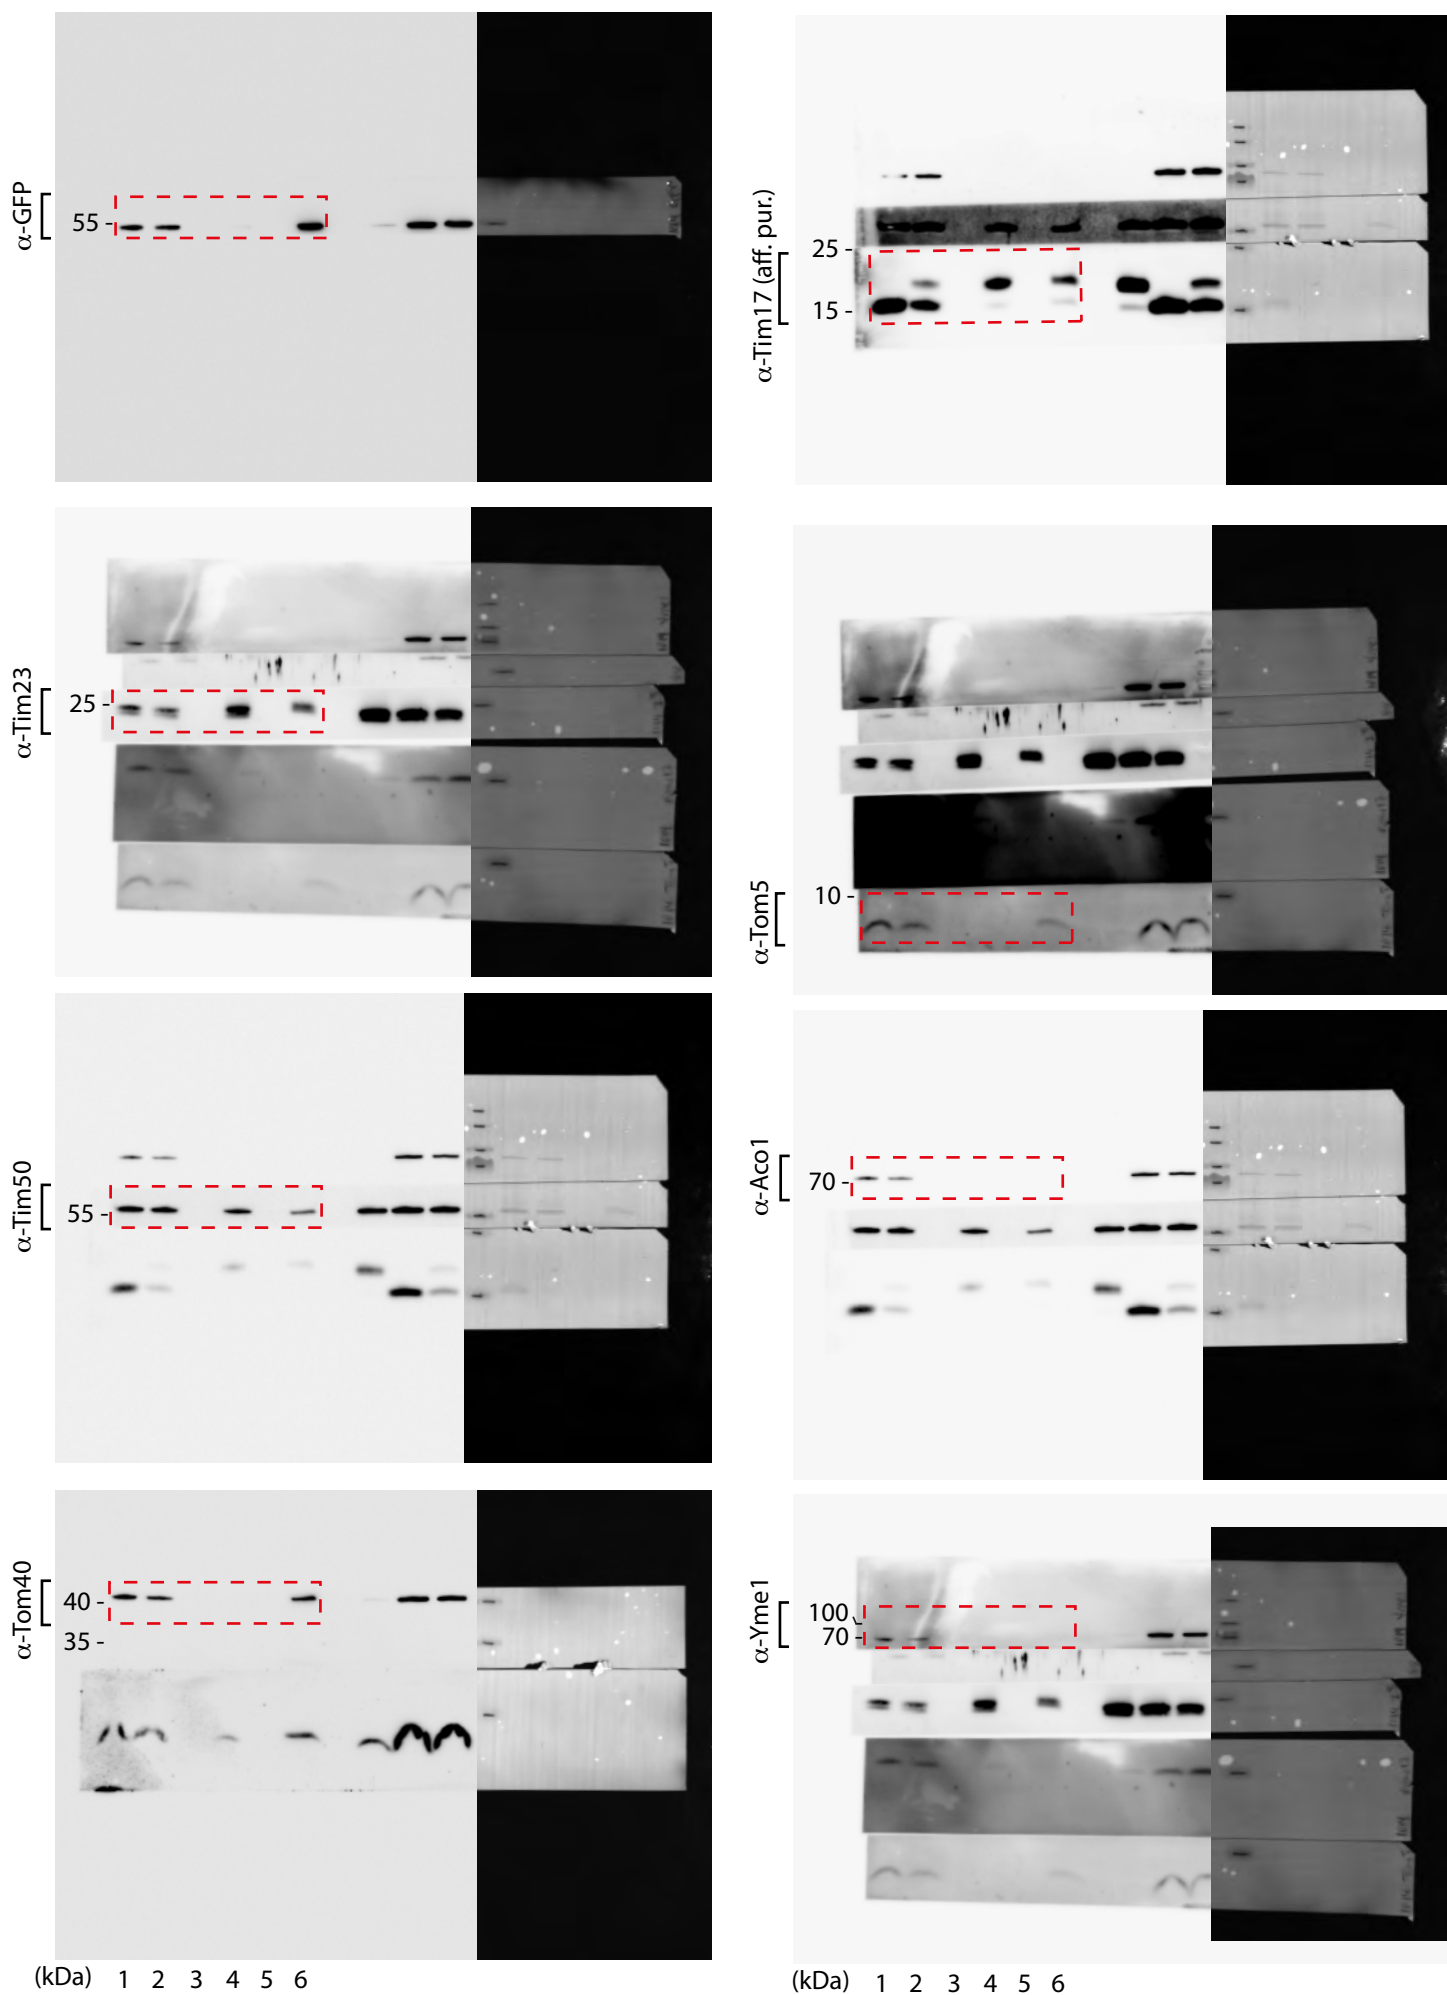

Figure 2e

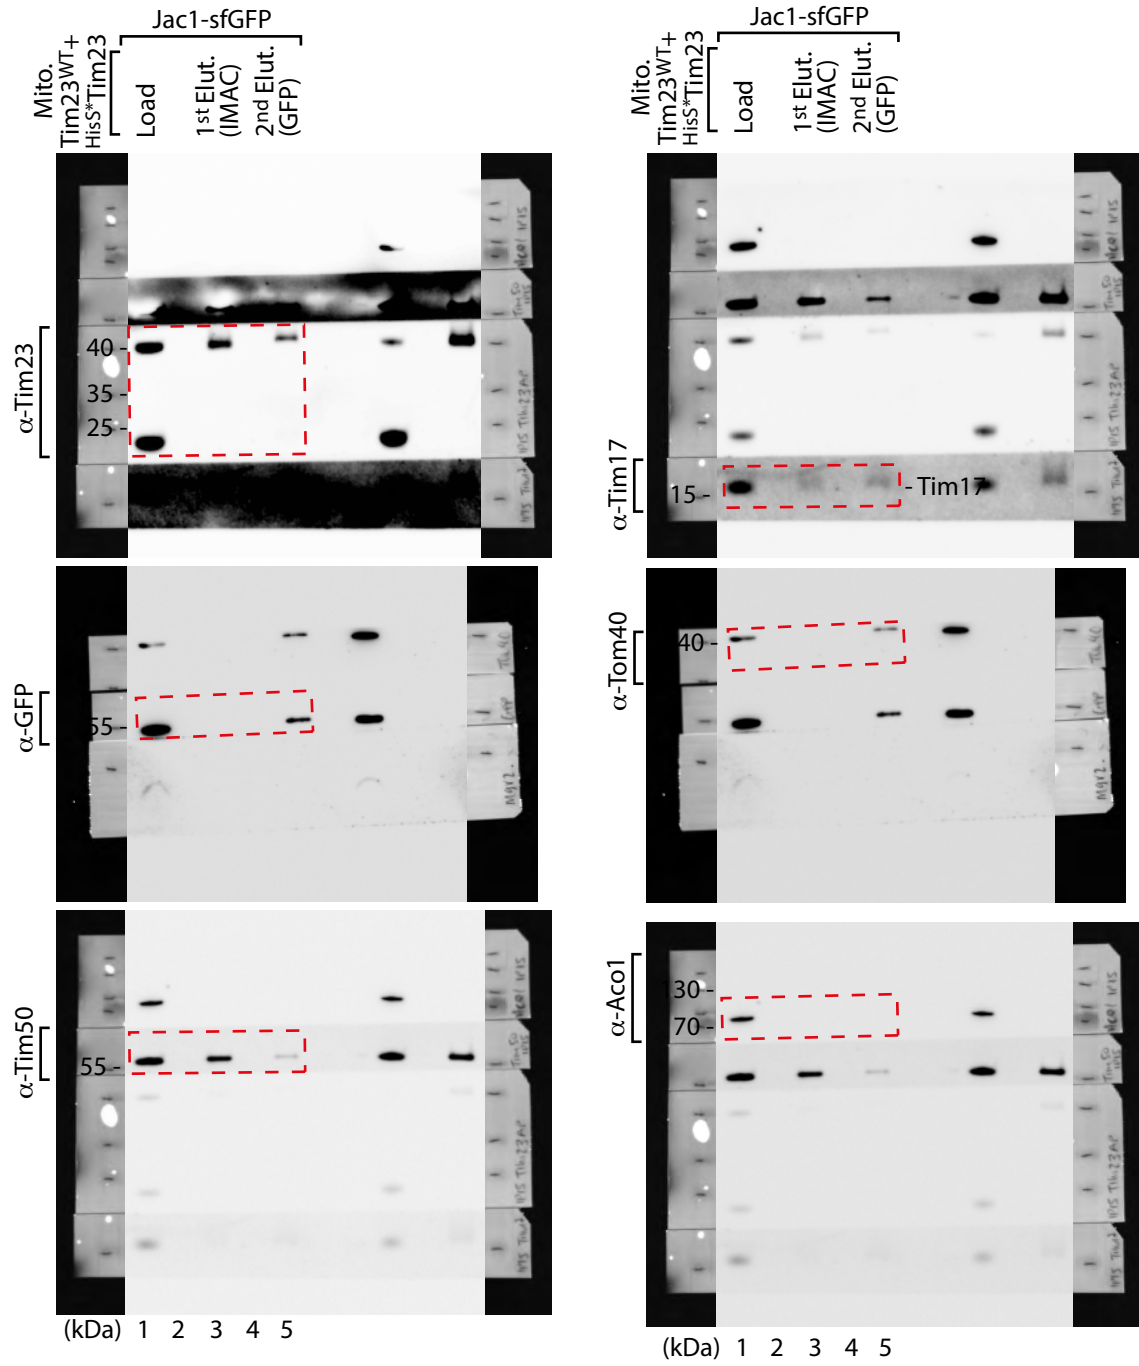

**Figure 3b**

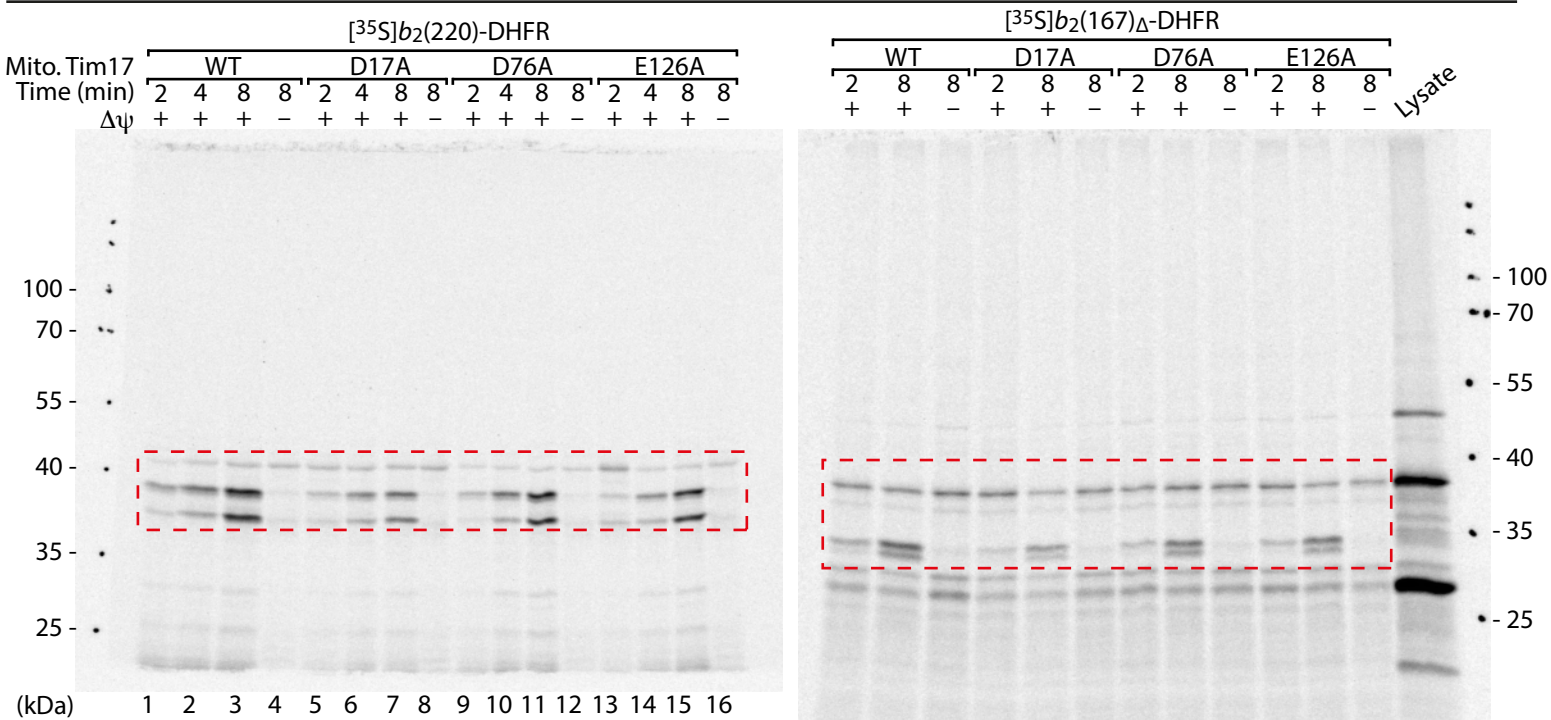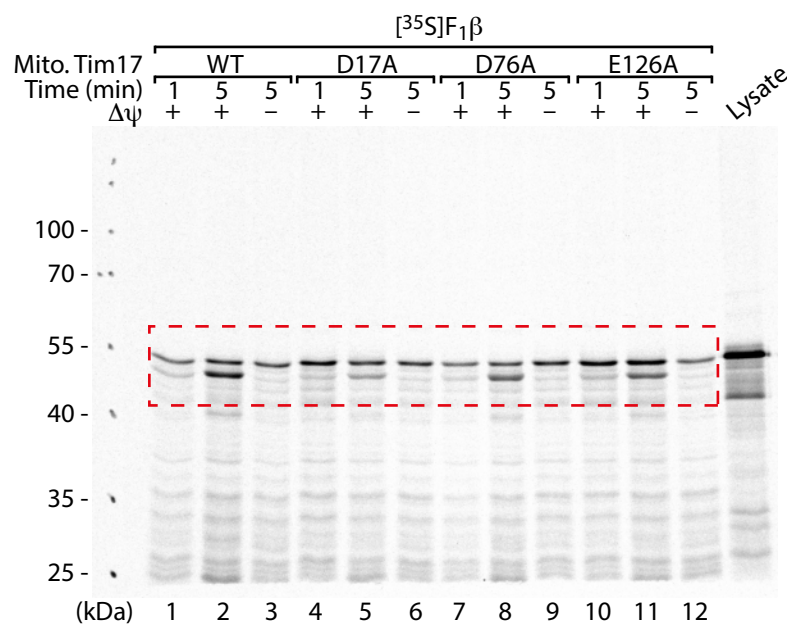

**Figure 3c**

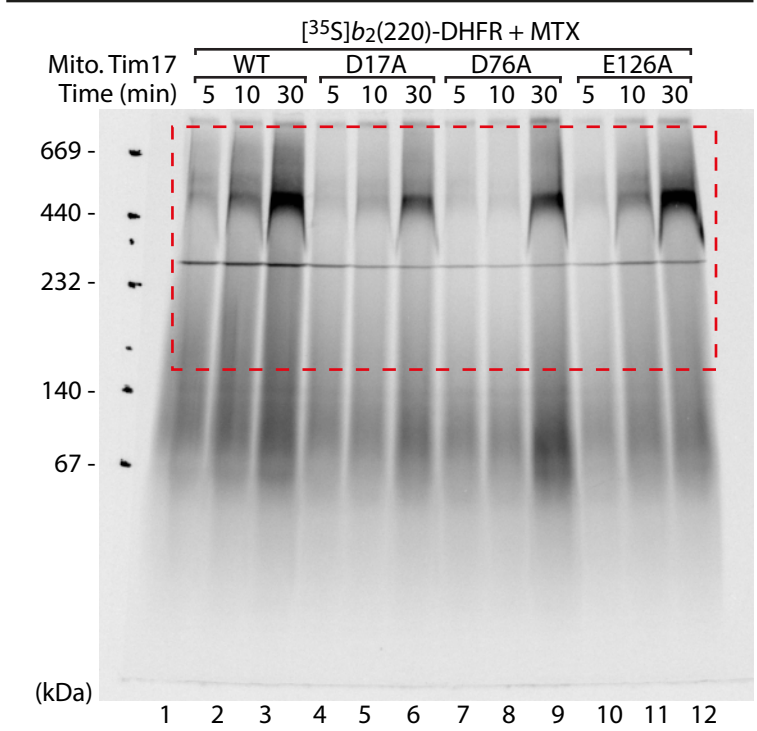



Figure 4b

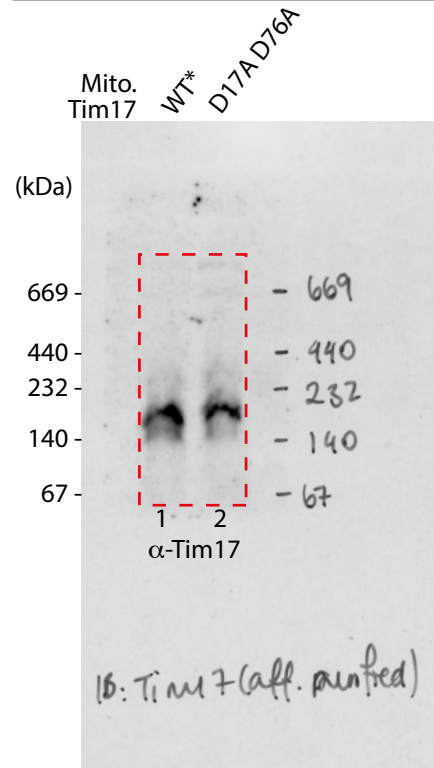

Figure 4c

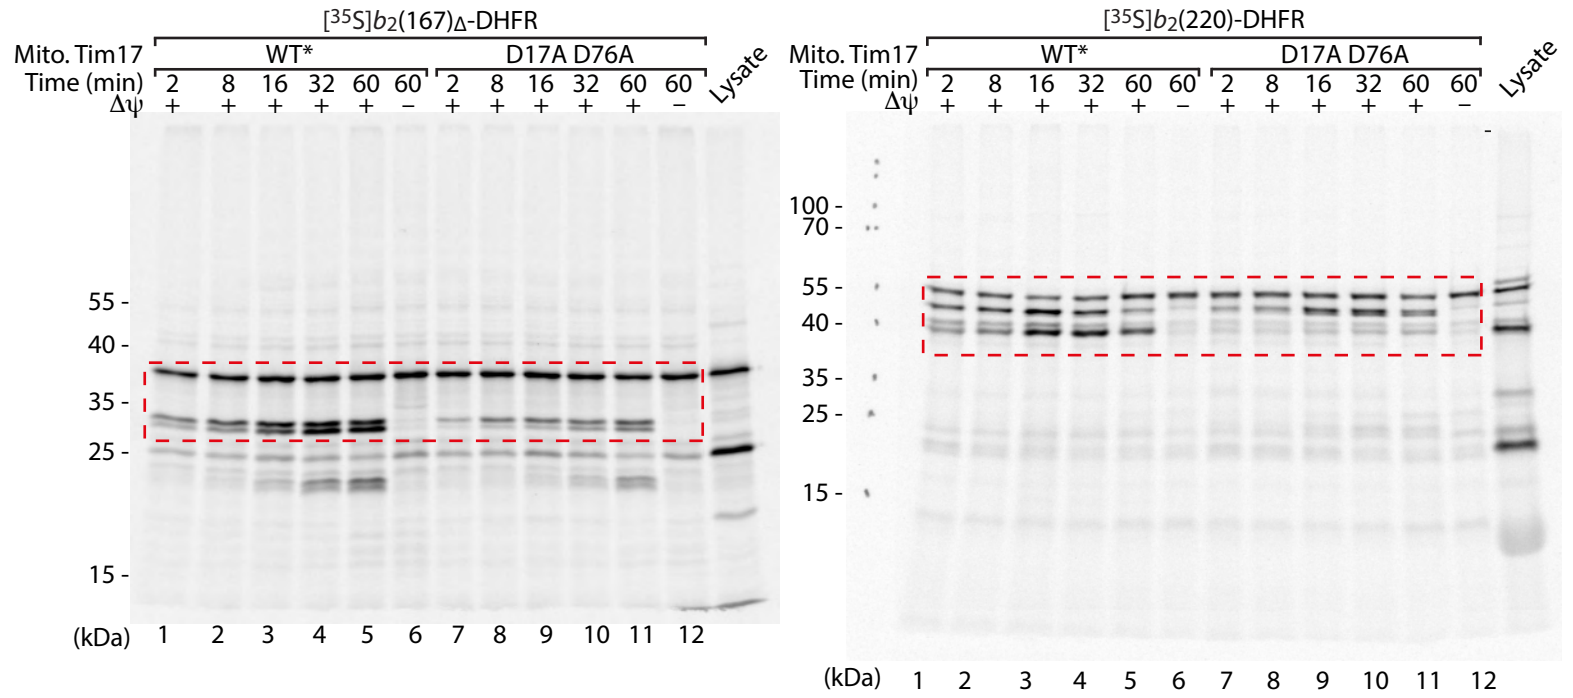

Figure 4d

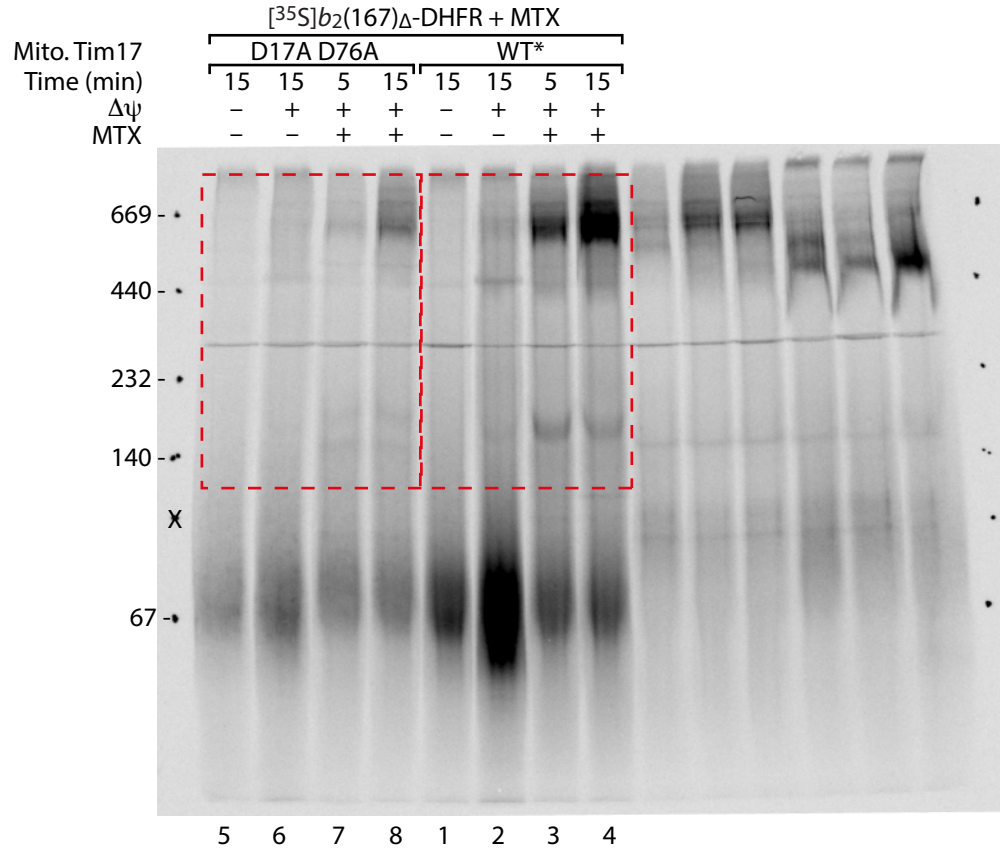

Figure 4e

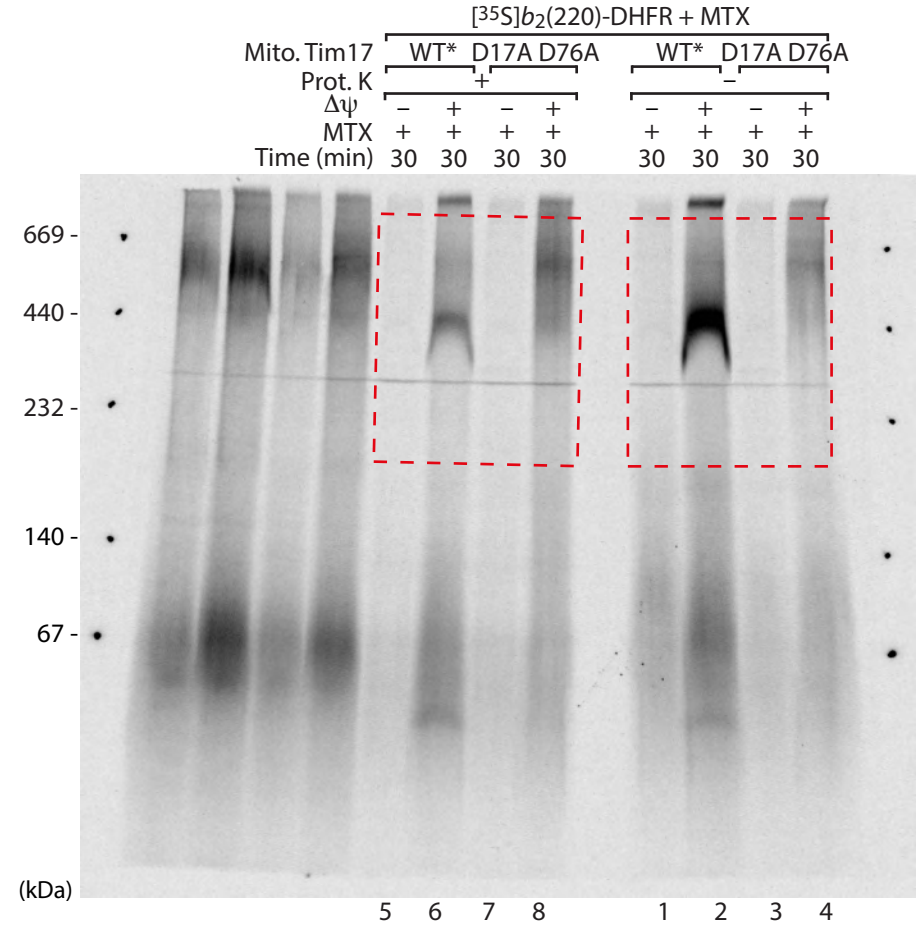

**Figure 5b**

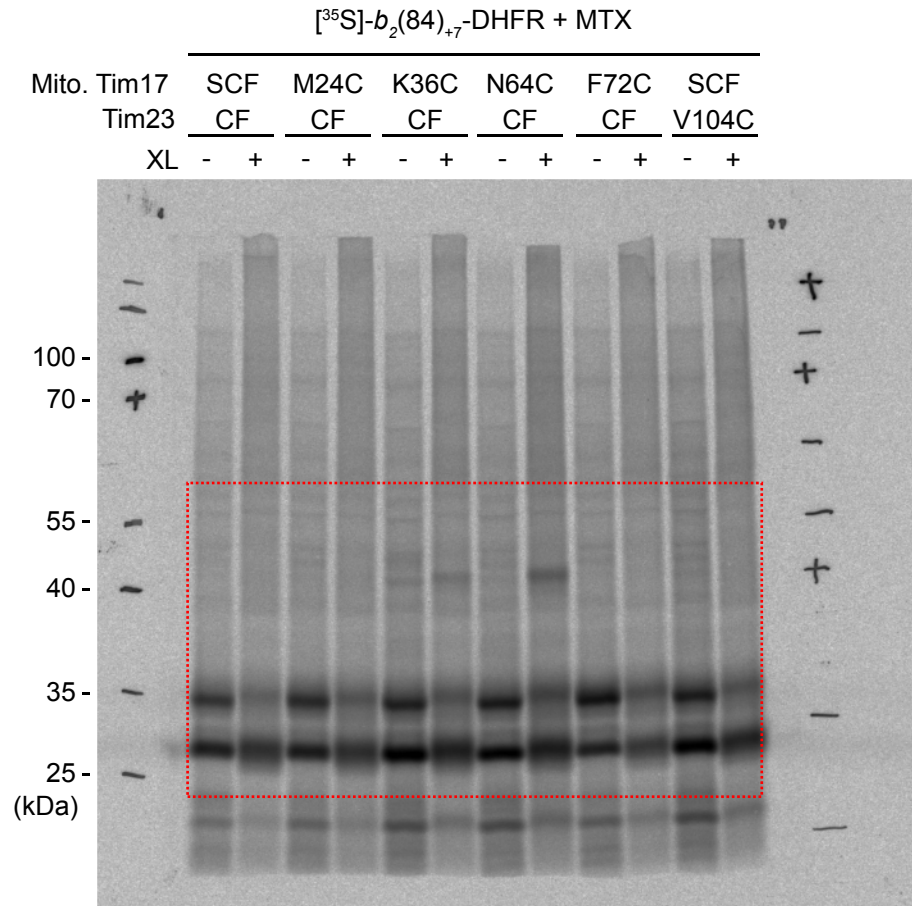

**Figure 5c**

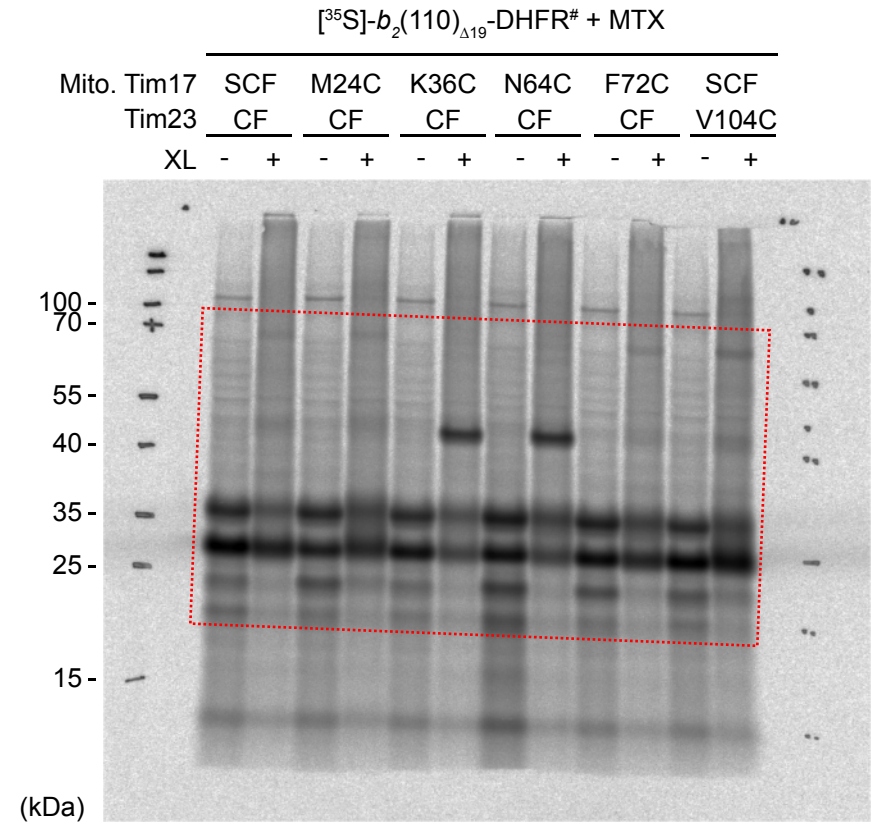



Figure 5d

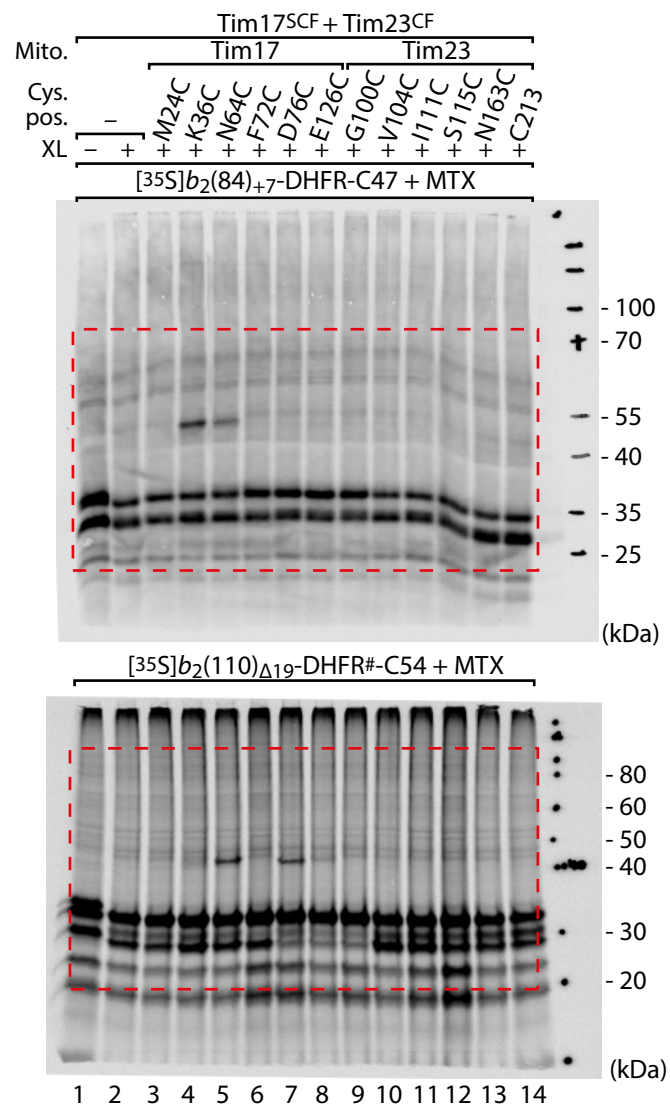

Extended Data Figure 1a

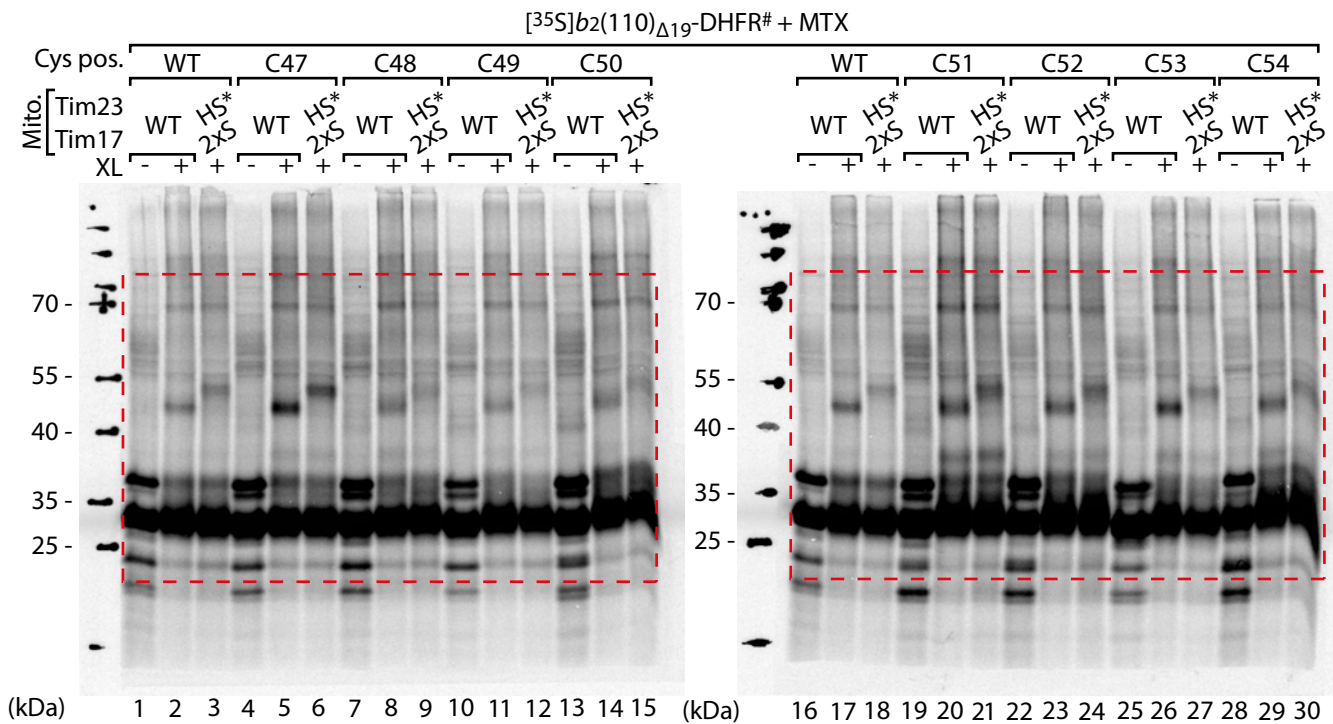

Extended Data Figure 1b

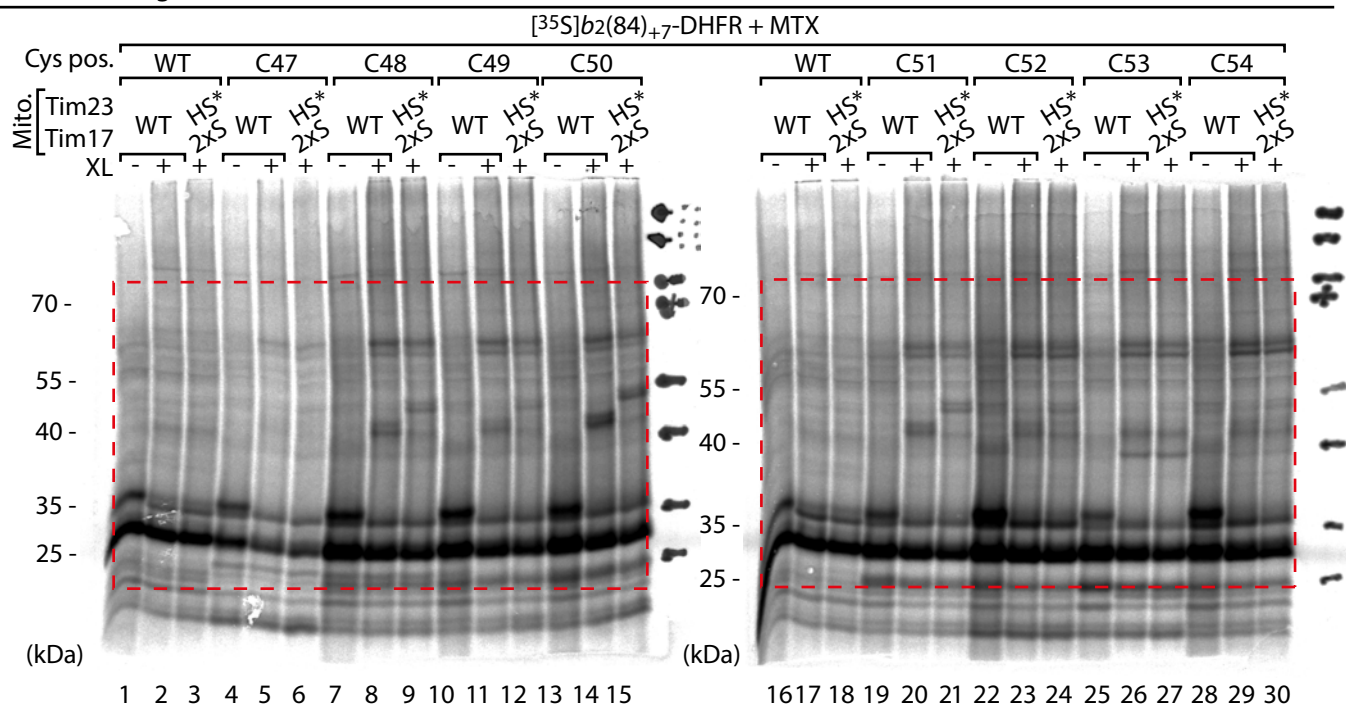

Extended Data Figure 1c

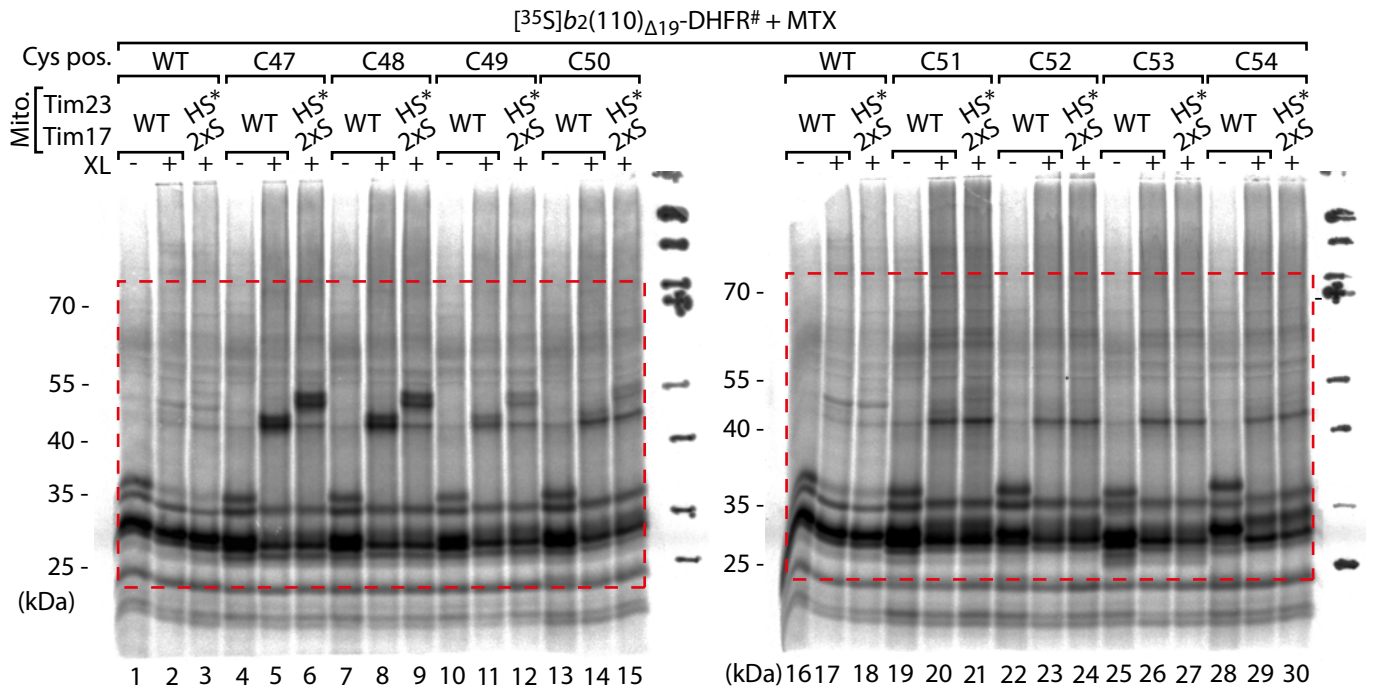

Extended Data Figure 1d

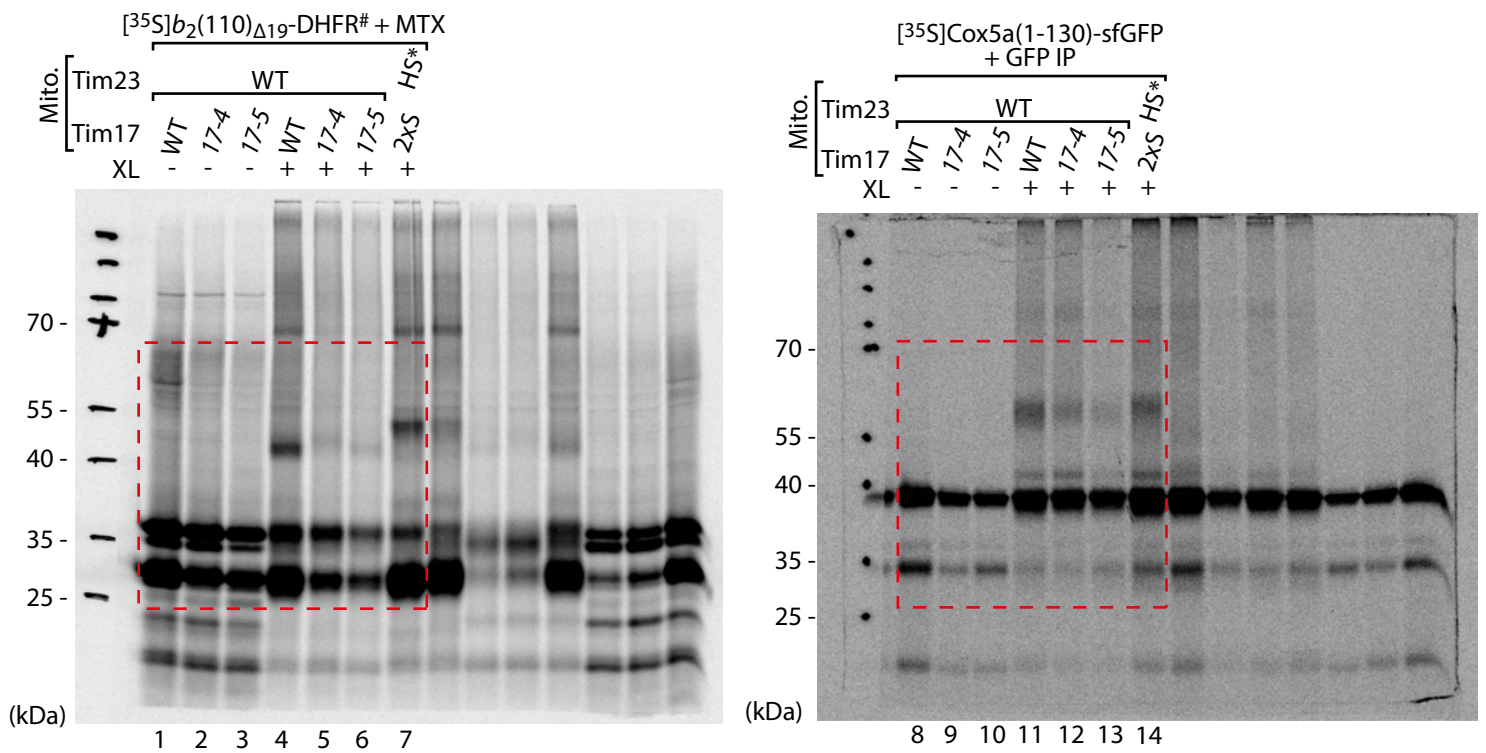

## Extended Data figure 2c

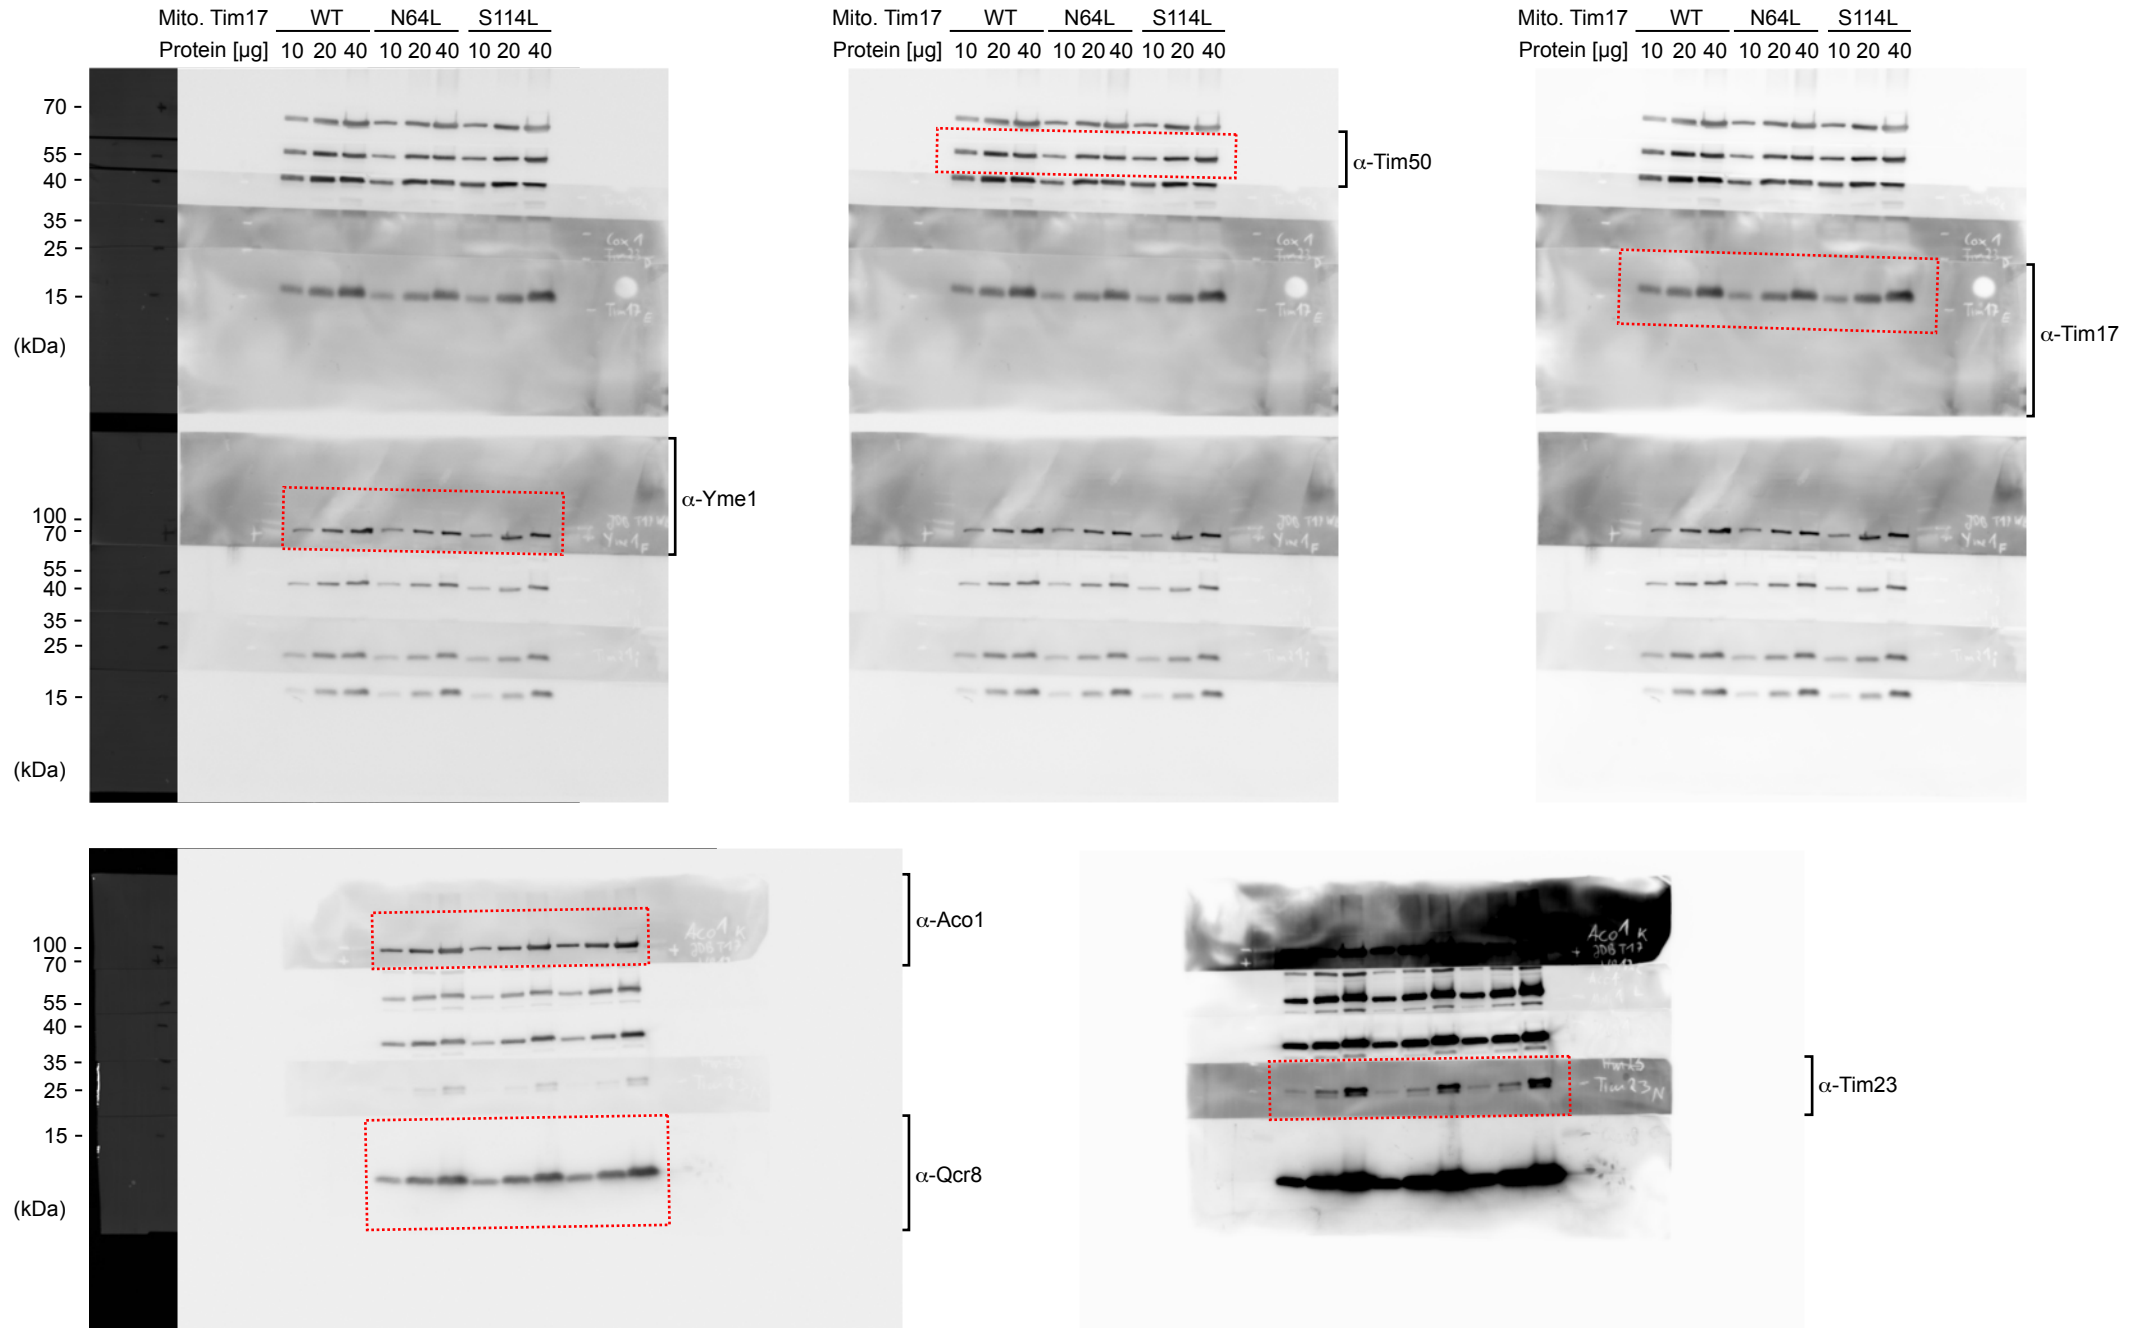



Extended Data figure 2e

Top panel

[<sup>35</sup>S]-Dic1

| Mito. Tim17 | WT  |   |   | N64L |   |   |
|-------------|-----|---|---|------|---|---|
| Time (min)  | 2,5 | 5 | 5 | 2,5  | 5 | 5 |
| ΔΨ          | +   | + | - | +    | + | - |

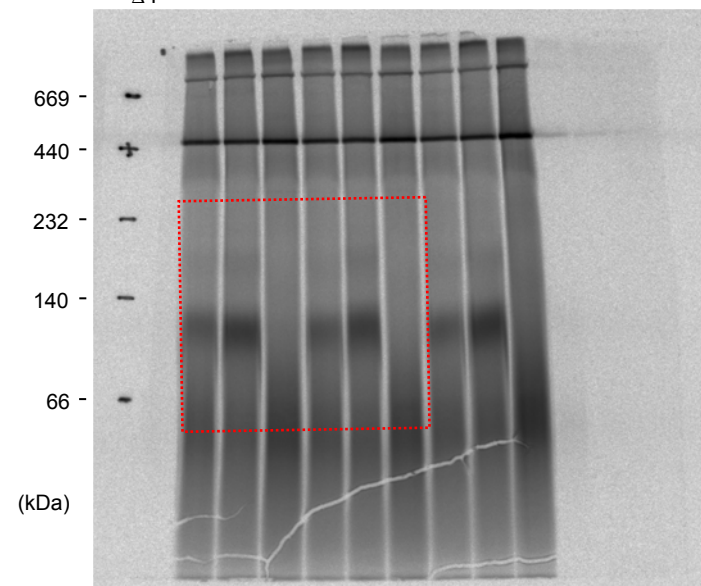

Bottom panel

[<sup>35</sup>S]-Dic1

| Mito. Tim17 | WT  |   |   | S114L |   |   |
|-------------|-----|---|---|-------|---|---|
| Time (min)  | 2,5 | 5 | 5 | 2,5   | 5 | 5 |
| ΔΨ          | +   | + | - | +     | + | - |

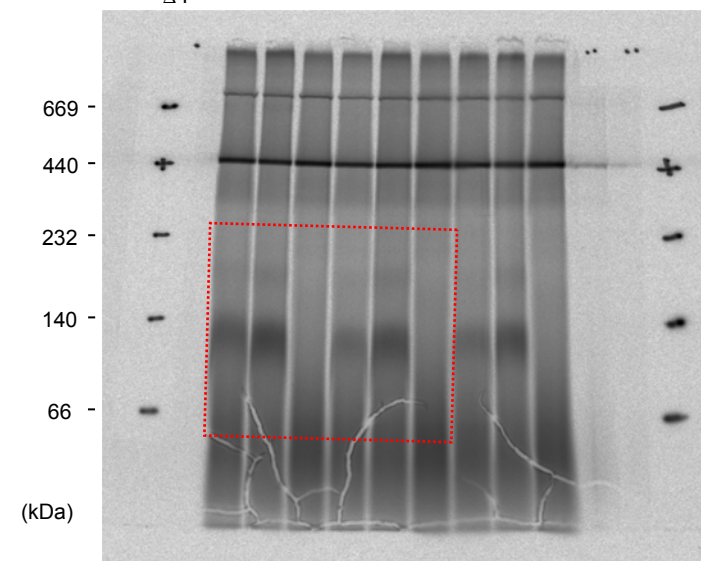

Extended Data figure 2f

1st panel

[<sup>35</sup>S]-b<sub>2</sub>(167)-DHFR

+ Prot. K

| Mito. Tim17 | WT |   |    |    | N64L |   |    |    |
|-------------|----|---|----|----|------|---|----|----|
| Time (min)  | 2  | 5 | 10 | 10 | 2    | 5 | 10 | 10 |
| ΔΨ          | +  | + | +  | -  | +    | + | +  | -  |

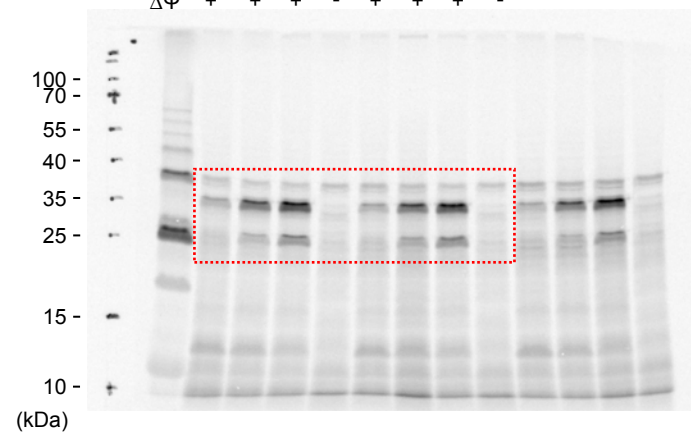

3rd panel

[<sup>35</sup>S]-Cyt c<sub>1</sub>

+ Prot. K

| Mito. Tim17 | WT |  |  |  | N64L |  |  |  |
|-------------|----|--|--|--|------|--|--|--|
|-------------|----|--|--|--|------|--|--|--|

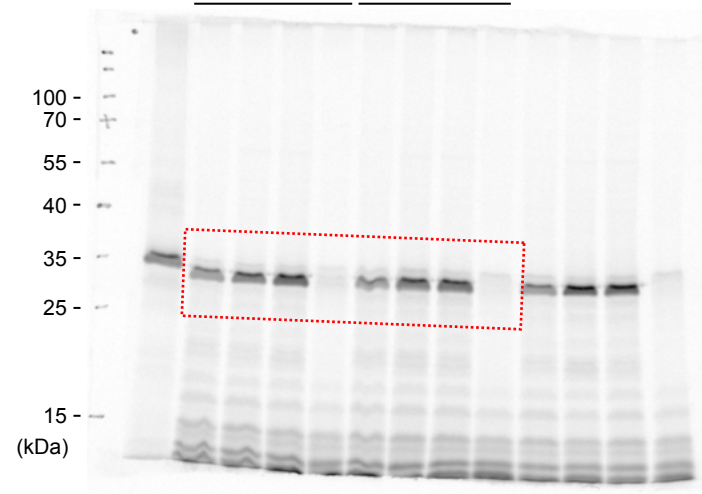

2nd panel

[<sup>35</sup>S]-b<sub>2</sub>(167)-DHFR

+ Prot. K

| Mito. Tim17 | WT |   |    |    | S114L |   |    |    |
|-------------|----|---|----|----|-------|---|----|----|
| Time (min)  | 2  | 5 | 10 | 10 | 2     | 5 | 10 | 10 |
| ΔΨ          | +  | + | +  | -  | +     | + | +  | -  |

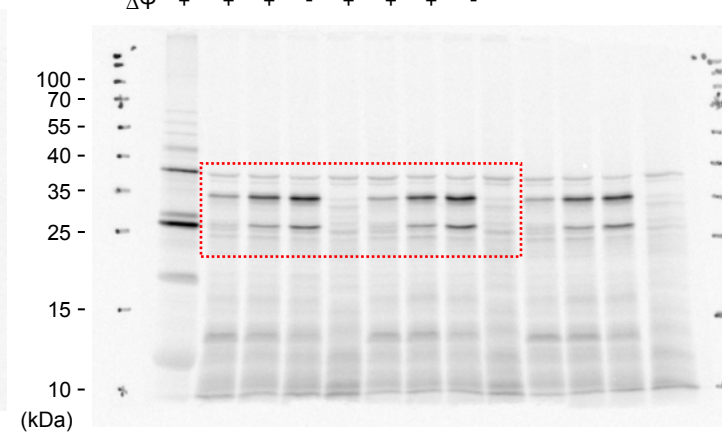

4th panel

[<sup>35</sup>S]-Cyt c<sub>1</sub>

+ Prot. K

| Mito. Tim17 | WT |  |  |  | S114L |  |  |  |
|-------------|----|--|--|--|-------|--|--|--|
|-------------|----|--|--|--|-------|--|--|--|

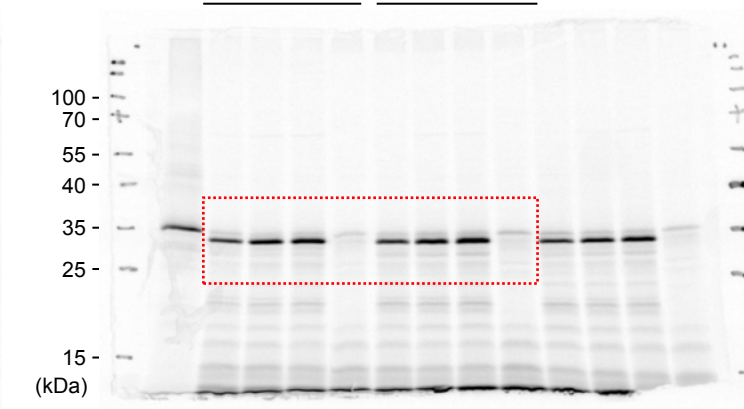

Extended Data Figure 3d

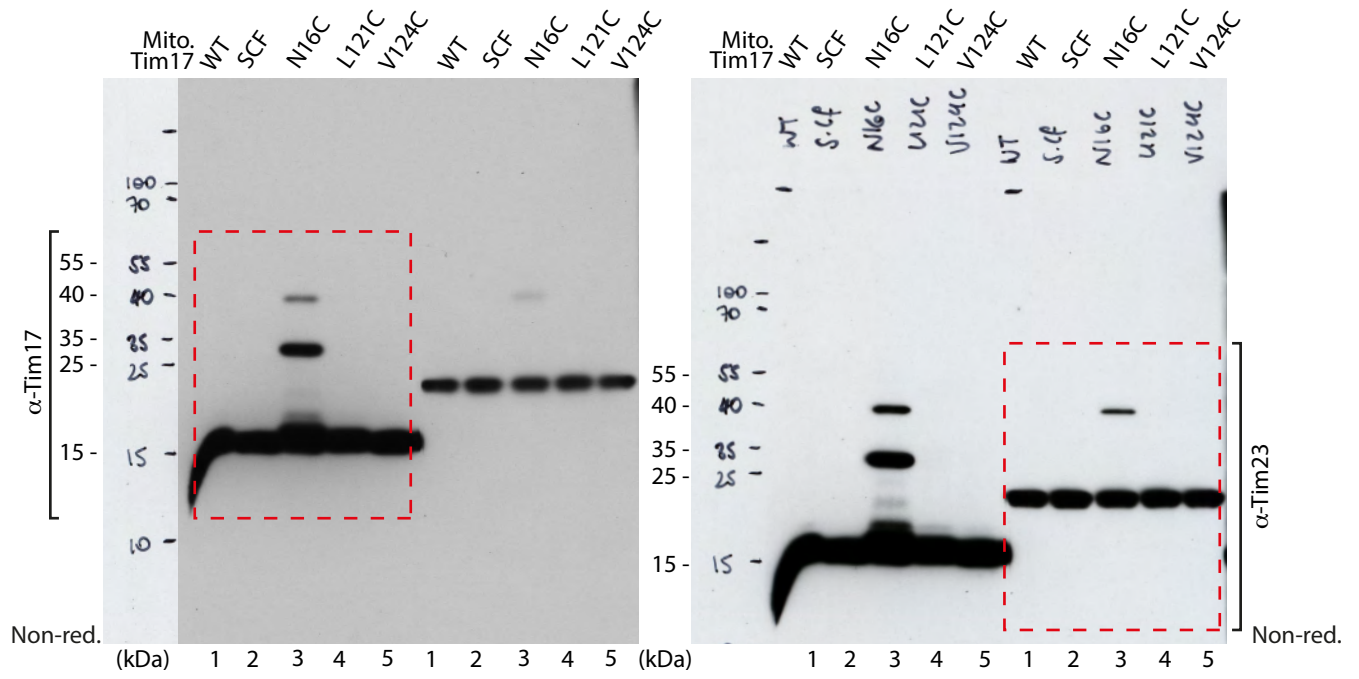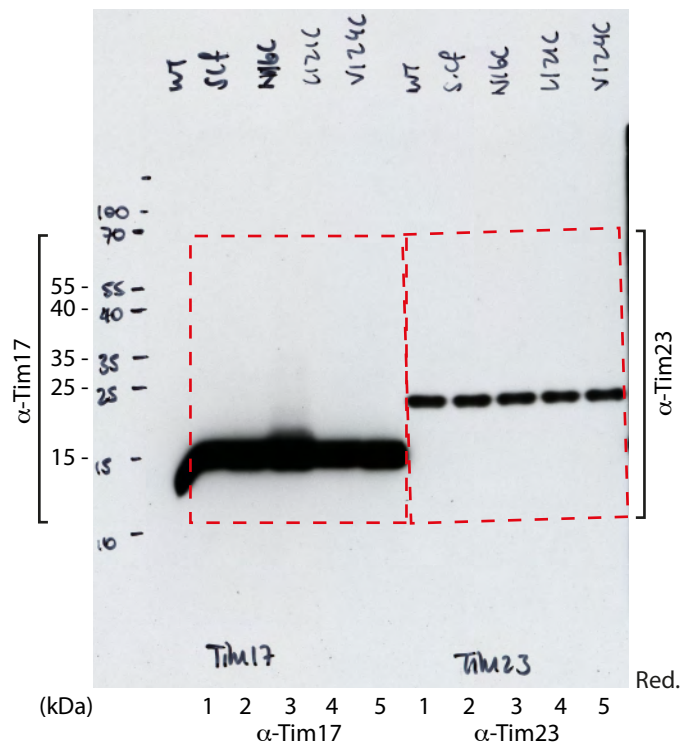

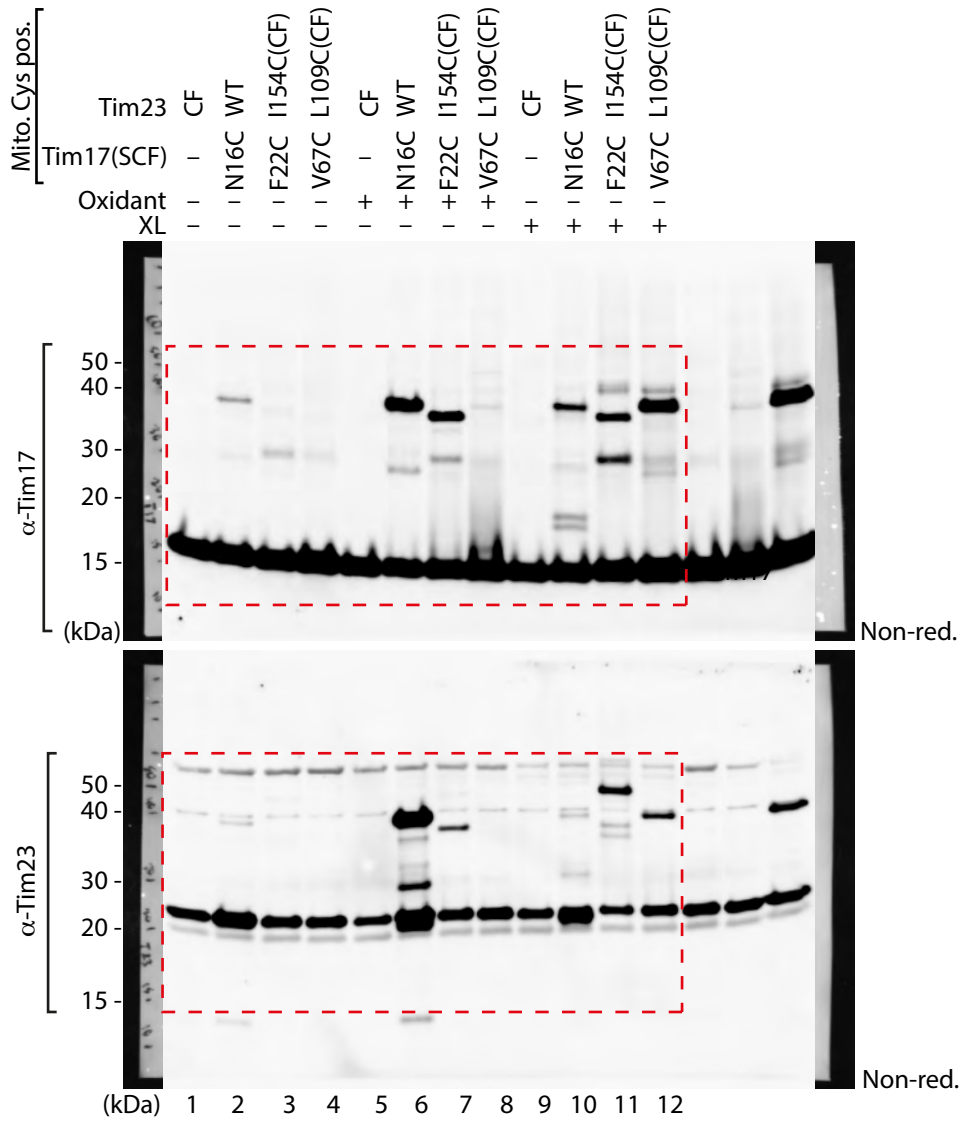

Extended Data Figure 6a

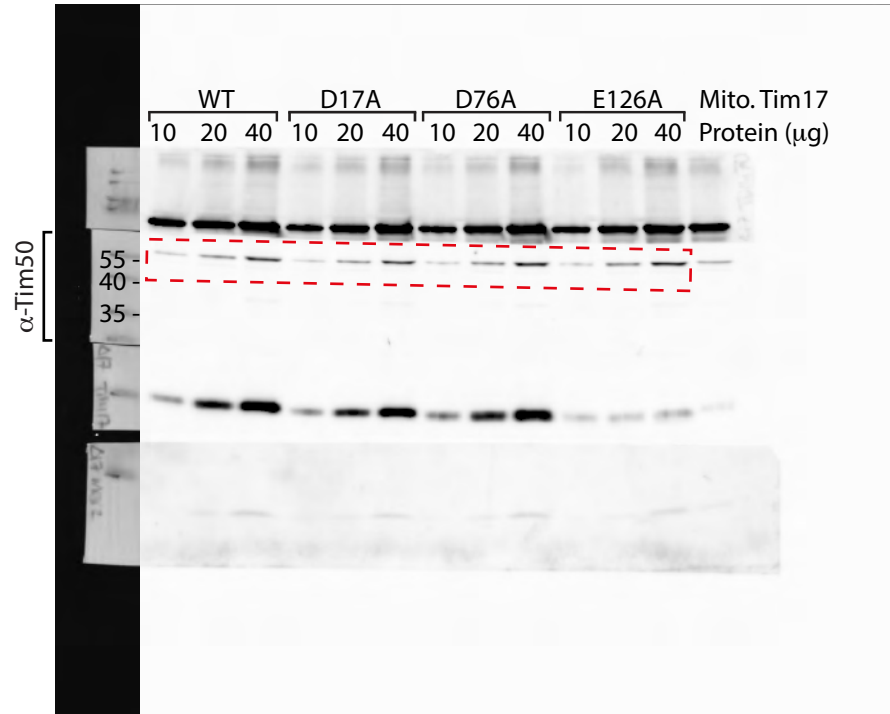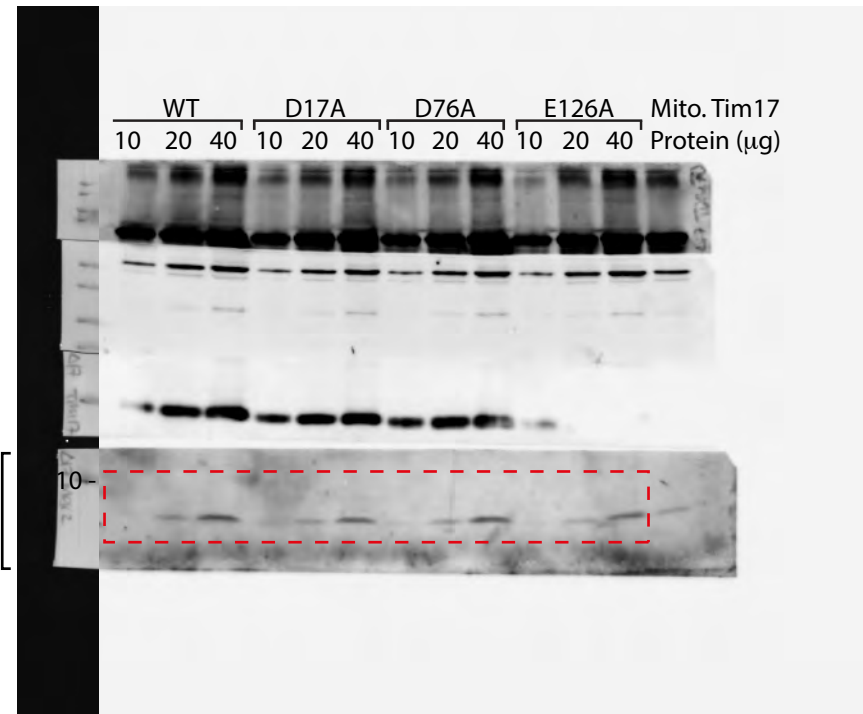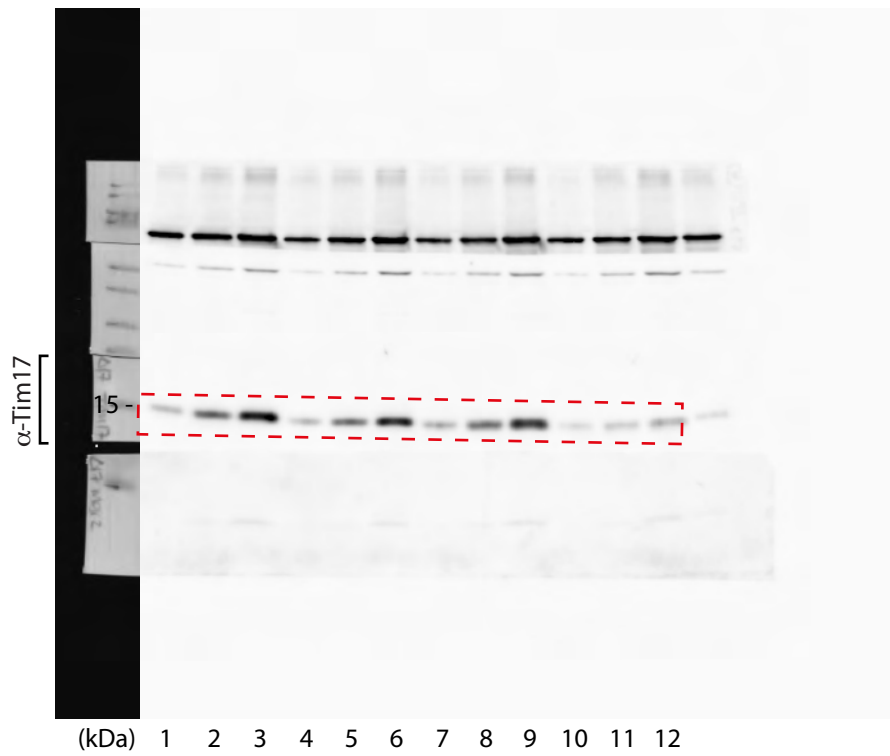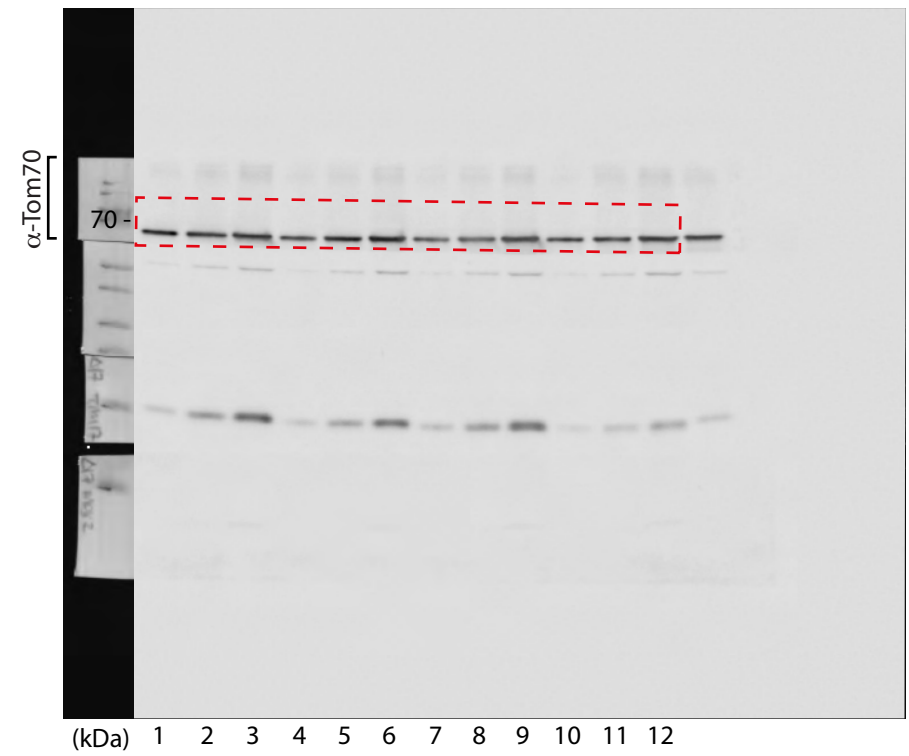





Extended Data Figure 6a

Mito. Tim17 WT D17A D76A E126A  
Protein (μg) 10 20 40 10 20 40 10 20 40 10 20 40

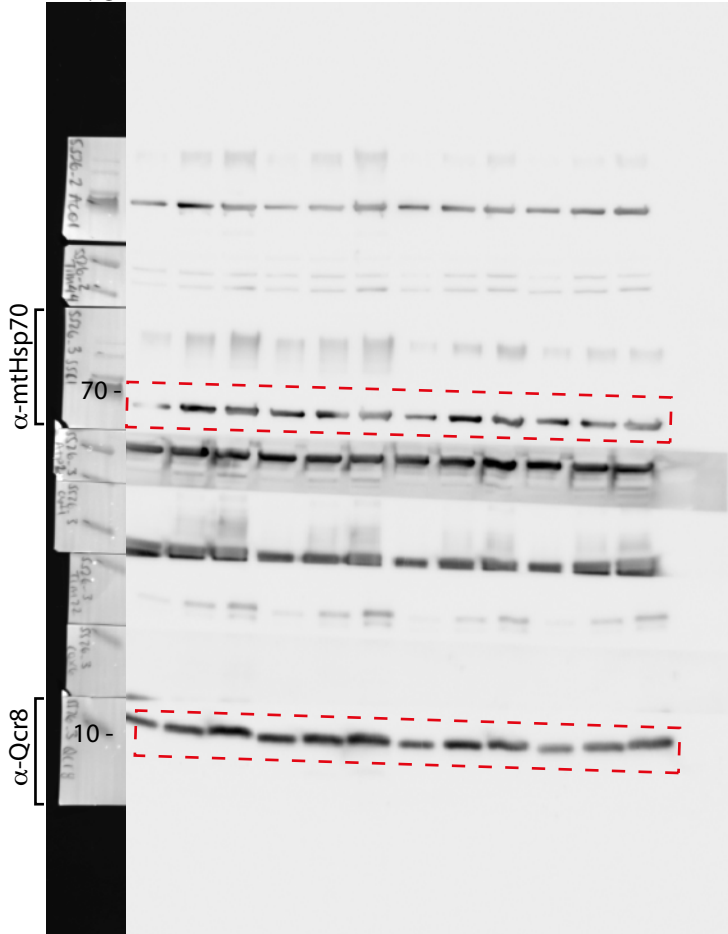

Mito. Tim17 WT D17A D76A E126A  
Protein (μg) 10 20 40 10 20 40 10 20 40 10 20 40

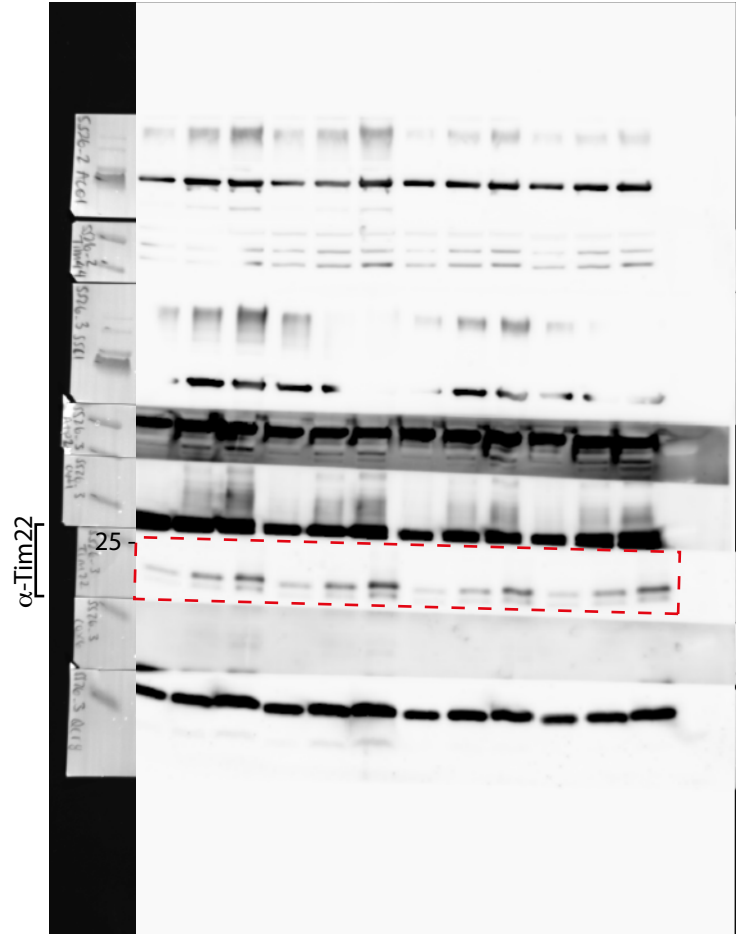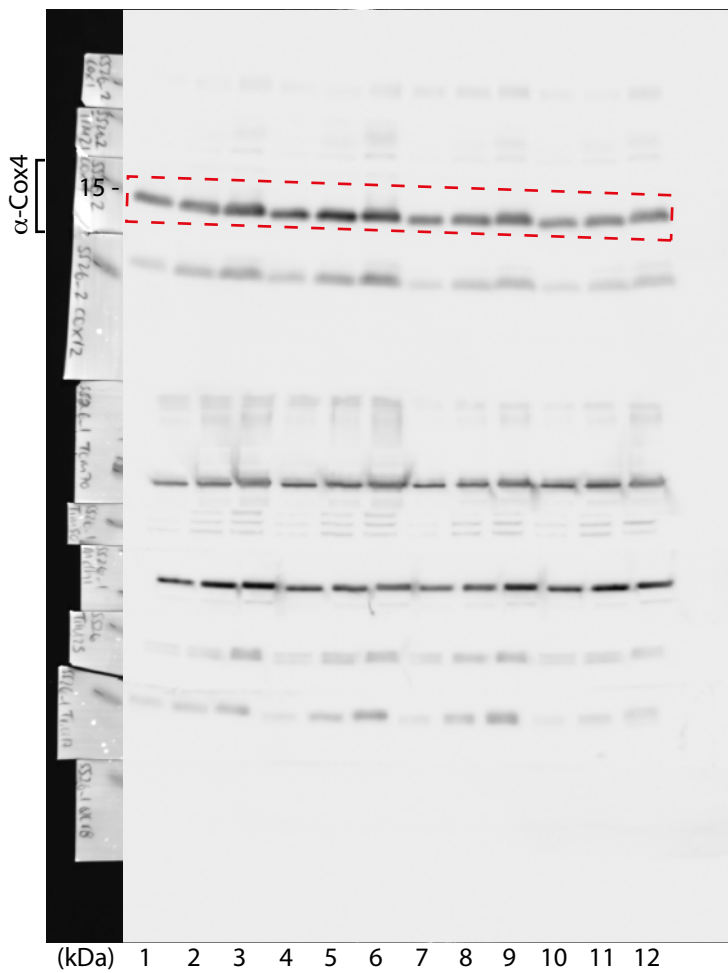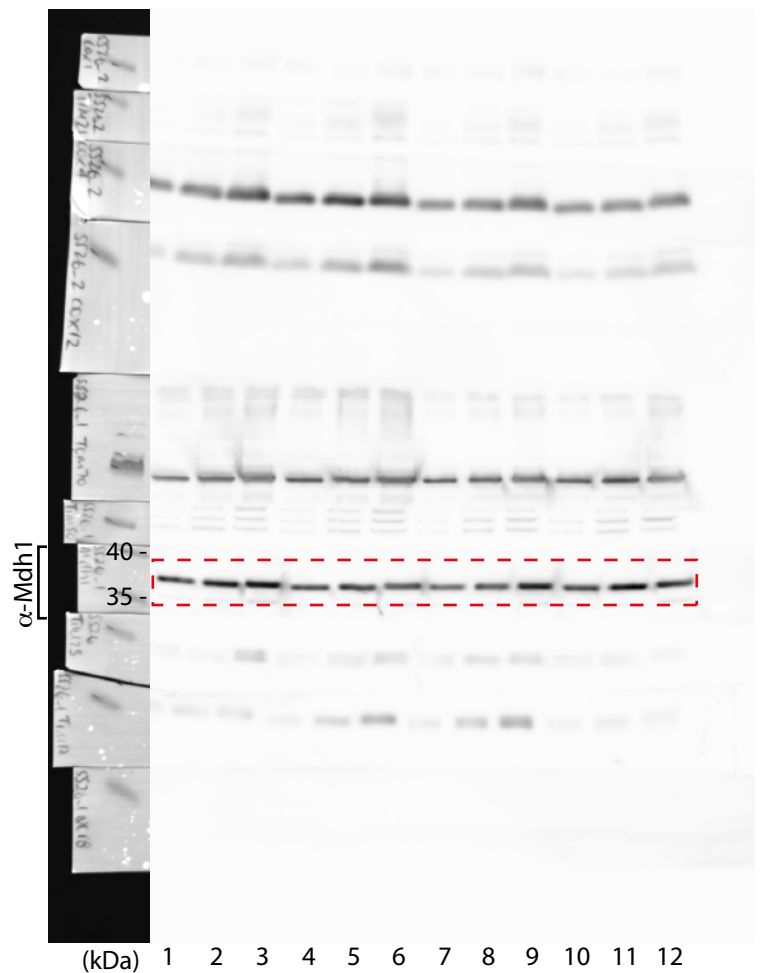

Extended Data Figure 6b

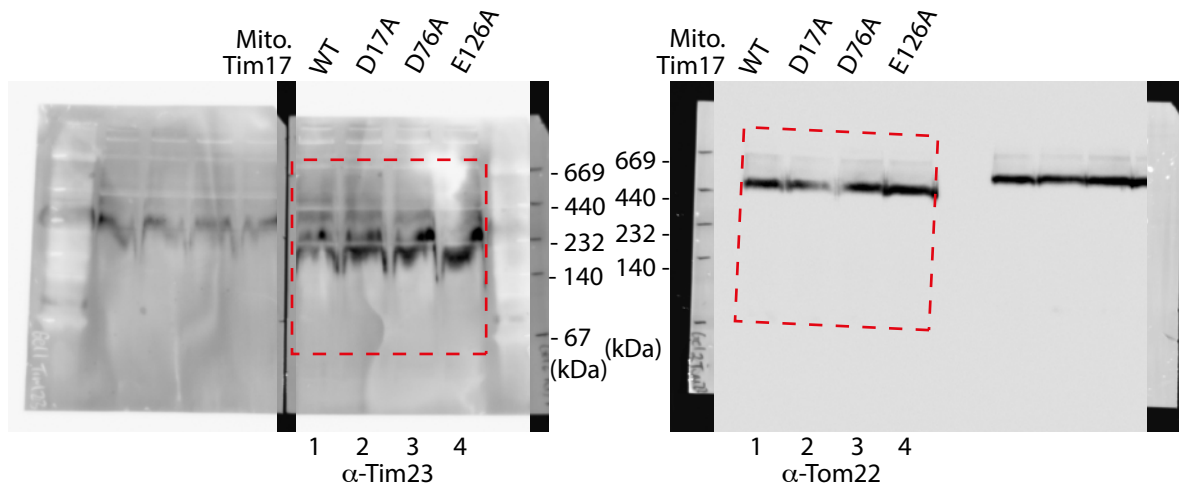

Extended Data Figure 6d

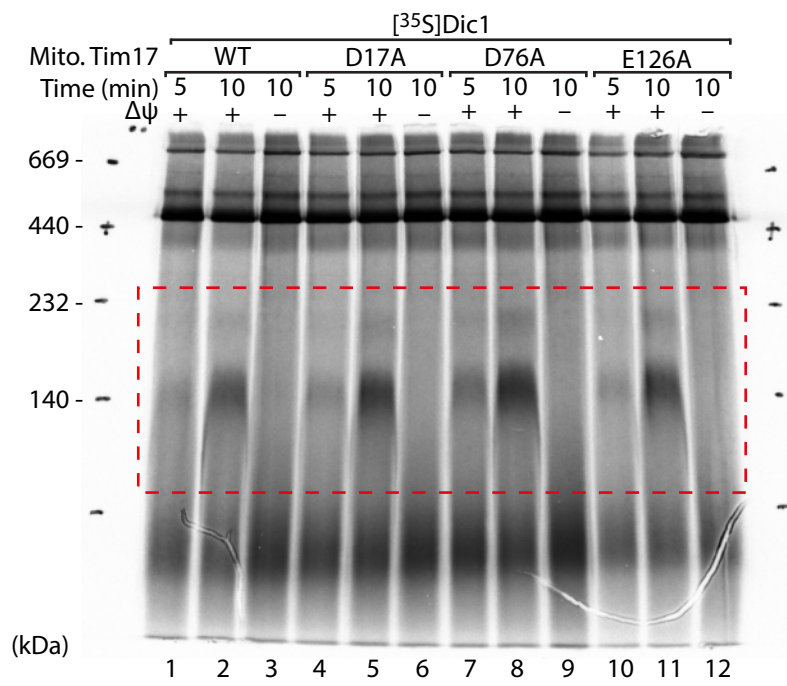

**Extended data Figure 6f**

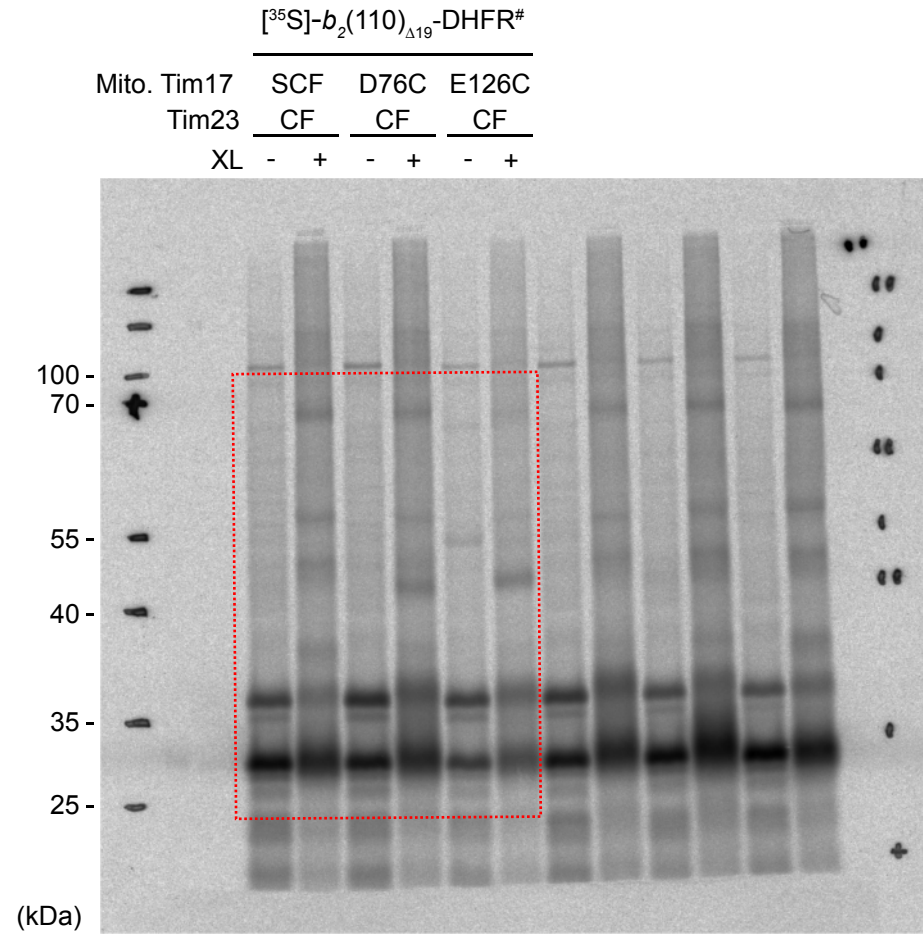

Extended Data Figure 7b

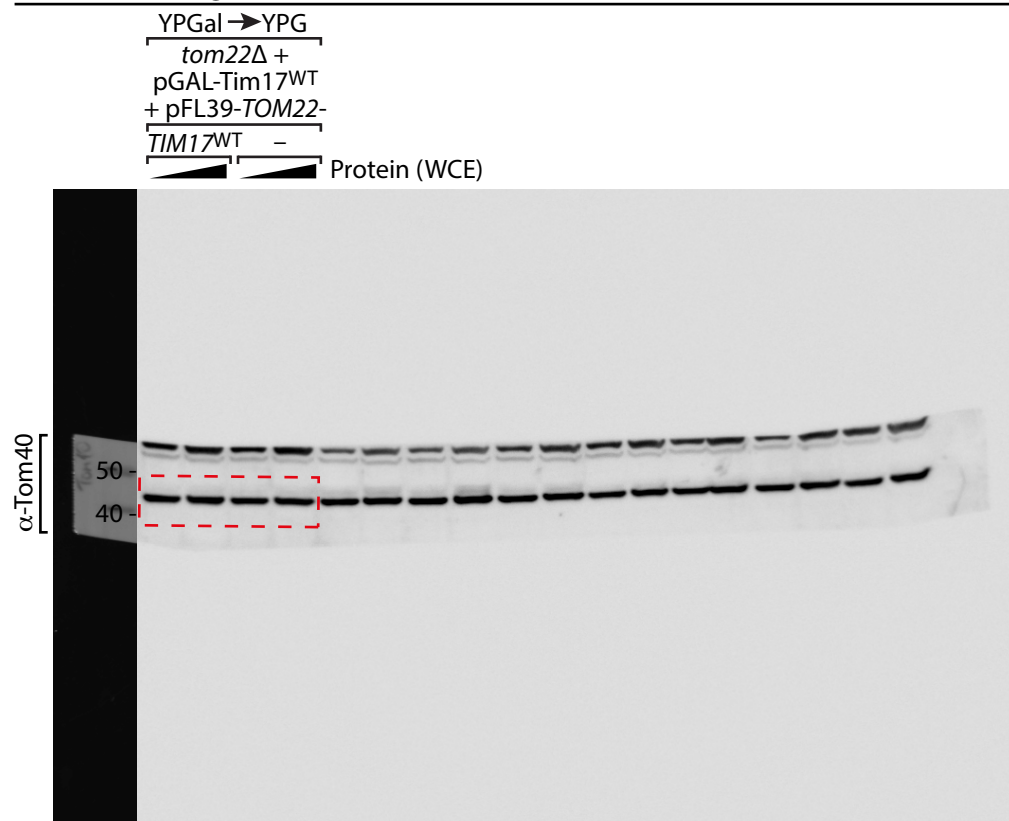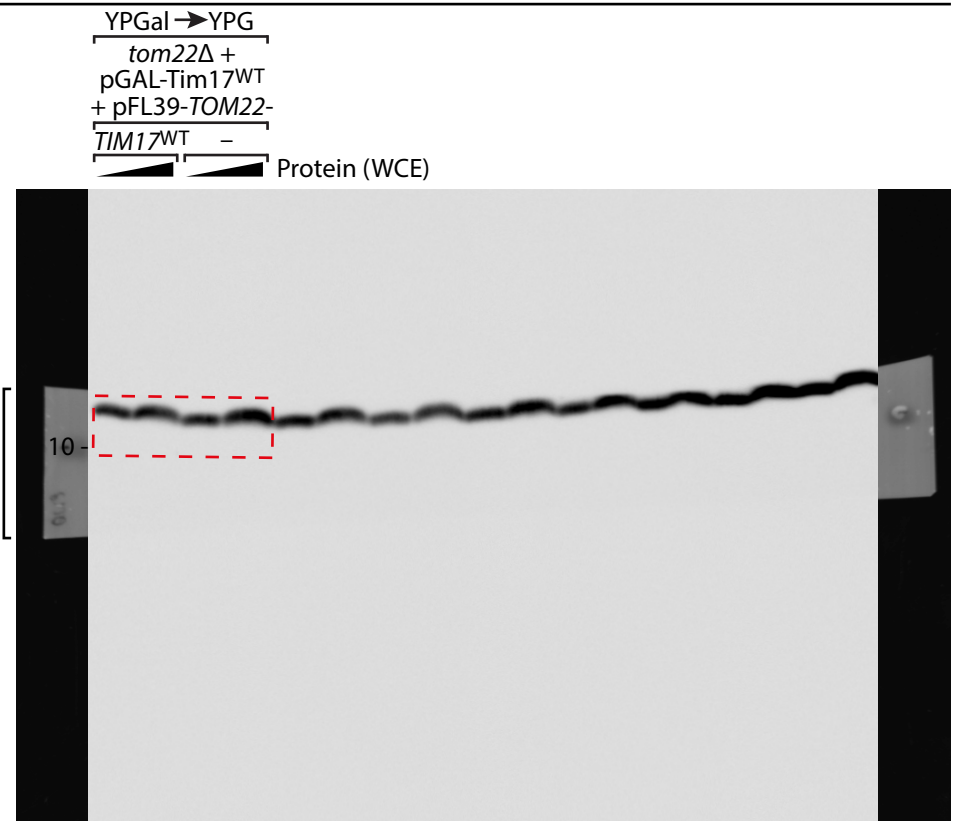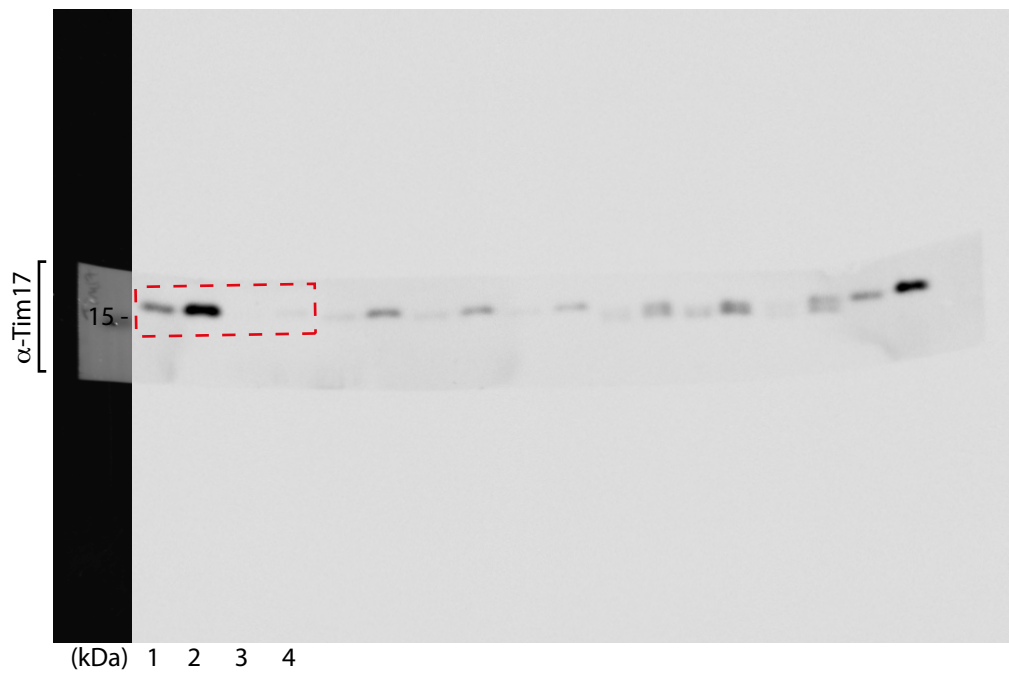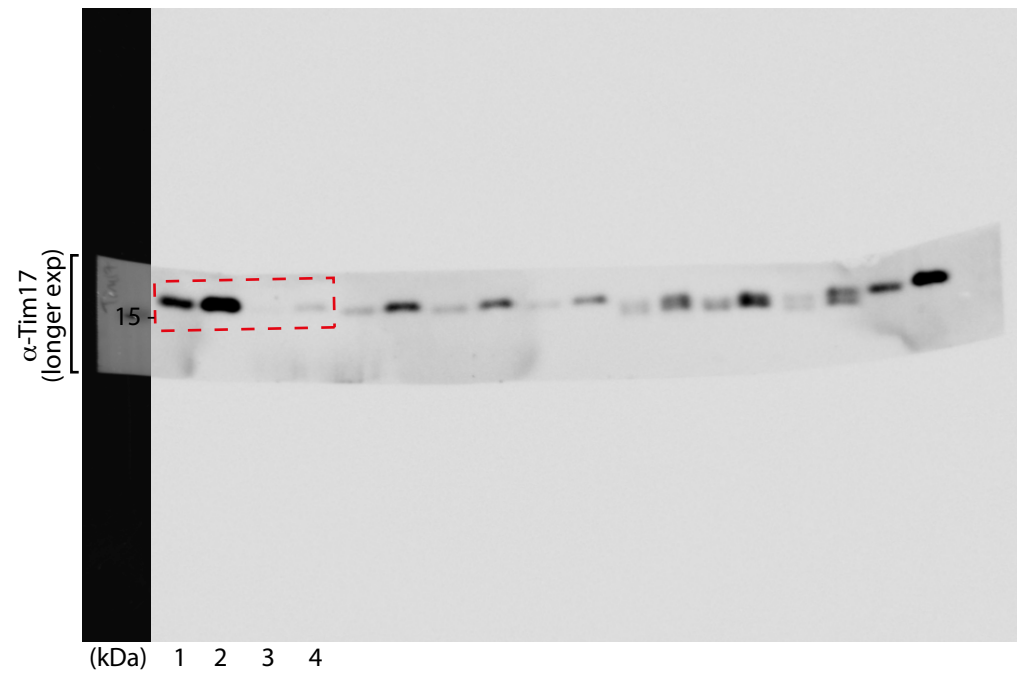



Extended Data Figure 7d

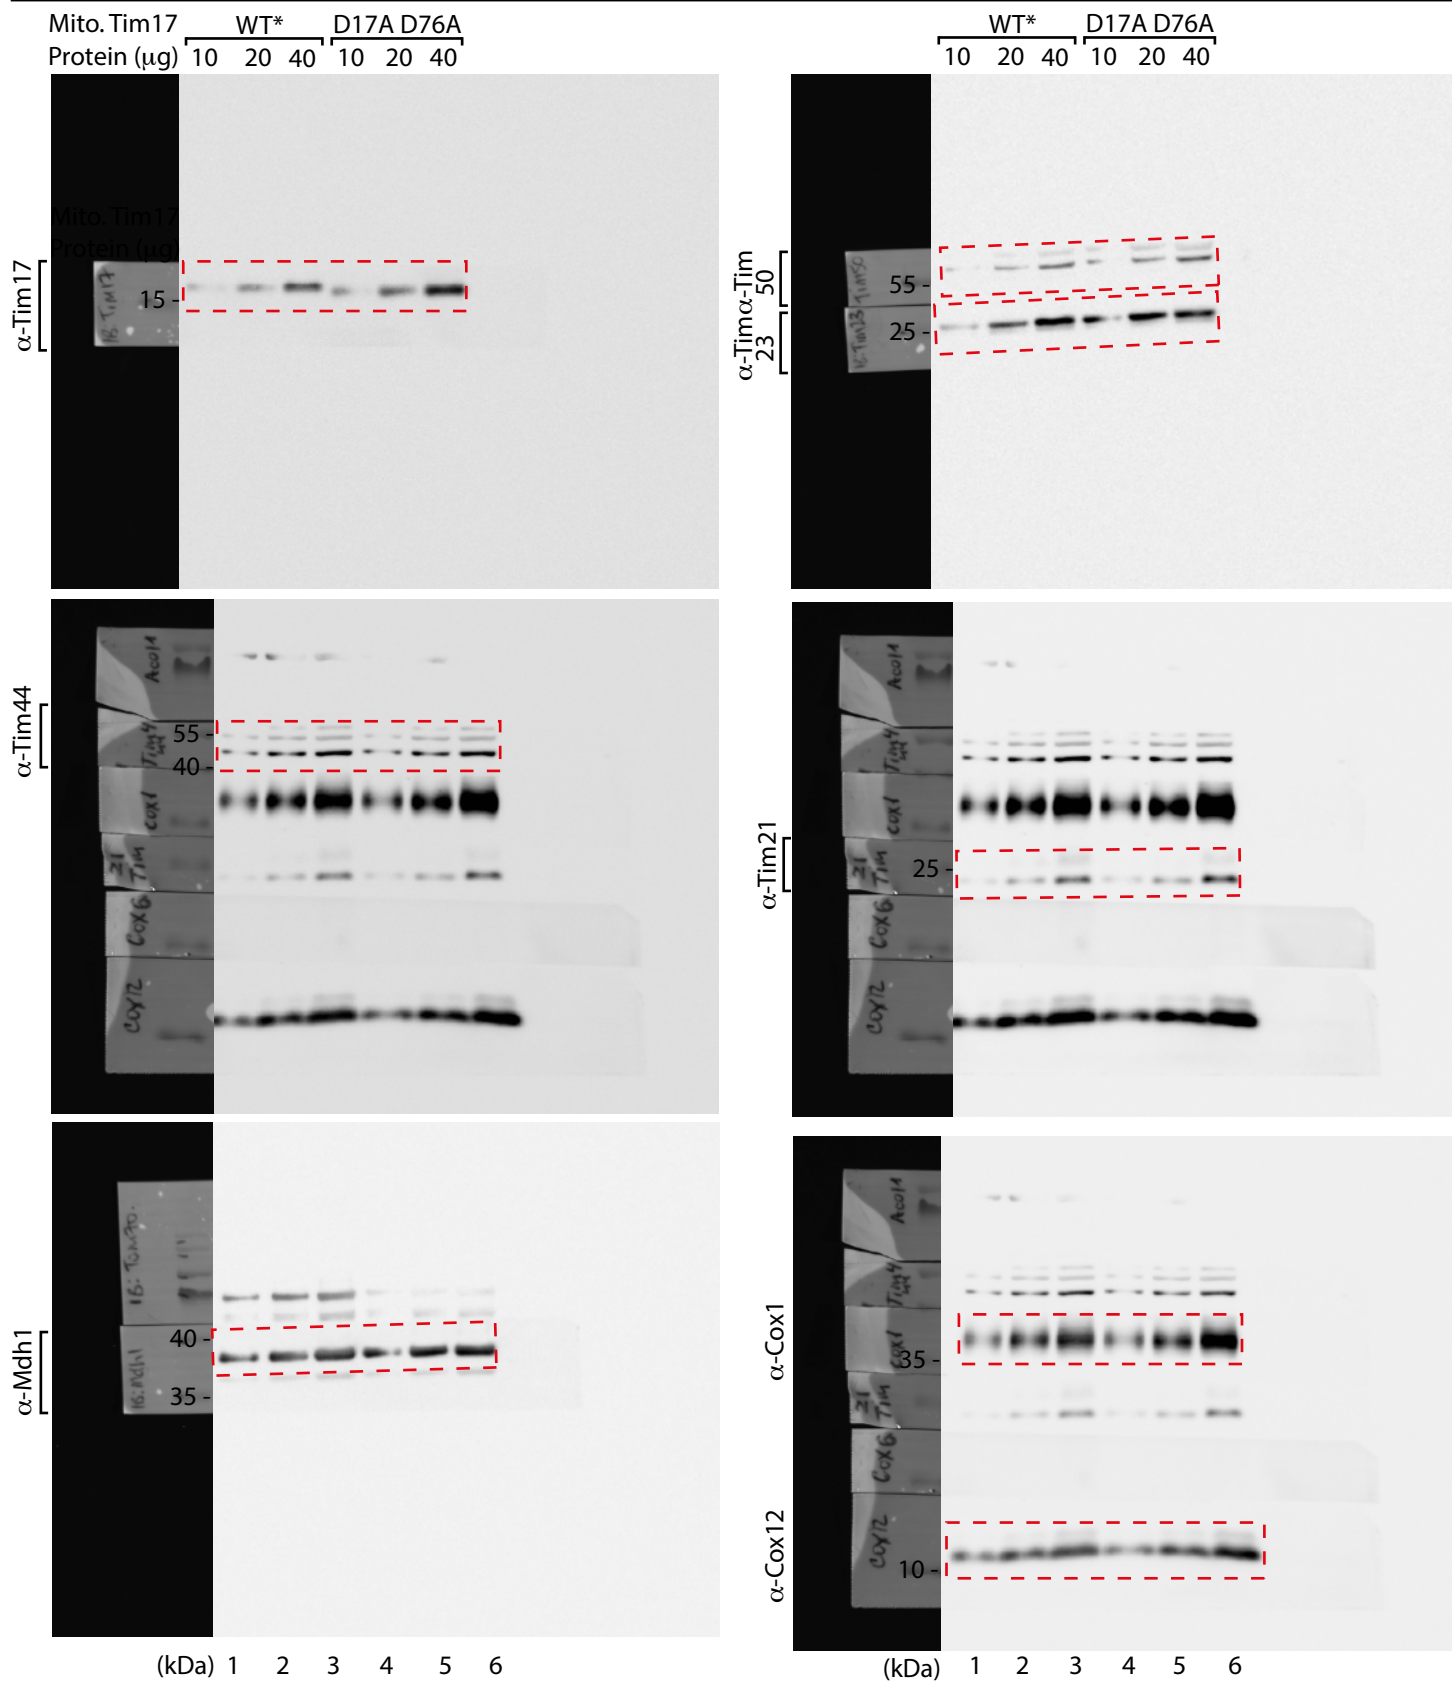

Extended Data Figure 7e

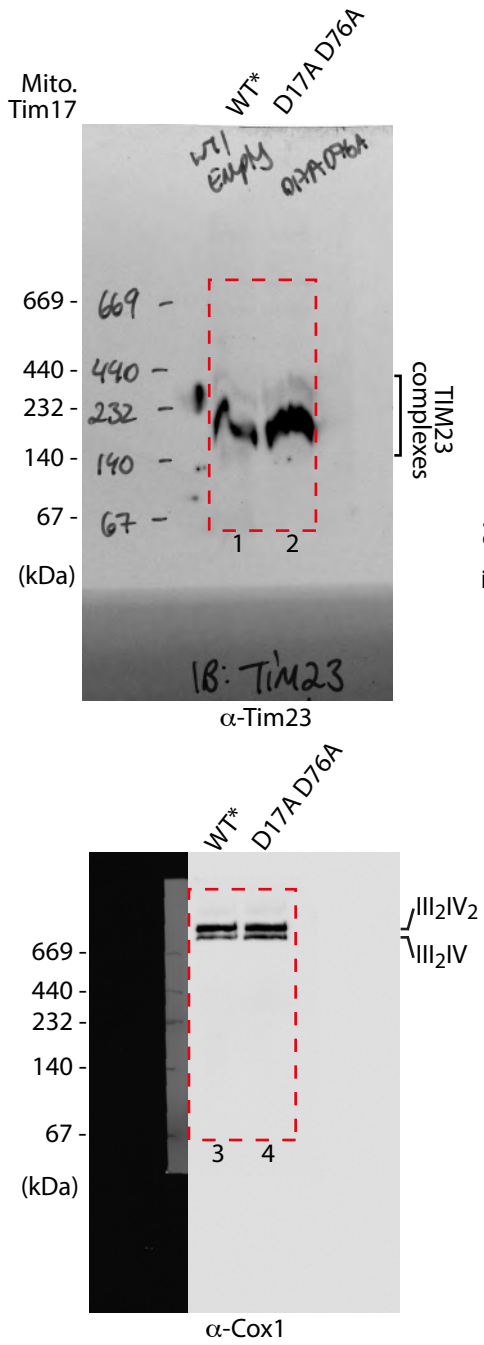

Extended Data Figure 7f

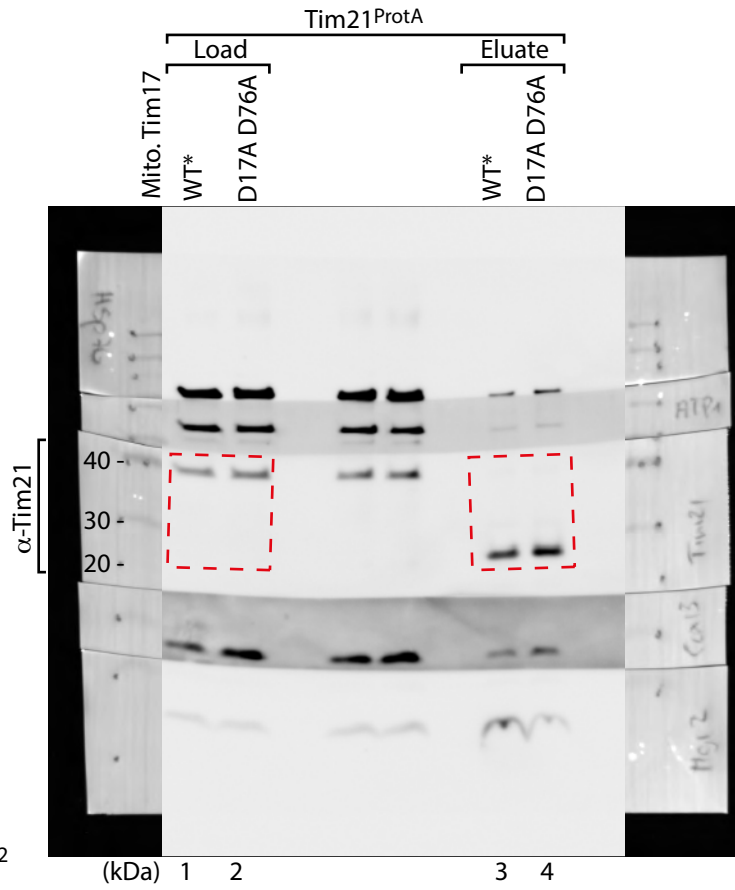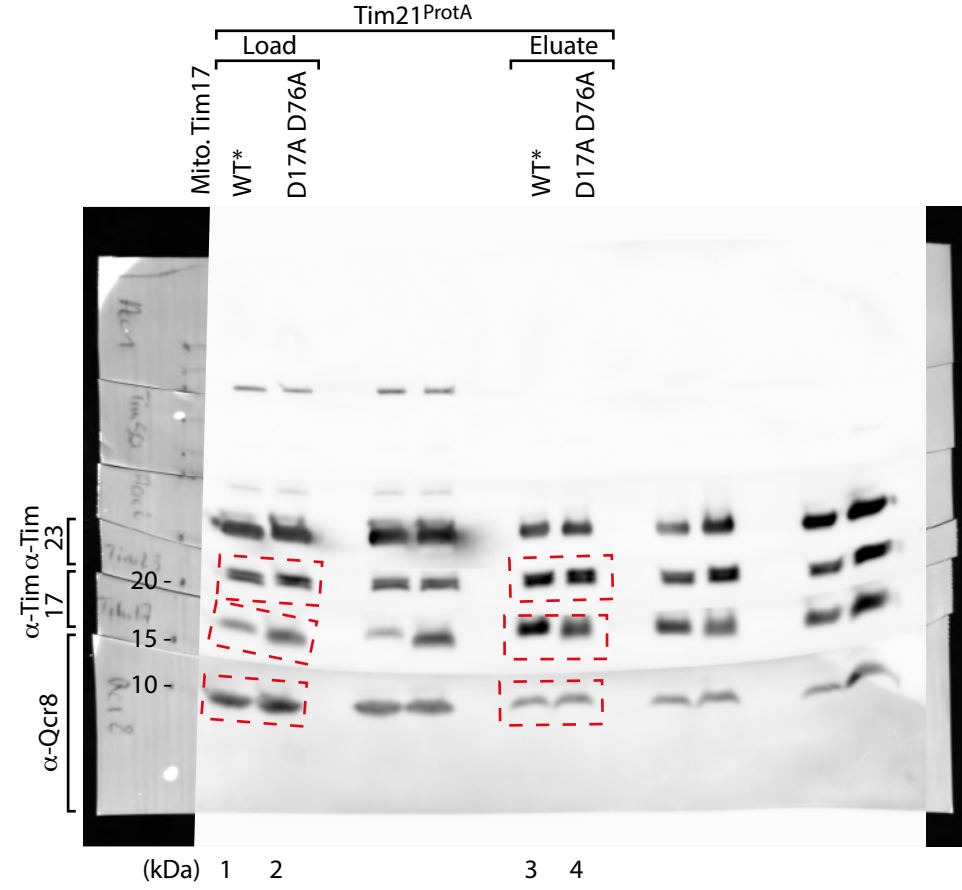

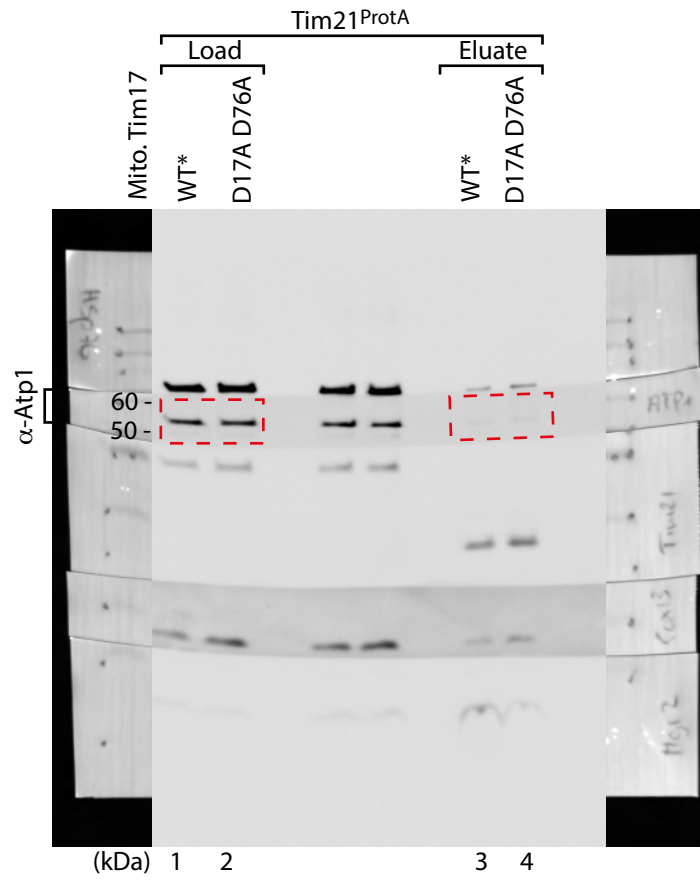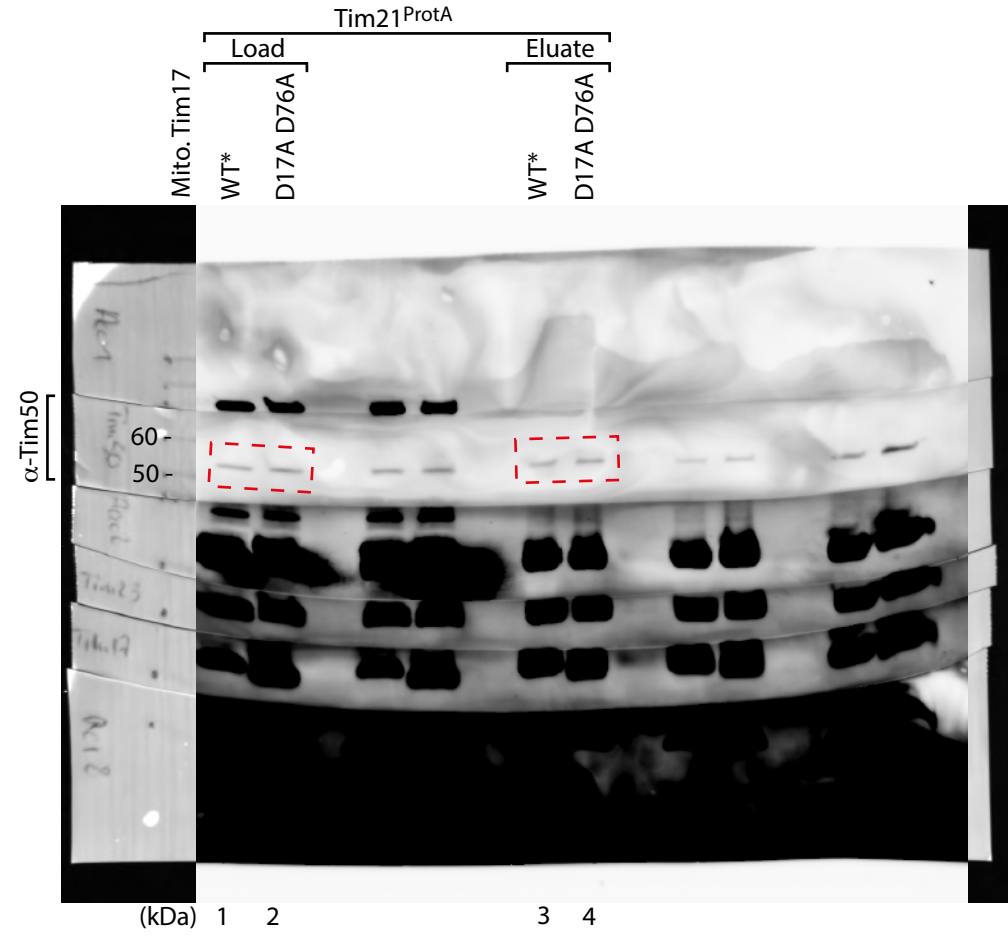



Extended Data Figure 7f cont.

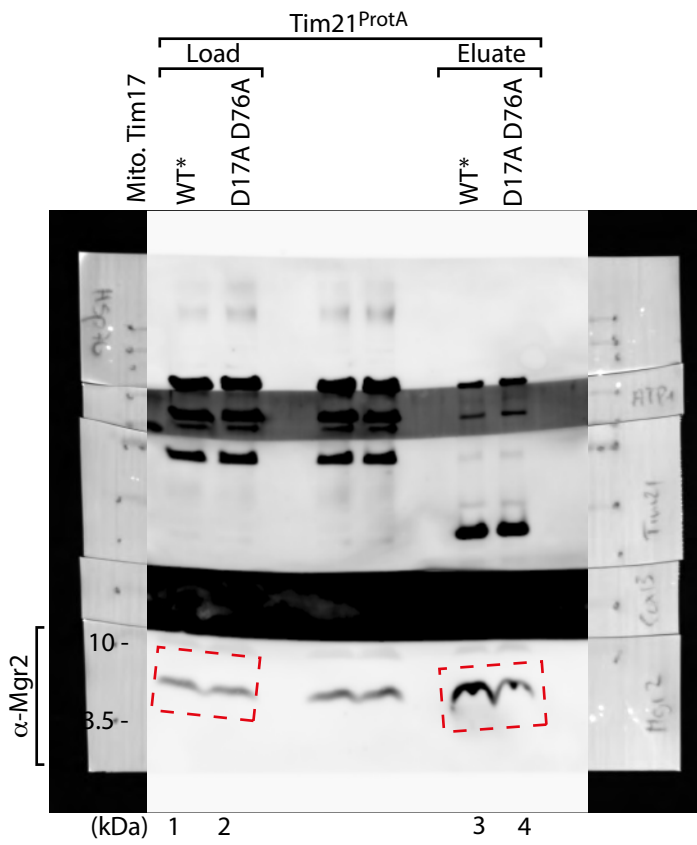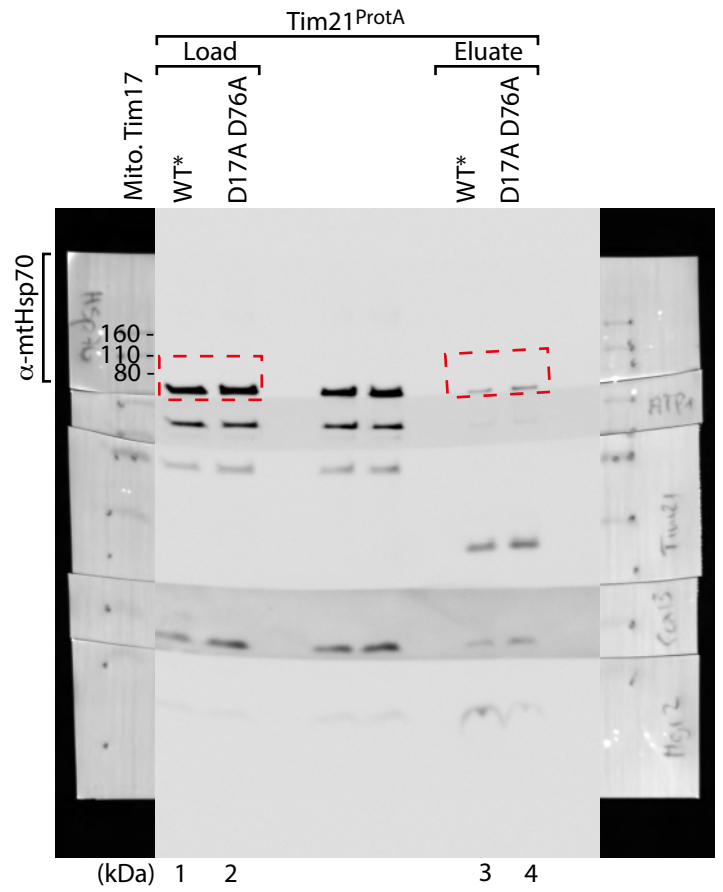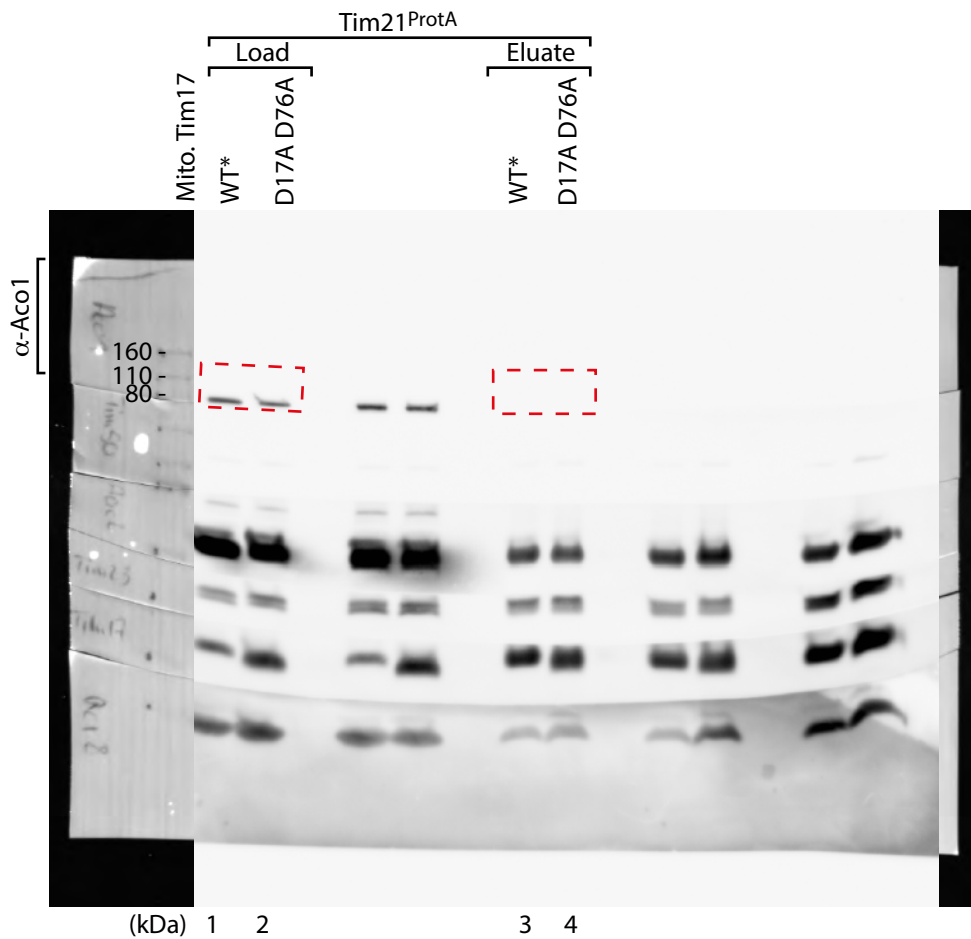

Extended Data Figure 7h

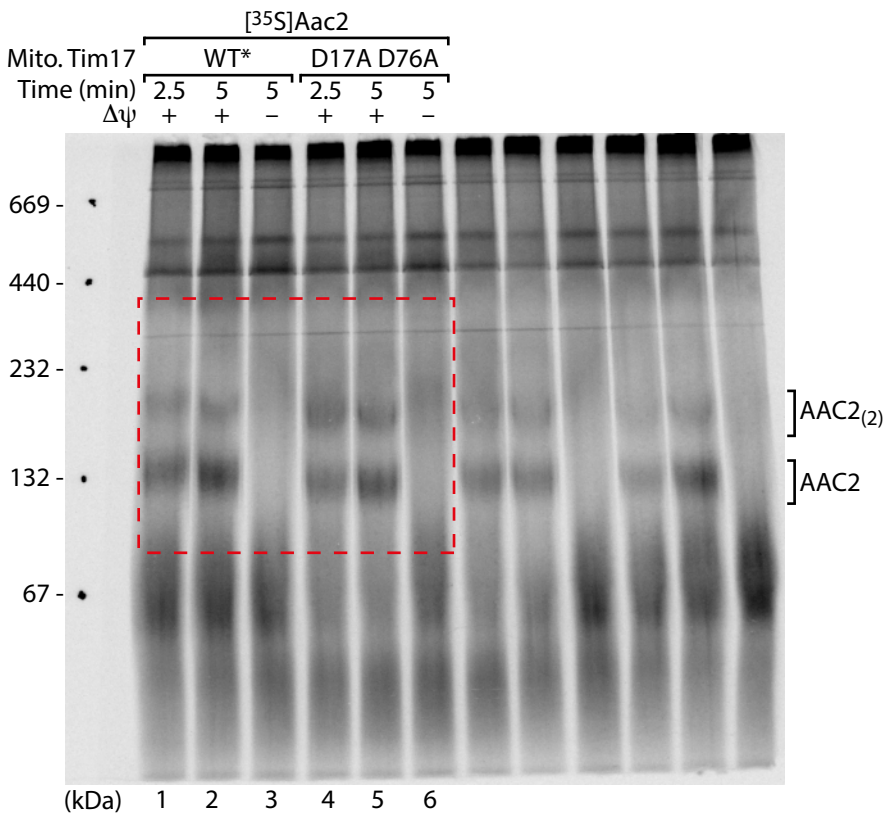

Extended Data Figure 7i

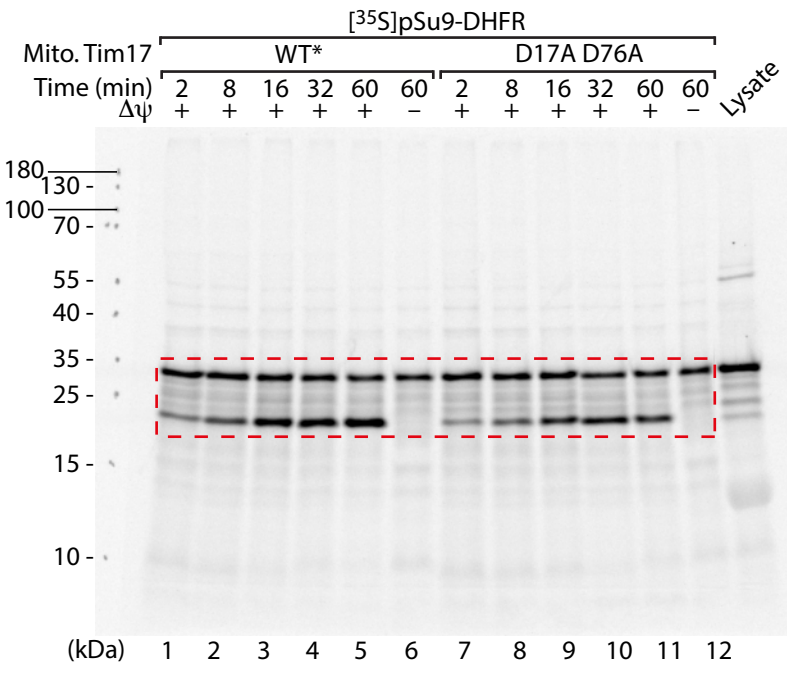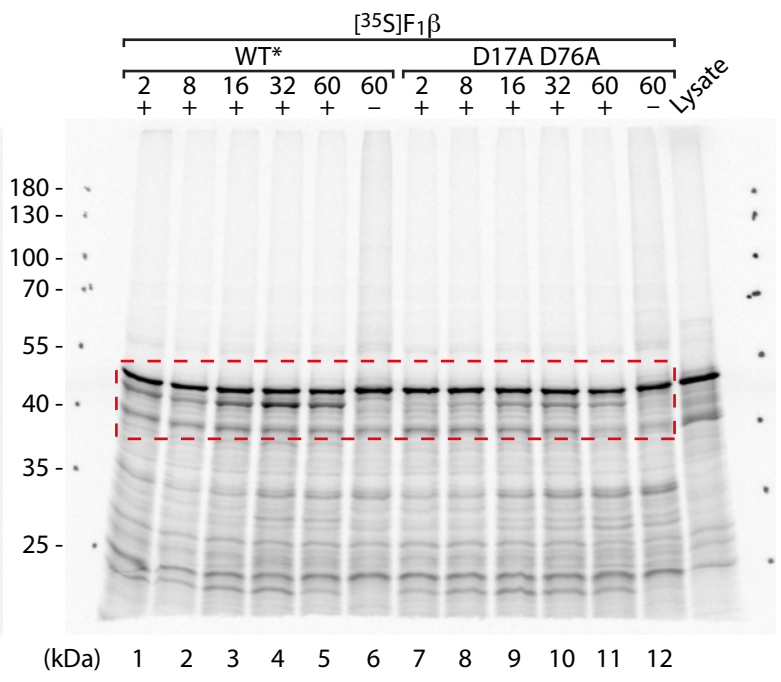

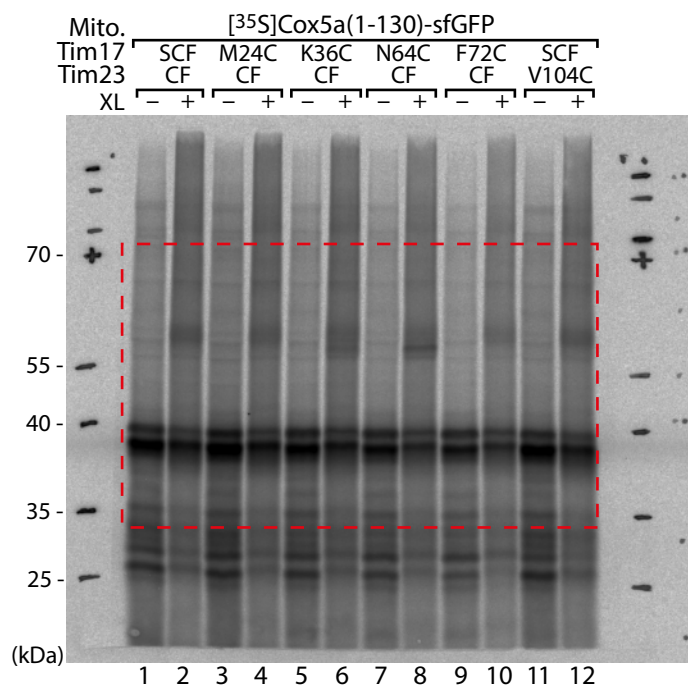

Extended data Figure 8c

left panel

[<sup>35</sup>S]-b<sub>2</sub>(84)<sub>+7</sub>-DHFR + MTX

|             |           |              |              |  |  |
|-------------|-----------|--------------|--------------|--|--|
| Mito. Tim17 | SCF       | SCF          | SCF          |  |  |
| Tim23       | <u>CF</u> | <u>I111C</u> | <u>S115C</u> |  |  |
| XL          | - +       | - +          | - +          |  |  |

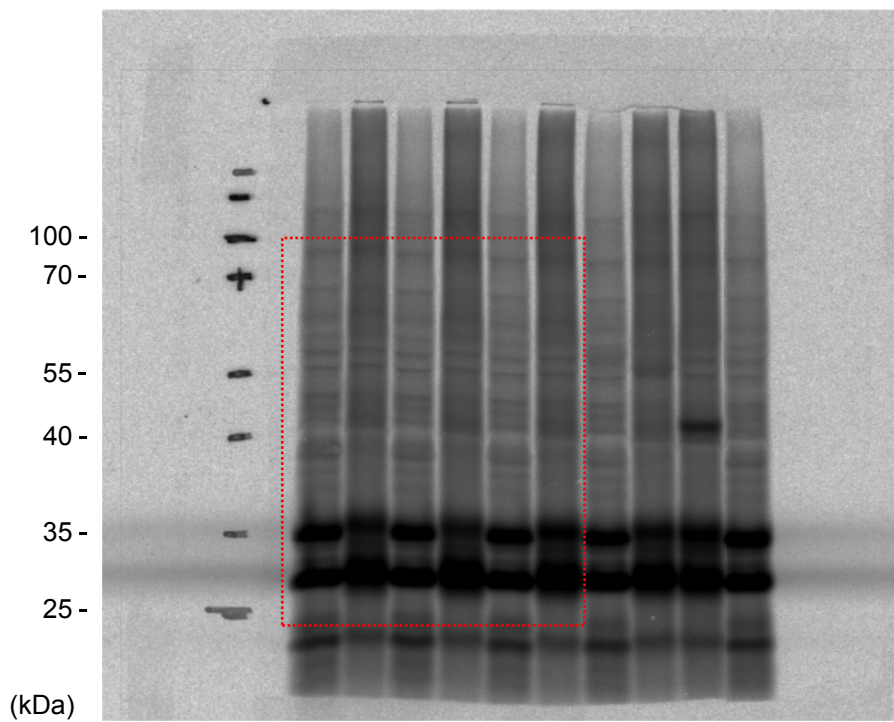

right panel

[<sup>35</sup>S]-b<sub>2</sub>(84)<sub>+7</sub>-DHFR + MTX

|             |              |              |             |           |  |
|-------------|--------------|--------------|-------------|-----------|--|
| Mito. Tim17 | SCF          | SCF          | SCF         | N64C      |  |
| Tim23       | <u>G100C</u> | <u>N163C</u> | <u>C213</u> | <u>CF</u> |  |
| XL          | - +          | - +          | - +         | + -       |  |

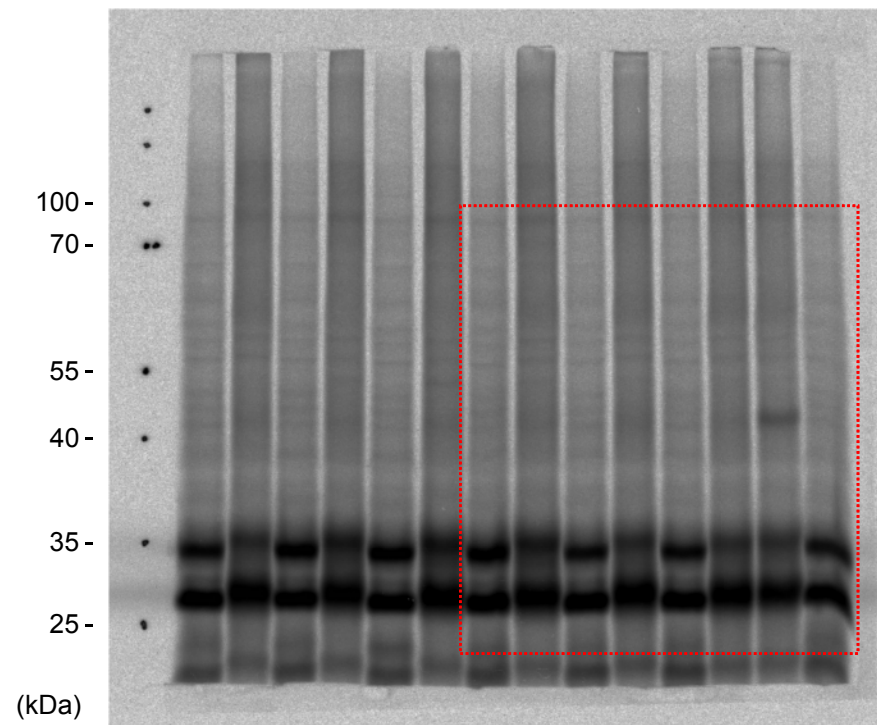

Extended data Figure 8d

$[^{35}\text{S}]\text{-}b_2(110)_{\Delta 19}\text{-DHFR}^\# + \text{MTX}$

| Mito. Tim17 | SCF | SCF   | SCF   | SCF   | SCF   | SCF  | N64C |   |
|-------------|-----|-------|-------|-------|-------|------|------|---|
| Tim23       | CF  | G100C | I111C | S115C | N163C | C213 | CF   |   |
| MBS         | -   | +     | -     | +     | -     | +    | -    | + |

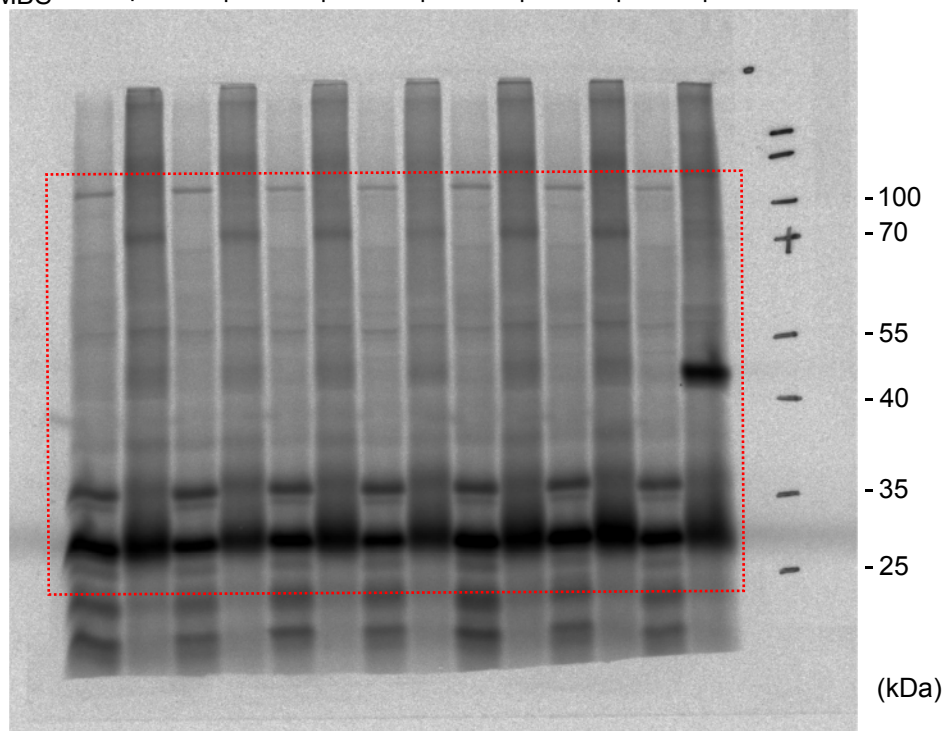

Extended data Figure 8e

$[^{35}\text{S}]\text{-Cox5a}(1\text{-}130)\text{-sfGFP}$

| Mito. Tim17 | SCF | SCF   | SCF   | SCF   | SCF   | SCF  | N64C |   |
|-------------|-----|-------|-------|-------|-------|------|------|---|
| Tim23       | CF  | G100C | I111C | S115C | N163C | C213 | CF   |   |
| XL          | -   | +     | -     | +     | -     | +    | -    | + |

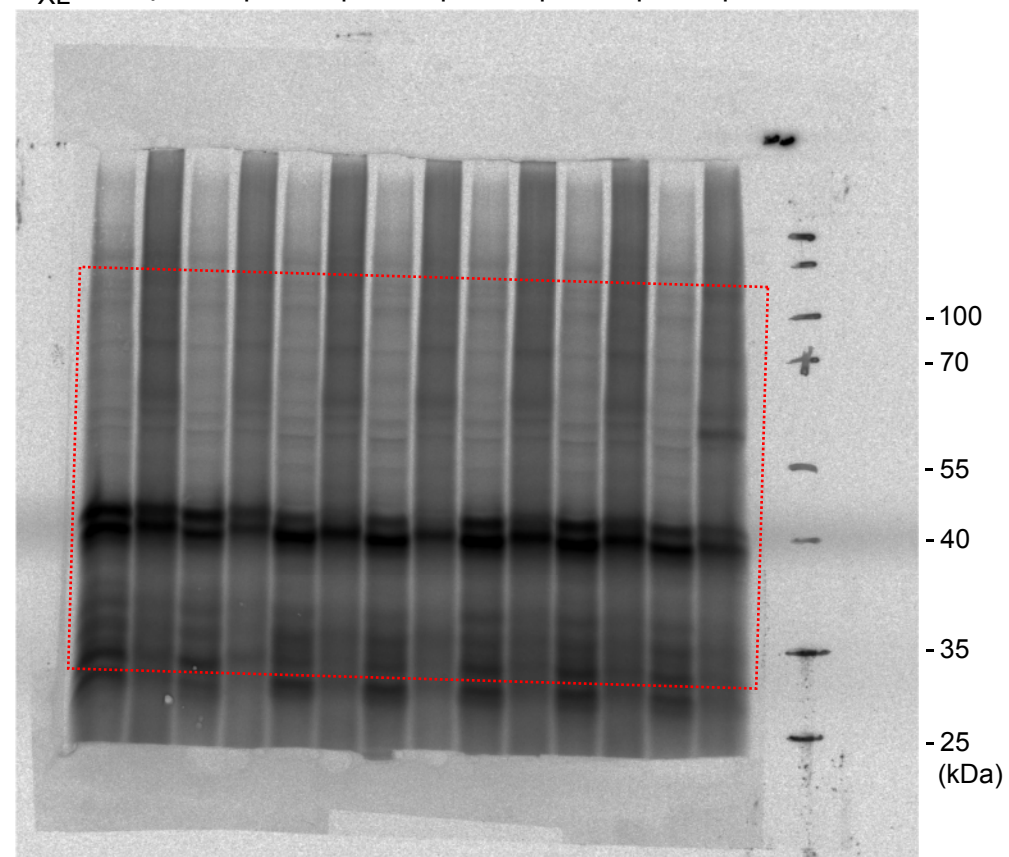



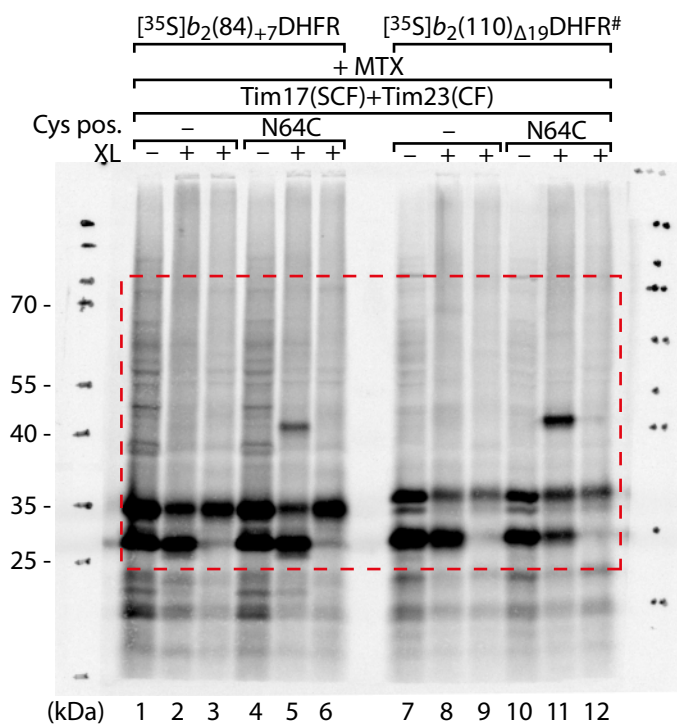

Extended Data Figure 8g

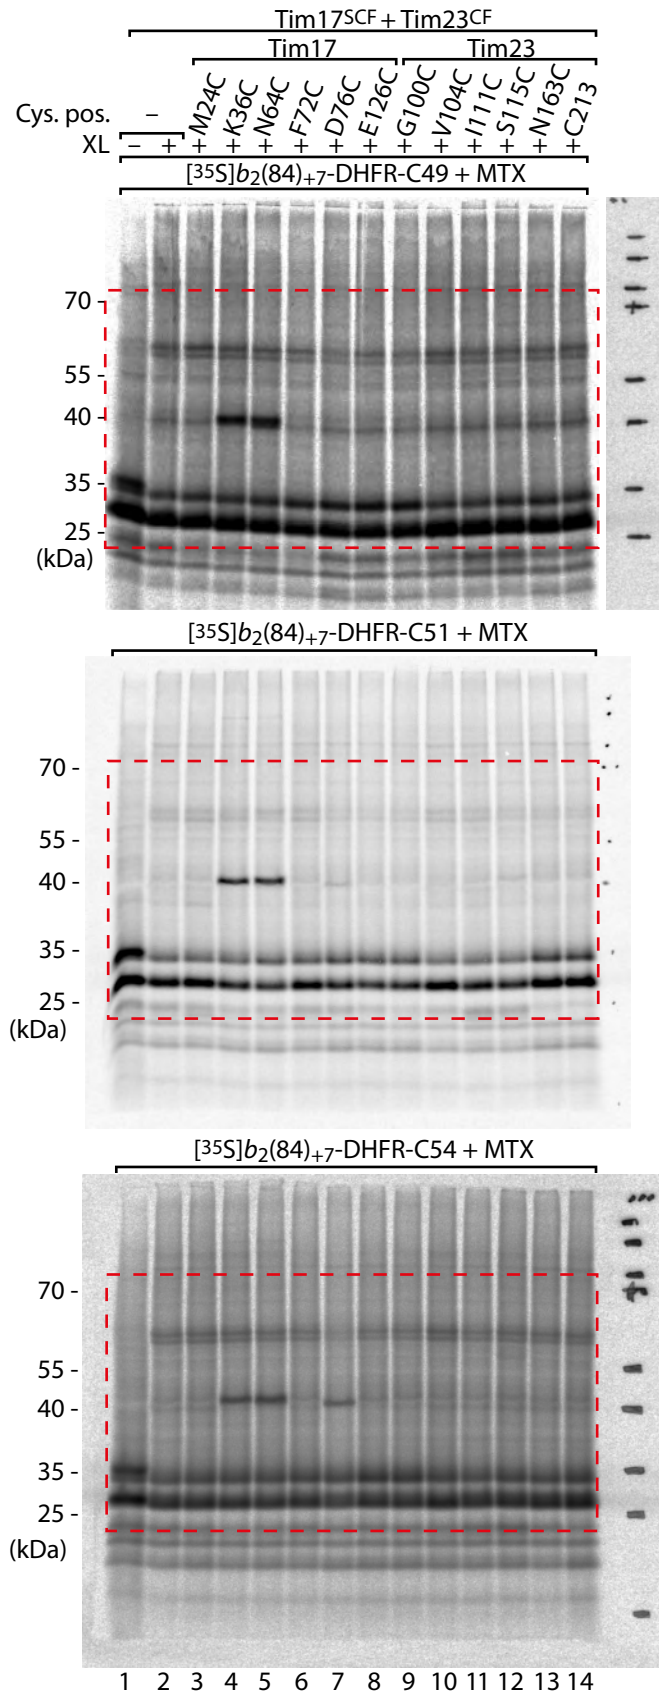

Extended Data Figure 8h

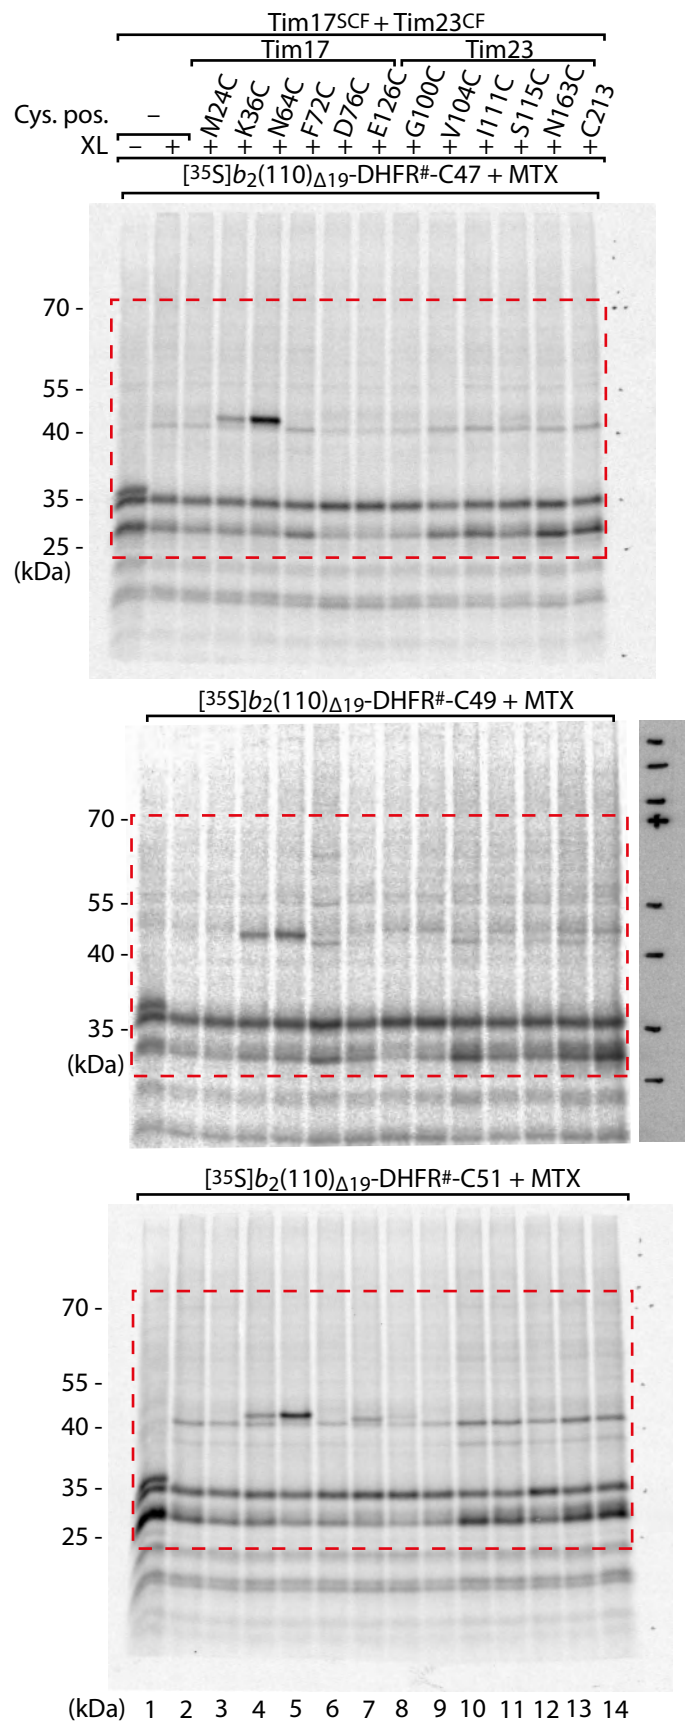

**Supplementary Table 1. Yeast strains used in this study**

| Strain name                                                                                                                                         | Source             | Identifier |
|-----------------------------------------------------------------------------------------------------------------------------------------------------|--------------------|------------|
| YPH499 <i>MATa ura3-52 lys2-801_amber ade2-101_ochre trp-Δ63 his3-Δ200 leu2-Δ1</i>                                                                  | LGC Standards/ATCC | 1501       |
| YPH499 <i>tim17::ade2</i> [pYE <sub>p352</sub> -MET25pr- <i>TIM17</i> -CYC1t]                                                                       | Ref. 21            | -          |
| YPH499 <i>tim23::ade2</i> [pYE <sub>p352</sub> -MET25pr- <i>TIM23</i> -CYC1t]                                                                       | This study         | -          |
| YPH499 <i>tom22::his3</i> [pYE <sub>p352</sub> -MET25pr- <i>TOM22</i> -CYC1t]                                                                       | Ref. 56            | 2281       |
| YPH499 <i>tim17::hphNT1 tim23::ade2</i> [pYE <sub>p352</sub> -MET25pr- <i>TIM23</i> -CYC1t, pYE <sub>p352</sub> (HIS)-MET25pr- <i>TIM17</i> -CYC1t] | This study         | -          |
| YPH499 <i>tom22::his3 KanMX6GAL1-TIM17</i> [pYE <sub>p352</sub> -MET25pr- <i>TOM22</i> -CYC1t]                                                      | This study         | -          |
| YPH499 <i>tim17::ade2</i> [pFL39-Tim17 <sub>D17A</sub> ]                                                                                            | This study         | -          |
| YPH499 <i>tim17::ade2</i> [pFL39-Tim17 <sub>D17S</sub> ]                                                                                            | This study         | -          |
| YPH499 <i>tim17::ade2</i> [pFL39-Tim17 <sub>D17L</sub> ]                                                                                            | This study         | -          |
| YPH499 <i>tim17::ade2</i> [pFL39-Tim17 <sub>D17N</sub> ]                                                                                            | This study         | -          |
| YPH499 <i>tim17::ade2</i> [pFL39-Tim17 <sub>D17T</sub> ]                                                                                            | This study         | -          |
| YPH499 <i>tim17::ade2</i> [pFL39-Tim17 <sub>D17F</sub> ]                                                                                            | This study         | -          |
| YPH499 <i>tim17::ade2</i> [pFL39-Tim17 <sub>D17R</sub> ]                                                                                            | This study         | -          |
| YPH499 <i>tim17::ade2</i> [pFL39-Tim17 <sub>D76A</sub> ]                                                                                            | This study         | -          |
| YPH499 <i>tim17::ade2</i> [pFL39-Tim17 <sub>D76S</sub> ]                                                                                            | This study         | -          |
| YPH499 <i>tim17::ade2</i> [pFL39-Tim17 <sub>D76T</sub> ]                                                                                            | This study         | -          |
| YPH499 <i>tim17::ade2</i> [pFL39-Tim17 <sub>D76L</sub> ]                                                                                            | This study         | -          |
| YPH499 <i>tim17::ade2</i> [pFL39-Tim17 <sub>D76F</sub> ]                                                                                            | This study         | -          |
| YPH499 <i>tim17::ade2</i> [pFL39-Tim17 <sub>D76N</sub> ]                                                                                            | This study         | -          |
| YPH499 <i>tim17::ade2</i> [pFL39-Tim17 <sub>D76R</sub> ]                                                                                            | This study         | -          |
| YPH499 <i>tim17::ade2</i> [pFL39-Tim17 <sub>E126A</sub> ]                                                                                           | This study         | -          |
| YPH499 <i>tim17::ade2</i> [pFL39-Tim17 <sub>E126Q</sub> ]                                                                                           | This study         | -          |
| YPH499 <i>tim17::ade2</i> [pFL39-Tim17 <sub>E126F</sub> ]                                                                                           | This study         | -          |
| YPH499 <i>tim17::ade2</i> [pFL39-Tim17 <sub>E126R</sub> ]                                                                                           | This study         | -          |
| YPH499 <i>tim17::ade2</i> [pFL39-Tim17 <sub>D17A_D76A</sub> ]                                                                                       | This study         | -          |
| YPH499 <i>tim17::ade2</i> [pFL39-Tim17 <sub>D17A_E126A</sub> ]                                                                                      | This study         | -          |
| YPH499 <i>tim17::ade2</i> [pFL39-Tim17 <sub>D76A_E126A</sub> ]                                                                                      | This study         | -          |
| YPH499 <i>tim17::ade2</i> [pFL39-Tim17 <sub>N64L_S73L_T74L</sub> ]                                                                                  | This study         | -          |
| YPH499 <i>tom22::his3</i> [pFL39-Tom22-Tim17]                                                                                                       | This study         | -          |
| YPH499 <i>tom22::his3</i> [pFL39-Tom22-Tim17 <sub>Linker-2xStrep</sub> ]                                                                            | This study         | -          |
| YPH499 <i>tom22::his3</i> [pFL39-Tom22-HisSUMO*Tim23]                                                                                               | This study         | -          |
| YPH499 <i>tom22::his3 KanMX6GAL1-TIM17</i> [pFL39-Tom22]                                                                                            | This study         | -          |
| YPH499 <i>tom22::his3 KanMX6GAL1-TIM17</i> [pFL39-Tom22-Tim17 <sub>WT</sub> ]                                                                       | This study         | -          |
| YPH499 <i>tom22::his3 KanMX6GAL1-TIM17</i> [pFL39-Tom22-Tim17 <sub>D17A_D76A</sub> ]                                                                | This study         | -          |
| YPH499 <i>tom22::his3 KanMX6GAL1-TIM17</i> [pFL39-Tom22-Tim17 <sub>D17A_E126A</sub> ]                                                               | This study         | -          |
| YPH499 <i>tom22::his3 KanMX6GAL1-TIM17</i> [pFL39-Tom22-Tim17 <sub>D76A_E126A</sub> ]                                                               | This study         | -          |
| YPH499 <i>tom22::his3 KanMX6GAL1-TIM17</i> [pFL39-Tom22-Tim17 <sub>D17A_D76A_E126A</sub> ]                                                          | This study         | -          |
| YPH499 <i>tom22::his3 KanMX6GAL1-TIM17 tim21::Tim21<sub>ProteinA-TEV-7His</sub>NatNT2</i> [pFL39-Tom22]                                             | This study         | -          |
| YPH499 <i>tom22::his3 KanMX6GAL1-TIM17 tim21::Tim21<sub>ProteinA-TEV-7His</sub>NatNT2</i> [pFL39-Tom22-Tim17 <sub>D17A_D76A</sub> ]                 | This study         | -          |
| YPH499 <i>tom22::his3 KanMX6GAL1-TIM17</i> [pFL39-Tom22-Tim17 <sub>D17A_D76A</sub> ]                                                                | This study         | -          |
| YPH499 <i>tim23::ade2 tim17::hphNT1</i> [pFL39-HisSUMO*Tim23-Tim17 <sub>2xStrep</sub> ]                                                             | This study         | -          |
| YPH499 <i>tim23::ade2 tim17::hphNT1</i> [pFL39-Tim23 <sub>CF</sub> -Tim17 <sub>SCF</sub> ]                                                          | This study         | -          |
| YPH499 <i>tim23::ade2 tim17::hphNT1</i> [pFL39-Tim23 <sub>CF</sub> -Tim17 <sub>D17C</sub> ]                                                         | This study         | -          |
| YPH499 <i>tim23::ade2 tim17::hphNT1</i> [pFL39-Tim23 <sub>CF</sub> -Tim17 <sub>M24C</sub> ]                                                         | This study         | -          |



|                                                                                                    |            |   |
|----------------------------------------------------------------------------------------------------|------------|---|
| YPH499 <i>tim23::ade2 tim17::hphNT1</i> [pFL39-Tim23 <sub>CF</sub> -Tim17 <sub>K36C</sub> ]        | This study | - |
| YPH499 <i>tim23::ade2 tim17::hphNT1</i> [pFL39-Tim23 <sub>CF</sub> -Tim17 <sub>N64C</sub> ]        | This study | - |
| YPH499 <i>tim23::ade2 tim17::hphNT1</i> [pFL39-Tim23 <sub>CF</sub> -Tim17 <sub>F72C</sub> ]        | This study | - |
| YPH499 <i>tim23::ade2 tim17::hphNT1</i> [pFL39-Tim23 <sub>CF</sub> -Tim17 <sub>D76C</sub> ]        | This study | - |
| YPH499 <i>tim23::ade2 tim17::hphNT1</i> [pFL39-Tim23 <sub>CF</sub> -Tim17 <sub>E126C</sub> ]       | This study | - |
| YPH499 <i>tim23::ade2 tim17::hphNT1</i> [pFL39-Tim23 <sub>G100C</sub> -Tim17 <sub>SCF</sub> ]      | This study | - |
| YPH499 <i>tim23::ade2 tim17::hphNT1</i> [pFL39-Tim23 <sub>V104C</sub> -Tim17 <sub>SCF</sub> ]      | This study | - |
| YPH499 <i>tim23::ade2 tim17::hphNT1</i> [pFL39-Tim23 <sub>H111C</sub> -Tim17 <sub>SCF</sub> ]      | This study | - |
| YPH499 <i>tim23::ade2 tim17::hphNT1</i> [pFL39-Tim23 <sub>S115C</sub> -Tim17 <sub>SCF</sub> ]      | This study | - |
| YPH499 <i>tim23::ade2 tim17::hphNT1</i> [pFL39-Tim23 <sub>N163C</sub> -Tim17 <sub>SCF</sub> ]      | This study | - |
| YPH499 <i>tim23::ade2 tim17::hphNT1</i> [pFL39-Tim23 <sub>C213</sub> -Tim17 <sub>SCF</sub> ]       | This study | - |
| YPH499 <i>tim23::ade2 tim17::hphNT1</i> [pFL39-Tim23 <sub>WT</sub> -Tim17 <sub>SCF_N16C</sub> ]    | This study | - |
| YPH499 <i>tim23::ade2 tim17::hphNT1</i> [pFL39-Tim23 <sub>I154C</sub> -Tim17 <sub>SCF_F22C</sub> ] | This study | - |
| YPH499 <i>tim23::ade2 tim17::hphNT1</i> [pFL39-Tim23 <sub>L109C</sub> -Tim17 <sub>SCF_V67C</sub> ] | This study | - |

**Supplementary Table 2. Plasmids used in this study**

| Plasmid                                                          | Source        | Identifier |
|------------------------------------------------------------------|---------------|------------|
| pGEM4Z- <i>b</i> <sub>2</sub> (84)-DHFR                          | Ref. 48       | B27        |
| pGEM4Z- <i>b</i> <sub>2</sub> (84)-DHFR_R47C                     | This study    | -          |
| pGEM4Z- <i>b</i> <sub>2</sub> (84)-DHFR_K48C                     | This study    | -          |
| pGEM4Z- <i>b</i> <sub>2</sub> (84)-DHFR_R49C                     | This study    | -          |
| pGEM4Z- <i>b</i> <sub>2</sub> (84)-DHFR_T50C                     | This study    | -          |
| pGEM4Z- <i>b</i> <sub>2</sub> (84)-DHFR_Q51C                     | This study    | -          |
| pGEM4Z- <i>b</i> <sub>2</sub> (84)-DHFR_S52C                     | This study    | -          |
| pGEM4Z- <i>b</i> <sub>2</sub> (84)-DHFR_W53C                     | This study    | -          |
| pGEM4Z- <i>b</i> <sub>2</sub> (84)-DHFR_T54C                     | This study    | -          |
| pGEM4Z- <i>b</i> <sub>2</sub> (110) <sub>Δ</sub> -DHFR           | Ref. 14       | 2336       |
| pGEM4Z- <i>b</i> <sub>2</sub> (110) <sub>Δ</sub> -DHFR_C86S      | This study    | -          |
| pGEM4Z- <i>b</i> <sub>2</sub> (110) <sub>Δ</sub> -DHFR_S47C_C86S | This study    | -          |
| pGEM4Z- <i>b</i> <sub>2</sub> (110) <sub>Δ</sub> -DHFR_S48C_C86S | This study    | -          |
| pGEM4Z- <i>b</i> <sub>2</sub> (110) <sub>Δ</sub> -DHFR_V49C_C86S | This study    | -          |
| pGEM4Z- <i>b</i> <sub>2</sub> (110) <sub>Δ</sub> -DHFR_A50C_C86S | This study    | -          |
| pGEM4Z- <i>b</i> <sub>2</sub> (110) <sub>Δ</sub> -DHFR_Y51C_C86S | This study    | -          |
| pGEM4Z- <i>b</i> <sub>2</sub> (110) <sub>Δ</sub> -DHFR_L52C_C86S | This study    | -          |
| pGEM4Z- <i>b</i> <sub>2</sub> (110) <sub>Δ</sub> -DHFR_N53C_C86S | This study    | -          |
| pGEM4Z- <i>b</i> <sub>2</sub> (110) <sub>Δ</sub> -DHFR_W54C_C86S | This study    | -          |
| pGEM4Z- <i>b</i> <sub>2</sub> (167) <sub>Δ</sub> -DHFR           | Ref. 48, 59   | B04        |
| pGEM4Z- <i>b</i> <sub>2</sub> (167)-DHFR                         | Ref. 63       | B03        |
| pGEM4Z-F <sub>1</sub> β                                          | Wiedemann lab | F01        |
| pGEM4Z-pSu9(1-69)-DHFR                                           | Wiedemann lab | S02        |
| pGEM4Z- <i>b</i> <sub>2</sub> (220) <sub>Δ</sub> -DHFR           | Wiedemann lab | B18        |
| pGEM4Z- <i>b</i> <sub>2</sub> (220)-DHFR                         | Ref. 14       | B46        |
| pGEM4Z-Cytochrome <i>c</i> <sub>1</sub>                          | Wiedemann lab | C03        |
| pGEM4Z-Aac2                                                      | Wiedemann lab | 1039       |
| pFL39-Tim17                                                      | Ref. 21       | -          |
| pFL39-Tom22                                                      | Ref. 56       | 1409       |
| pFL39-Tom22-Tim17                                                | This study    | -          |
| pFL39-Tim17 <sub>D17A</sub>                                      | This study    | -          |
| pFL39-Tim17 <sub>D17S</sub>                                      | This study    | -          |
| pFL39-Tim17 <sub>D17L</sub>                                      | This study    | -          |
| pFL39-Tim17 <sub>D17N</sub>                                      | This study    | -          |
| pFL39-Tim17 <sub>D17T</sub>                                      | This study    | -          |
| pFL39-Tim17 <sub>D17F</sub>                                      | This study    | -          |
| pFL39-Tim17 <sub>D17R</sub>                                      | This study    | -          |
| pFL39-Tim17 <sub>D76A</sub>                                      | This study    | -          |
| pFL39-Tim17 <sub>D76S</sub>                                      | This study    | -          |
| pFL39-Tim17 <sub>D76T</sub>                                      | This study    | -          |

|                                                                            |            |   |
|----------------------------------------------------------------------------|------------|---|
| pFL39-Tim17 <sub>D76L</sub>                                                | This study | - |
| pFL39-Tim17 <sub>D76F</sub>                                                | This study | - |
| pFL39-Tim17 <sub>D76N</sub>                                                | This study | - |
| pFL39-Tim17 <sub>D76R</sub>                                                | This study | - |
| pFL39-Tim17 <sub>E126A</sub>                                               | This study | - |
| pFL39-Tim17 <sub>E126Q</sub>                                               | This study | - |
| pFL39-Tim17 <sub>E126F</sub>                                               | This study | - |
| pFL39-Tim17 <sub>E126R</sub>                                               | This study | - |
| pFL39-Tim17 <sub>D17A_D76A</sub>                                           | This study | - |
| pFL39-Tim17 <sub>D17A_E126A</sub>                                          | This study | - |
| pFL39-Tim17 <sub>D76A_E126A</sub>                                          | This study | - |
| pFL39-Tim17 <sub>D17A_D76A_E126A</sub>                                     | This study | - |
| pFL39-Tim17 <sub>C118G_C120V</sub>                                         | This study | - |
| pFL39-Tim17 <sub>N16C_C118G_C120V</sub>                                    | This study | - |
| pFL39-Tim17 <sub>L121C_C118G_C120V</sub>                                   | This study | - |
| pFL39-Tim17 <sub>V124C_C118G_C120V</sub>                                   | This study | - |
| pFL39-Tim17 <sub>N64L</sub>                                                | This study | - |
| pFL39-Tim17 <sub>S114L</sub>                                               | This study | - |
| pFL39-Tim17 <sub>M24D_G69D_C118E</sub>                                     | This study | - |
| pFL39-Tim17 <sub>D17A_M24D_G69D_D76A_C118E_E126A</sub>                     | This study | - |
| pFL39-Tim17 <sub>G28D_F65D_S114E</sub>                                     | This study | - |
| pFL39-Tim17 <sub>D17A_G28D_F65D_D76A_S114E_E126E</sub>                     | This study | - |
| pFL39-Tim17 <sub>D95A_D96A_D167A</sub>                                     | This study | - |
| pFL39-Tim17 <sub>D95A_D96A_D167A_E221A</sub>                               | This study | - |
| pFL39-Tim17 <sub>D95A_D96A_D167A_G100D_N163D_C213D</sub>                   | This study | - |
| pFL39-Tom22-Tim17 <sub>D17A_D76A</sub>                                     | This study | - |
| pFL39-Tom22-Tim17 <sub>D17A_E126A</sub>                                    | This study | - |
| pFL39-Tom22-Tim17 <sub>D76A_E126A</sub>                                    | This study | - |
| pFL39-Tom22-Tim17 <sub>D17A_D76A_E126A</sub>                               | This study | - |
| pFL39-Tom22-Tim17 <sub>GGGG-A-GGGG(Linker)-2xStrep</sub>                   | This study | - |
| pFL39-Tom22- HisSumo*Tim23                                                 | This study | - |
| pFL39-Tim23-Tim17                                                          | This study | - |
| pFL39- HisSumo*Tim23-Tim17 <sub>Linker-2xStrep</sub>                       | This study | - |
| pFL39-Tim23 <sub>G100D_N163D_C213D</sub> -Tim17 <sub>D17A_D76A_E126A</sub> | This study | - |
| pFL39-Tim23 <sub>CF</sub> -Tim17 <sub>SCF</sub>                            | This study | - |
| pFL39-Tim23 <sub>CF</sub> -Tim17 <sub>SCF_D17C</sub>                       | This study | - |
| pFL39-Tim23 <sub>CF</sub> -Tim17 <sub>SCF_M24C</sub>                       | This study | - |
| pFL39-Tim23 <sub>CF</sub> -Tim17 <sub>SCF_K36C</sub>                       | This study | - |
| pFL39-Tim23 <sub>CF</sub> -Tim17 <sub>SCF_N64C</sub>                       | This study | - |
| pFL39-Tim23 <sub>CF</sub> -Tim17 <sub>SCF_F72C</sub>                       | This study | - |
| pFL39-Tim23 <sub>CF</sub> -Tim17 <sub>SCF_D76C</sub>                       | This study | - |
| pFL39-Tim23 <sub>CF</sub> -Tim17 <sub>SCF_E126C</sub>                      | This study | - |

|                                                            |            |      |
|------------------------------------------------------------|------------|------|
| pFL39-Tim23 <sub>CF_G100C</sub> -Tim17 <sub>SCF</sub>      | This study | -    |
| pFL39-Tim23 <sub>CF_V104C</sub> -Tim17 <sub>SCF</sub>      | This study | -    |
| pFL39-Tim23 <sub>CF_I111C</sub> -Tim17 <sub>SCF</sub>      | This study | -    |
| pFL39-Tim23 <sub>CF_S115C</sub> -Tim17 <sub>SCF</sub>      | This study | -    |
| pFL39-Tim23 <sub>CF_N163C</sub> -Tim17 <sub>SCF</sub>      | This study | -    |
| pFL39-Tim23 <sub>CF_C213</sub> -Tim17 <sub>SCF</sub>       | This study | -    |
| pFL39-Tim23 <sub>WT</sub> -Tim17 <sub>SCF_N16C</sub>       | This study | -    |
| pFL39-Tim23 <sub>CF_I154C</sub> -Tim17 <sub>SCF_F22C</sub> | This study | -    |
| pFL39-Tim23 <sub>CF_L109C</sub> -Tim17 <sub>SCF_V67C</sub> | This study | -    |
| pSUMO-His <sub>14</sub> -SUMO-Jac1-sfGFP                   | Ref. 20    | -    |
| pSUMO-His <sub>14</sub> -SUMO-Cox5a(1-130)-sfGFP           | This study | -    |
| pFA6a-hphNT1                                               | Ref. 64    |      |
| pFA6a-kanMX6-PGAL1                                         | Ref. 57    | 1437 |
| pFA6a-NatNT1-Protein A-TEV-7xHis                           | This study | 2724 |

**Supplementary Table 3. Primers used in this study**

| Primer name      | Sequence 5' → 3'                                                 |
|------------------|------------------------------------------------------------------|
| SP6 Tim17 fw     | GATCGATTTAGGTGACACTATAGAAGCGGCCACCATGTCAGCCGATCA<br>TTCGAGAGATCC |
| Tim17 rev TAA    | CGTACGGATCCTTAAGCTTGCAGAGGTTGAGAGG                               |
| SP6-Oxa1         | TCGATTTAGGTGACACTATAGAATACGCCGCCCATGTTCAAACCTCAC<br>CTCTCGAC     |
| Oxa1 rev         | GATCTCATTTTTTTGTTATTAATGAAGTTTG                                  |
| WT DIC_SP6_Fwd   | TCGATTTAGGTGACACTATAGAATACGCCGCCCATGTCAACCAACG<br>CAAAAGAG       |
| DIC WT_Rev       | CTACTTGTCTTCCTTTGGCATG                                           |
| SP6-Cox5a_Fwd    | TCGATTTAGGTGACACTATAGAATACGCCGCCCATGTTACGTA                      |
| sfGFP_Rev        | TTATTTATACAGCTCGTCCATGCC                                         |
| EcoRI_Tom22p_Fwd | CAGTCGAATTCGGCTGAAGATATCTATAG                                    |
| EcoRI_Tom22t_Rev | GACTGGAATTCCGCATCGGAAGTTCATAGAAG                                 |
| EcoRI_Tim17p_Fwd | CAGTCGAATTCGGATGAAAACGGCAG                                       |
| EcoRI_Tim17t_Rev | GACTGGAATTCAAGGAAGGAGAATACATCTGGC                                |
| EcoRI_Tim23p_Fwd | CAGTCGAATTCGAAGTATAAGTGTCATG                                     |
| EcoRI_Tim23t_Rev | GACTGGAATTCCTTTAATTGGCCATCGAAAACAATAG                            |
| Tim17_D17A_fw    | CATACTAAATGCGTTCGGTGGTGCTTTTG                                    |
| Tim17_D17A_rev   | CACCACCGAACGCATTTAGTATGACTATAG                                   |
| Tim17_D76A_fw    | GACTTTTGCGTGCGCTGTGAAGGCCGTTAG                                   |
| Tim17_D76A_rev   | CACAGCGCACGAAAAGTCGAAAATAAAC                                     |
| Tim17_E126A_fw   | GTGTGATTGCAGGTGTGGGACTAATG                                       |
| Tim17_E126A_rev  | CCACACCTGCAATCACACCCAAC                                          |
| Tim17_D17R_fwd   | CATACTAAATAGATTCGGTGGTGCTTTTG                                    |
| Tim17_D17R_rev   | CCACCGAATCTATTTAGTATGACTATAG                                     |
| Tim17_D17N_fwd   | CATACTAAATAATTTTCGGTGGTGCTTTTG                                   |
| Tim17_D17N_rev   | CACCGAAATTATTTAGTATGACTATAG                                      |
| Tim17_D17F_fwd   | CATACTAAATTTTTTCGGTGGTGCTTTTG                                    |
| Tim17_D17F_rev   | CCACCGAAAAAATTTAGTATGACTATAG                                     |
| Tim17_D76R_fwd   | CGACTTTTAGATGCGCTGTGAAGG                                         |
| Tim17_D76R_rev   | CACAGCGCATCTAAAAGTCGAAAATAAAC                                    |
| Tim17_D76N_fwd   | CGACTTTTAATTGCGCTGTGAAG                                          |
| Tim17_D76N_rev   | CAGCGCAATTAAGTCGAAAATAAAC                                        |
| Tim17_D76F_fwd   | CGACTTTTTTTTTGCGCTGTGAAG                                         |
| Tim17_D76F_rev   | CAGCGCAAAAAAAGTCGAAAATAAAC                                       |
| Tim17_E126R_fwd  | GTGTGATTAGAGGTGTGGGACTAATG                                       |
| Tim17_E126R_rev  | CCACACCTCTAATCACACCCAAC                                          |
| Tim17_E126Q_fwd  | GTGTGATTCAAGGTGTGGGACTAATG                                       |
| Tim17_E126Q_rev  | CACACCTTGAATCACACCCAAC                                           |



|                                 |                                                                                 |
|---------------------------------|---------------------------------------------------------------------------------|
| Tim17_E126F_fwd                 | GTGTGATTTTTGGTGTGGGACTAATG                                                      |
| Tim17_E126F_rev                 | CCCACACCAAAAATCACACCCAAC                                                        |
| Tim17_D17T_fwd                  | CATACTAAATACTTTCGGTGGTGCTTTTG                                                   |
| Tim17_D17T_rev                  | CCACCGAAAGTATTTAGTATGACTATAGG                                                   |
| Tim17_D17S_fwd                  | CATACTAAATTCTTTCGGTGGTGCTTTTG                                                   |
| Tim17_D17S_rev                  | CCACCGAAAGAATTTAGTATGACTATAG                                                    |
| Tim17_D17L_fwd                  | CATACTAAATTTGTTCGGTGGTGCTTTTG                                                   |
| Tim17_D17L_rev                  | CCACCGAACAAATTTAGTATGACTATAGG                                                   |
| Tim17_D76T_fwd                  | CGACTTTTACTTGCGCTGTGAAG                                                         |
| Tim17_D76T_rev                  | CAGCGCAAGTAAAAGTCGAAAATAAAC                                                     |
| Tim17_D76S_fwd                  | CGACTTTTTCTTGCGCTGTGAAG                                                         |
| Tim17_D76S_rev                  | CAGCGCAAGAAAAAGTCGAAAATAAAC                                                     |
| Tim17_D76L_fwd                  | CGACTTTTTTGTGCGCTGTGAAGG                                                        |
| Tim17_D76L_rev                  | CACAGCGCACAAAAAAGTCGAAAATAAAC                                                   |
| Tim17_C118G_C120V<br>_fwd       | CTGTTTTGTTGGGTGTGATTGAAGGTGTG                                                   |
| Tim17_C118G_C120V<br>_rev       | CACCCGTGATCGAACTGTTCCCTTGTATG                                                   |
| Tim17_N16C_fwd                  | GTCATACTATGTGATTTTCGGTGGTG                                                      |
| Tim17_N16C_rev                  | CCGAAATCACATAGTATGACTATAGG                                                      |
| Tim17_C118G_C120V<br>_L121C_fwd | GTGCTGTTTGTGGGTGTGATTG                                                          |
| Tim17_C118G_C120V<br>_L121C_rev | CACACCCAAACAAACAGCACCCGTG                                                       |
| Tim17_C118G_C120V<br>_V124C_fwd | GTTGGGTTGTATTGAAGGTGTGG                                                         |
| Tim17_C118G_C120V<br>_V124C_rev | CCTTCAATACAACCCAACAAAACAG                                                       |
| Tim17_N64L_fwd                  | CTGGGTGGTTTGTGGTGTGTGGG                                                         |
| Tim17_N64L_rev                  | CACACCAAACAAACCACCCAGTACG                                                       |
| Tim17_S114L_fwd                 | CAAGGAACTTATCGATCACGTGTGCTTG                                                    |
| Tim17_S114L_rev                 | CGTGATCGATAAGTTCCTTGTATGCCTC                                                    |
| pGal-Tim17_F4                   | ACTCCAGCATTATAAAGCATATCTAACAATACCATTCCGGTTATACTGA<br>ATAGCCGAATTCGAGCTCGTTTAAAC |
| pGal-Tim17_R2                   | AAATCATTTAGTATGACTATAGGACATGGATCTCTCGAATGATCGGCTG<br>ACATTTTGAGATCCGGGTTTT      |

|                 |                                 |
|-----------------|---------------------------------|
| Tim17_D17C_fwd  | TGTTTCGGTGGTGCTTTTGCCATG        |
| Tim17_D17C_rev  | ATTTAGTATGACTATAGGACATGGATC     |
| Tim17_M24C_fwd  | TGTGGTGCCATTGGTGGTGTG           |
| Tim17_M24C_rev  | GGCAAAAGCACCACCGAAATC           |
| Tim17_K36C_fwd  | TGTGGTTTTAGAAATTCGCCATTAGGTG    |
| Tim17_K36C_rev  | AATCCCATGCCAAACAACACC           |
| Tim17_N64C_fwd  | TGTTTTGGTGTGTGGGGTGGTTTA        |
| Tim17_N64C_rev  | ACCACCCAGTACGGGAG               |
| Tim17_F72C_fwd  | TGTTTCGACTTTTGATTGCGCTGTG       |
| Tim17_F72C_rev  | TAAACCACCCACACACC               |
| Tim17_D76C_fwd  | TGTTGCGCTGTGAAGGCCG             |
| Tim17_D76C_rev  | AAAAGTCGAAAATAAACACCC           |
| Tim17_E126C_fwd | TGTGGTGTGGGACTAATGTTTCAAAG      |
| Tim17_E126C_rev | AATCACACCCAACAAAACAGCAC         |
| Tim17_F22C_fwd  | TGTGCCATGGGTGCCATTGG            |
| Tim17_F22C_rev  | AGCACCACCGAAATCATTAGTAT         |
| Tim17_V67C_fwd  | TGCTGGGGTGGTTTATTTTCGACTTTTG    |
| Tim17_V67C_rev  | ACCAAAATTACCACCCAGTACG          |
| Tim17_M24D_Fwd  | CTTTTGCCGATGGTGCCATTGGTG        |
| Tim17_M24D_Rev  | CAATGGCACCATCGGCAAAAGCAC        |
| Tim17_G69D_Fwd  | GTGTGTGGGATGGTTTATTTTCGAC       |
| Tim17_G69D_Rev  | GAAAATAAACCATCCCACACACCAAAATTAC |
| Tim17_C118E_Fwd | CGATCACGGAAGCTTGTGTTGTTGG       |
| Tim17_C118E_Rev | CAAACAAGCTTCCGTGATCGAACTG       |
| Tim17_G28D_Fwd  | GTGCCATTGATGGTGTGTTGTTGG        |
| Tim17_G28D_Rev  | CAACACCATCAATGGCACCCATG         |
| Tim17_F65D_Fwd  | GTGGTAATGATGGTGTGTGGGGTG        |
| Tim17_F65D_Rev  | CACACACCATCATTACCACCCAGTAC      |
| Tim17_S114E_Fwd | CAAGGAACGAATCGATCACGTGTG        |
| Tim17_S114E_Rev | GTGATCGATTCGTTTCCTTGTATGC       |
| Tim23_G100C_fwd | TGTACCGGTGCCGTCTACCTG           |
| Tim23_G100C_rev | GTACAATAGGTCATCGGTCCAC          |
| Tim23_V104C_fwd | TGTTACCTGCTGGGACTTGGTATCG       |
| Tim23_V104C_rev | GGCACCGGTACCGTACAATAG           |
| Tim23_I111C_fwd | TGTGGAGGGTTTTCTGGTATGATG        |

|                        |                                                 |
|------------------------|-------------------------------------------------|
| Tim23_I111C_rev        | ACCAAGTCCCAGCAGGTAG                             |
| Tim23_S115C_fwd        | TGTGGTATGATGCAGGGTCTGC                          |
| Tim23_S115C_rev        | AAACCCTCCGATACCAAGTCC                           |
| Tim23_N163C_fwd        | TGTTCTACAATAGATGCACTAAGAGG                      |
| Tim23_N163C_rev        | GATGATATTGTAGCTCAACGCG                          |
| Tim23_A213C_fwd        | TGTAGTGTCAAGAAAAGACTACTTGAAAAATG                |
| Tim23_A213C_rev        | CCAGACGGCAGCCGCAG                               |
| Tim23_I154C_fwd        | TGTCTCGCGTTGAGCTACAATATCATC                     |
| Tim23_I154C_rev        | CCCCGCATTATTACCTAAGAAGG                         |
| Tim23_L109C_fwd        | TGTGGTATCGGAGGGTTTTCTGG                         |
| Tim23_L109C_rev        | TCCCAGCAGGTAGACGGC                              |
| Tim23_D95A<br>D96A_Fwd | GTGGACCGCTGCCCTATGTTACGGTAC                     |
| Tim23_D95A<br>D96A_Rev | GTAACATAGGGCAGCGGTCCACCCACG                     |
| Tim23_D167A_Fwd        | CTACAATAGCTGCACTAAGAGGCAAAC                     |
| Tim23_D167A_Rev        | CTTAGTGCAGCTATTGTAGAATTG                        |
| Tim23_E221A_Fwd        | GACTACTTGCAAAATGAGCAACACAAG                     |
| Tim23_E221A_Rev        | GTTGCTCATTTTGCAAGTAGTCTTTTC                     |
| Tim23_G100D_Fwd        | CTATGTTACGATACCGGTGCCGTC                        |
| Tim23_G100D_Rev        | CACCGGTATCGTAACATAGGTCATC                       |
| Tim23_N163D_Fwd        | CAATATCATCGATTCTACAATAGATG                      |
| Tim23_N163D_Rev        | GTAGAATCGATGATATTGTAGCTC                        |
| Tim23_C213D_Fwd        | GCCGCTGGGATAGTGTCAAGAAAAGAC                     |
| Tim23_C213D_Rev        | CTTGACACTATCCCAGACGGCGCAC                       |
| b2-110d19-C86S for     | ATATTGATCACAACCCAATATCATCGGGCTTGTTATGC          |
| b2-110d19-C86S rev     | GCATAACAAGCCCGATGATAGTTGGGTTGTGATCAATAT         |
| b2-84-R47C for         | GTCGTTCGAACAAGACTCATGCAAACGCACACAGTCATGGA       |
| b2-84-R47C rev         | TCCATGACTGTGTGCGTTTGCATGAGTCTTGTTCTGAACGAC      |
| b2-84-K48C for         | AAGTCGTTCTGAACAAGACTCAAGATGCCGCACACAGTCATGGACTG |
| b2-84-K48C rev         | CAGTCCATGACTGTGTGCGGCATCTTGAGTCTTGTTCTGAACGACTT |
| b2-84-R49C for         | GTCGTTCTGAACAAGACTCAAGAAAATGCACACAGTCATG        |
| b2-84-R49C rev         | CATGACTGTGTGCATTTTCTTGAGTCTTGTTCTGAACGAC        |
| b2-84-T50C for         | GAACAAGACTCAAGAAAACGCTGCCAGTCATGGACTGCCTTGAGA   |
| b2-84-T50C rev         | TCTCAAGGCAGTCCATGACTGGCAGCGTTTTCTTGAGTCTTGTTCT  |
| b2-84-Q51C for         | CGTTCGAACAAGACTCAAGAAAACGCACATGCTCATGGACTGCCTTG |

|                    |                                                  |
|--------------------|--------------------------------------------------|
| b2-84-Q51C rev     | CAAGGCAGTCCATGAGCATGTGCGTTTTCTTGAGTCTTGTTCTGAACG |
| b2-84-S52C for     | CAAGACTCAAGAAAACGCACACAGTGCTGGACTGCCTTGA         |
| b2-84-S52C rev     | TCAAGGCAGTCCAGCACTGTGTGCGTTTTCTTGAGTCTTG         |
| b2-84-W53C for     | ACGCACACAGTCATGCACTGCCTTGAGAGTC                  |
| b2-84-W53C rev     | GACTCTCAAGGCAGTGCATGACTGTGTGCGT                  |
| b2-84-T54C for     | CGCACACAGTCATGGTGTGCCTTGAGAGTCGG                 |
| b2-84-T54C rev     | CCGACTCTCAAGGCACACCATGACTGTGTGCG                 |
| b2-110d19-S47C for | CGTTCGAACAAGACTCATGTTCCGTGGCGTATCTA              |
| b2-110d19-S47C rev | TAGATACGCCACGGAACATGAGTCTTGTTCTGAACG             |
| b2-110d19-S48C for | CGTTCGAACAAGACTCAAGTTGCGTGGCGTATCTA              |
| b2-110d19-S48C rev | TAGATACGCCACGCAACTTGAGTCTTGTTCTGAACG             |
| b2-110d19-V49C for | GTTCTGAACAAGACTCAAGTTCTGCGCGTATCTAACTGGCATAATG   |
| b2-110d19-V49C rev | CATTATGCCAGTTTAGATACGCGCAGGAACTTGAGTCTTGTTCTGAAC |
| b2-110d19-A50C for | GAACAAGACTCAAGTTCCGTGTGCTATCTAACTGGCATAATGGC     |
| b2-110d19-A50C rev | GCCATTATGCCAGTTTAGATAGCACACGGAACTTGAGTCTTGTTCT   |
| b2-110d19-Y51C for | GACTCAAGTTCCGTGGCGTGTCTAACTGGCATA                |
| b2-110d19-Y51C rev | TATGCCAGTTTAGACACGCCACGGAACTTGAGTC               |
| b2-110d19-L52C for | AAGACTCAAGTTCCGTGGCGTATTGCAACTGGCATAATGGCCAAATAG |
| b2-110d19-L52C rev | CTATTTGGCCATTATGCCAGTTGCAATACGCCACGGAACTTGAGTCTT |
| b2-110d19-N53C for | ACTCAAGTTCCGTGGCGTATCTATGCTGGCATAATGGCC          |
| b2-110d19-N53C rev | GGCCATTATGCCAGCATAGATACGCCACGGAACTTGAGT          |
| b2-110d19-W54C for | CGTGGCGTATCTAACTGGCATAATGGCCAAATAGAC             |
| b2-110d19-W54C rev | GTCTATTTGGCCATTATGGCAGTTTAGATACGCCACG            |
| Cox5a(1-130)_Fwd   | TGGCGAGCTCATGTTACGTAACACTTTTACTAG                |
| Cox5a(1-130)_Rev   | TACCCTGCAGTAGCTGCCACTCCTTATTC                    |
| sfGFP_Fwd          | GTGGCAGCTACTGCAGGGTAAAGGCGAAG                    |
| pSUMO_Rev          | TACGTAACATGAGCTCGCCACCAATCTG                     |

**Supplementary Table 4. Antibodies used in this study**

| Antibodies                  | Source                                    | Identifier                     | Dilution               |
|-----------------------------|-------------------------------------------|--------------------------------|------------------------|
| Tim17                       | Ref. 65                                   | GR1844-6, GR1844-7             | 1:500; 1:200 (AP)      |
| Tim21                       | Ref. 65                                   | GR3883-7                       | 1:200                  |
| Tim23                       | Ref. 65                                   | GR3878-6, 133-14               | 1:200 to 1:500         |
| Tim44                       | Ref. 65                                   | GR1835-4, 127-5, 127-6         | 1:200 to 1:500         |
| Tim50                       | Ref. 65                                   | GR3881-1, GR5185-4             | 1:500 to 1:1,000       |
| Mgr2                        | Ref. 65                                   | GR3120-1                       | 1:100 (AP)             |
| Aco1                        | Ref. 65                                   | GR945-3, GR945-4               | 1:500                  |
| Atp1                        | Ref. 66                                   | GR 5075-4                      | 1:1,000                |
| Cox1                        | Ref. 65                                   | GR1538-13, GR1539-3            | 1:500                  |
| Cox4                        | Ref. 65                                   | GR578-4                        | 1:500                  |
| Cox12                       | Ref. 67                                   | GR1937-4                       | 1:250                  |
| Mdh1                        | Ref.68                                    | GR1088-6                       | 1:1,000                |
| mtHsp70/Ssc1                | Ref. 67                                   | GR1830-3, GR1830-7             | 1:1,000                |
| Tim22                       | Ref. 69                                   | GR5113-4                       | 1:250                  |
| Tom5                        | Ref. 70                                   | GR3420-7                       | 1:500                  |
| Tom22                       | Ref. 65                                   | GR3227-2, GR3225-7             | 1:500                  |
| Tom40                       | Ref. 65                                   | 168-4, 168-13                  | 1:500                  |
| Tom70                       | Ref. 65                                   | GR657-3                        | 1:250 to 1:500         |
| Yme1                        | Ref. 65                                   | GR1435-6                       | 1:500                  |
| Qcr8                        | Ref. 65                                   | GR1037-5                       | 1:300                  |
| GFP                         | Roche                                     | #11814460001,<br>Lot: 65309400 | 1:1,000                |
| Goat anti-rabbit-<br>HRP    | Jackson<br>ImmunoResearch<br>Laboratories | #111-035-003,<br>Lot: 162282   | 1:5,000 to<br>1:20,000 |
| Goat anti-rabbit<br>IgG-HRP | Sigma-Aldrich                             | #A6154,<br>Lot: SLBG72001V     | 1:8,000 to<br>1:10,000 |
| Horse anti-mouse-<br>HRP    | Cell Signaling<br>Technology              | #7076S,<br>Lot: 38             | 1:2,000                |
